# Supplementary material for: BID-seq for transcriptome-wide quantitative sequencing of mRNA pseudouridine at base resolution
Source: Springer Nature journal article supplement (doi:10.1038/s41596-023-00917-5), 2023-11-15
Supplement: MOESM3 [file 41596_2023_917_MOESM3_ESM9.xlsx]

## Sheet: Supplementary Table 1
Supplementary Table 1 | Calibration curve parameters.
Motif	c	s	b
AAUAA	0.969764	0.886718	0.001
ACUAA	0.985269	0.91482	0.001
AGUAA	0.974123	0.916809	0.001
AUUAA	0.956396	0.854435	0.001
CAUAA	0.984296	0.936133	0.001
CCUAA	0.983285	0.925527	0.001
CGUAA	0.967063	0.871603	0.001
CUUAA	0.985557	0.932352	0.00553112
GAUAA	0.950195	0.685301	0.001
GCUAA	0.976049	0.844292	0.001
GGUAA	0.959475	0.752789	0.001
GUUAA	0.934064	0.469391	0.001
UAUAA	0.974495	0.886456	0.001
UCUAA	0.980562	0.890419	0.001
UGUAA	0.944807	0.779573	0.001
UUUAA	0.967359	0.866394	0.001
AAUAC	0.980003	0.971474	0.001
ACUAC	0.986563	0.927203	0.001
AGUAC	0.980297	0.926413	0.001
AUUAC	0.97129	0.872003	0.001
CAUAC	0.986834	0.98098	0.001
CCUAC	0.980581	0.914886	0.001
CGUAC	0.973551	0.881332	0.001
CUUAC	0.986799	0.95047	0.00487829
GAUAC	0.962592	0.877968	0.001
GCUAC	0.97527	0.795349	0.001
GGUAC	0.971144	0.74952	0.001
GUUAC	0.958537	0.650624	0.001
UAUAC	0.976535	0.965456	0.001
UCUAC	0.984835	0.881483	0.001
UGUAC	0.9695	0.892149	0.001
UUUAC	0.973329	0.892529	0.001
AAUAG	0.985829	0.964221	0.001
ACUAG	0.982704	0.900843	0.001
AGUAG	0.982536	0.94539	0.001
AUUAG	0.981174	0.922453	0.001
CAUAG	0.98459	0.984832	0.001
CCUAG	0.974552	0.875745	0.001
CGUAG	0.980268	0.929489	0.001
CUUAG	0.976895	0.908906	0.00343384
GAUAG	0.977727	0.954002	0.001
GCUAG	0.986759	0.909828	0.001
GGUAG	0.980651	0.887175	0.001
GUUAG	0.968232	0.798135	0.001
UAUAG	0.973734	0.966038	0.001
UCUAG	0.979592	0.866	0.001
UGUAG	0.981073	0.931667	0.001
UUUAG	0.972996	0.901845	0.001
AAUAU	0.959446	0.906707	0.001
ACUAU	0.980453	0.883871	0.001
AGUAU	0.96273	0.855978	0.001
AUUAU	0.958256	0.800133	0.001
CAUAU	0.966195	0.925499	0.001
CCUAU	0.973683	0.852858	0.001
CGUAU	0.958325	0.789548	0.001
CUUAU	0.981248	0.897148	0.00301527
GAUAU	0.938311	0.730481	0.001
GCUAU	0.966845	0.798538	0.001
GGUAU	0.954464	0.663985	0.001
GUUAU	0.930563	0.597112	0.0313522
UAUAU	0.943706	0.895902	0.001
UCUAU	0.974518	0.796527	0.001
UGUAU	0.95687	0.770391	0.001
UUUAU	0.965893	0.848583	0.001
AAUCA	0.980978	0.928696	0.001
ACUCA	0.981399	0.860072	0.001
AGUCA	0.976103	0.908173	0.001
AUUCA	0.979895	0.875869	0.001
CAUCA	0.98404	0.961951	0.001
CCUCA	0.95505	0.747481	0.001
CGUCA	0.940713	0.713048	0.001
CUUCA	0.979581	0.840349	0.001
GAUCA	0.943635	0.764248	0.001
GCUCA	0.970353	0.863982	0.001
GGUCA	0.953594	0.795372	0.001
GUUCA	0.95797	0.725523	0.001
UAUCA	0.97362	0.886652	0.001
UCUCA	0.976596	0.811314	0.001
UGUCA	0.953979	0.717032	0.001
UUUCA	0.972574	0.828221	0.001
AAUCC	0.985909	0.988178	0.00102676
ACUCC	0.98087	0.894713	0.001
AGUCC	0.978628	0.96282	0.001
AUUCC	0.986201	0.951525	0.001
CAUCC	0.982601	0.983021	0.001
CCUCC	0.965305	0.676478	0.001
CGUCC	0.934035	0.873786	0.001
CUUCC	0.98344	0.932775	0.00456816
GAUCC	0.953747	0.925401	0.001
GCUCC	0.962228	0.701367	0.001
GGUCC	0.946043	0.78295	0.001
GUUCC	0.955269	0.756441	0.001
UAUCC	0.980908	0.983576	0.001
UCUCC	0.97643	0.733955	0.001
UGUCC	0.944429	0.892221	0.001
UUUCC	0.980354	0.917806	0.001
AAUCG	0.985309	0.950345	0.001
ACUCG	0.977571	0.847474	0.001
AGUCG	0.972603	0.900689	0.001
AUUCG	0.978701	0.866031	0.001
CAUCG	0.981077	0.964552	0.001
CCUCG	0.944891	0.808014	0.001
CGUCG	0.918754	0.771645	0.001
CUUCG	0.971017	0.774944	0.001
GAUCG	0.939222	0.806841	0.001
GCUCG	0.962445	0.835448	0.001
GGUCG	0.936082	0.786712	0.001
GUUCG	0.951665	0.692976	0.001
UAUCG	0.974724	0.898049	0.001
UCUCG	0.963476	0.774068	0.001
UGUCG	0.948281	0.721872	0.001
UUUCG	0.97258	0.807024	0.001
AAUCU	0.967628	0.897137	0.001
ACUCU	0.973939	0.802956	0.001
AGUCU	0.96555	0.799768	0.001
AUUCU	0.978185	0.86608	0.001
CAUCU	0.965286	0.854564	0.001
CCUCU	0.955472	0.644562	0.001
CGUCU	0.945869	0.560595	0.001
CUUCU	0.976582	0.81203	0.00157093
GAUCU	0.945984	0.742123	0.001
GCUCU	0.956803	0.733575	0.00630133
GGUCU	0.948849	0.58536	0.001
GUUCU	0.962648	0.688993	0.001
UAUCU	0.965913	0.859824	0.001
UCUCU	0.968134	0.759001	0.001
UGUCU	0.953337	0.618671	0.001
UUUCU	0.971214	0.796252	0.001
AAUGA	0.959915	0.763787	0.001
ACUGA	0.971022	0.849999	0.001
AGUGA	0.940605	0.743267	0.001
AUUGA	0.953688	0.715085	0.001
CAUGA	0.967519	0.804143	0.001
CCUGA	0.953035	0.810657	0.001
CGUGA	0.931475	0.634324	0.001
CUUGA	0.951931	0.664312	0.001
GAUGA	0.938624	0.543213	0.001
GCUGA	0.969141	0.897323	0.001
GGUGA	0.928158	0.581245	0.001
GUUGA	0.935078	0.717638	0.001
UAUGA	0.951216	0.669608	0.001
UCUGA	0.969827	0.790595	0.001
UGUGA	0.947024	0.634157	0.001
UUUGA	0.952219	0.678653	0.001
AAUGC	0.93514	0.846957	0.001
ACUGC	0.937425	0.897229	0.001
AGUGC	0.915753	0.841222	0.001
AUUGC	0.956124	0.818268	0.001
CAUGC	0.921489	0.835516	0.001
CCUGC	0.86151	0.794042	0.001
CGUGC	0.837795	0.687762	0.001
CUUGC	0.938431	0.738043	0.0219418
GAUGC	0.870559	0.740443	0.001
GCUGC	0.942996	0.923677	0.001
GGUGC	0.823254	0.654833	0.001
GUUGC	0.92987	0.804578	0.001
UAUGC	0.942251	0.825768	0.001
UCUGC	0.925623	0.800403	0.001
UGUGC	0.876863	0.750693	0.001
UUUGC	0.949504	0.742073	0.00299265
AAUGG	0.973454	0.855949	0.001
ACUGG	0.967354	0.829062	0.001
AGUGG	0.965563	0.856676	0.001
AUUGG	0.970185	0.87598	0.001
CAUGG	0.960976	0.833121	0.001
CCUGG	0.925997	0.718831	0.001
CGUGG	0.917019	0.530347	0.001
CUUGG	0.941226	0.737704	0.001
GAUGG	0.946076	0.717739	0.001
GCUGG	0.963523	0.797714	0.001
GGUGG	0.935177	0.678542	0.001
GUUGG	0.942584	0.737024	0.001
UAUGG	0.965178	0.850506	0.001
UCUGG	0.956159	0.77607	0.001
UGUGG	0.951576	0.705055	0.001
UUUGG	0.955805	0.812965	0.001
AAUGU	0.931502	0.649253	0.001
ACUGU	0.963026	0.822122	0.001
AGUGU	0.932472	0.674444	0.001
AUUGU	0.95714	0.717408	0.001
CAUGU	0.942843	0.680493	0.001
CCUGU	0.924063	0.651367	0.001
CGUGU	0.91134	0.412923	0.001
CUUGU	0.950512	0.628952	0.001
GAUGU	0.927312	0.505086	0.001
GCUGU	0.95609	0.852455	0.001
GGUGU	0.90377	0.435643	0.001
GUUGU	0.939601	0.70837	0.001
UAUGU	0.940207	0.673895	0.001
UCUGU	0.957644	0.701752	0.001
UGUGU	0.941574	0.593617	0.001
UUUGU	0.952765	0.701162	0.001
AAUUA	0.97166	0.929368	0.00220243
ACUUA	0.982302	0.896738	0.001
AGUUA	0.963621	0.892619	0.001
AUUUA	0.962418	0.85178	0.001
CAUUA	0.976378	0.946477	0.00104531
CCUUA	0.981234	0.897265	0.001
CGUUA	0.959075	0.829862	0.001
CUUUA	0.981901	0.926027	0.00860789
GAUUA	0.940856	0.707033	0.001
GCUUA	0.972275	0.794889	0.001
GGUUA	0.94591	0.840808	0.001
GUUUA	0.943696	0.662288	0.001
UAUUA	0.949038	0.955836	0.001
UCUUA	0.975026	0.829796	0.001
UGUUA	0.942392	0.766672	0.001
UUUUA	0.96217	0.882184	0.001
AAUUC	0.970386	0.943817	0.00242655
ACUUC	0.981351	0.92328	0.001
AGUUC	0.971833	0.88445	0.00400267
AUUUC	0.969414	0.857908	0.001
CAUUC	0.983295	0.958309	0.00476894
CCUUC	0.974378	0.846191	0.001
CGUUC	0.95027	0.737027	0.001
CUUUC	0.975174	0.876919	0.00298957
GAUUC	0.955845	0.79812	0.001
GCUUC	0.957704	0.696562	0.001
GGUUC	0.945474	0.719333	0.001
GUUUC	0.943267	0.643593	0.00183941
UAUUC	0.975943	0.952704	0.00488891
UCUUC	0.963212	0.723272	0.001
UGUUC	0.949629	0.777461	0.001
UUUUC	0.975394	0.911676	0.00807294
AAUUG	0.980277	0.960214	0.00764805
ACUUG	0.959945	0.856127	0.00386568
AGUUG	0.967885	0.965342	0.001
AUUUG	0.984122	0.945472	0.0132554
CAUUG	0.96713	0.924859	0.00549611
CCUUG	0.944051	0.758311	0.00161559
CGUUG	0.963109	0.92566	0.001
CUUUG	0.974036	0.926445	0.0144043
GAUUG	0.950735	0.83725	0.00135373
GCUUG	0.947067	0.733234	0.00168153
GGUUG	0.990777	0.99244	0.001
GUUUG	0.963456	0.799961	0.0175323
UAUUG	0.967326	0.952436	0.0104072
UCUUG	0.959625	0.74947	0.00527673
UGUUG	0.981803	0.973052	0.001
UUUUG	0.980011	0.947544	0.00951864
AAUUU	0.952011	0.987413	0.00489684
ACUUU	0.977994	0.954228	0.00334884
AGUUU	0.971255	0.975467	0.00496563
AUUUU	0.967195	0.789709	0.001
CAUUU	0.974724	0.989969	0.0065567
CCUUU	0.948098	0.919789	0.001
CGUUU	0.938242	0.93481	0.001
CUUUU	0.971721	0.785649	0.001
GAUUU	0.937392	0.955538	0.0041806
GCUUU	0.958444	0.807709	0.001
GGUUU	0.951594	0.90334	0.001
GUUUU	0.949811	0.623176	0.001
UAUUU	0.95669	0.984961	0.00507651
UCUUU	0.977231	0.936446	0.00292756
UGUUU	0.955307	0.952964	0.001
UUUUU	0.967651	0.858183	0.001

## Sheet: Supplementary Table 2
Supplementary Table 2 | Ψ sites on mESC RNA.
Ref Type	chr	position	strand	mESCWT-rep1-input_depth	mESCWT-rep1-input_gap	mESCWT-rep2-input_depth	mESCWT-rep2-input_gap	mESCWT-rep3-input_depth	mESCWT-rep3-input_gap	mESCWT-rep1-treated_depth	mESCWT-rep1-treated_gap	mESCWT-rep2-treated_depth	mESCWT-rep2-treated_gap	mESCWT-rep3-treated_depth	mESCWT-rep3-treated_gap	mESCWT_coverage	mESCWT_ratio	mESCWT_fraction	mESCWT_pval
genes	rRNA_Rn28s1	43	+	1224	1	1035	0	1090	1	1435	68	1042	55	1280	54	3757	0.0471121	0.407551	5.19571e-47
genes	rRNA_Rn28s1	45	+	1296	4	1086	1	1160	3	1512	867	1103	626	1329	761	3944	0.571501	1	0
genes	rRNA_Rn28s1	1100	+	2070	1	1470	0	1682	0	2991	76	2310	45	2670	52	7971	0.0217037	0.0964296	4.62538e-37
genes	rRNA_Rn28s1	1350	+	2869	2	2641	3	2698	5	3408	981	2765	775	3226	929	9399	0.285669	0.789787	0
genes	rRNA_Rn28s1	1396	+	2883	6	2535	4	2697	2	3199	1072	2844	987	2978	1013	9021	0.340539	0.897251	0
genes	rRNA_Rn28s1	1491	+	2032	5	1899	4	1864	3	1180	556	1058	497	1042	561	3280	0.492073	0.830223	0
genes	rRNA_Rn28s1	1497	+	1968	0	1871	1	1820	2	1021	440	935	416	889	405	2845	0.443234	0.966793	0
genes	rRNA_Rn28s1	1547	+	1821	1	1583	4	1671	3	1270	743	977	470	1196	707	3443	0.557653	0.877117	0
genes	rRNA_Rn28s1	1582	+	1242	1	1090	0	1116	1	273	2	223	8	232	6	728	0.021978	0.130666	6.83112e-11
genes	rRNA_Rn28s1	1584	+	1238	0	1086	1	1106	1	222	40	173	30	182	35	577	0.181976	0.840926	3.04963e-89
genes	rRNA_Rn28s1	1595	+	1512	3	1378	0	1430	2	496	63	416	63	428	88	1340	0.159701	0.60544	1.43865e-131
genes	rRNA_Rn28s1	1665	+	2414	2	2309	0	2283	2	628	278	507	219	507	241	1642	0.449452	0.957539	0
genes	rRNA_Rn28s1	2266	+	2363	2	1950	3	2165	2	2909	1040	2417	820	2701	977	8027	0.353432	0.786132	0
genes	rRNA_Rn28s1	2390	+	2527	9	2163	4	2306	10	2139	1179	1742	998	1985	1064	5866	0.552506	0.955835	0
genes	rRNA_Rn28s1	2465	+	2612	2	2189	1	2466	1	3459	108	2994	56	3373	104	9826	0.0272746	0.0928538	5.99766e-59
genes	rRNA_Rn28s1	2577	+	2523	3	2147	3	2278	2	3121	81	2456	35	2929	74	8506	0.0223372	0.060546	2.0205e-39
genes	rRNA_Rn28s1	2597	+	2804	1	2357	1	2593	0	3331	127	2676	87	3272	94	9279	0.0331932	0.333962	5.54169e-79
genes	rRNA_Rn28s1	2992	+	1373	2	1092	5	1054	4	2349	65	1803	49	2096	48	6248	0.0259283	0.118025	2.32287e-20
genes	rRNA_Rn28s1	3297	+	2721	2	2412	0	2429	0	1037	265	760	176	933	229	2730	0.245421	0.670301	0
genes	rRNA_Rn28s1	3299	+	2708	1	2395	1	2409	1	1036	196	757	162	935	195	2728	0.202713	0.882682	0
genes	rRNA_Rn28s1	3355	+	3328	8	3178	11	3049	8	2988	2344	2878	2257	2861	2286	8727	0.78916	0.97642	0
genes	rRNA_Rn28s1	3367	+	3177	2	3004	2	2979	2	2955	74	2750	40	2830	80	8535	0.0227299	0.0620319	2.05433e-53
genes	rRNA_Rn28s1	3375	+	2742	1	2440	2	2632	0	2333	303	1846	222	2175	294	6354	0.128895	0.358089	3.68799e-292
genes	rRNA_Rn28s1	3389	+	2156	2	1800	1	2030	1	1239	416	680	222	1066	381	2985	0.341374	0.929087	0
genes	rRNA_Rn28s1	3394	+	2048	1	1759	2	1963	1	1065	206	560	85	898	175	2523	0.184701	0.508582	6.53214e-247
genes	rRNA_Rn28s1	3418	+	2104	0	1794	0	1958	0	622	35	353	22	502	36	1477	0.0629655	0.454634	1.7808e-66
genes	rRNA_Rn28s1	3422	+	2076	1	1781	0	1912	2	584	48	350	31	451	48	1385	0.0916968	0.471538	4.31344e-88
genes	rRNA_Rn28s1	3424	+	2052	1	1769	0	1866	1	585	21	355	14	445	28	1385	0.0454874	0.129968	1.06732e-42
genes	rRNA_Rn28s1	3428	+	1958	2	1647	0	1771	1	574	16	352	4	454	9	1380	0.0210145	0.0965166	2.02896e-17
genes	rRNA_Rn28s1	3430	+	1904	3	1601	2	1721	0	566	9	350	12	460	11	1376	0.0232558	0.0892233	1.7396e-17
genes	rRNA_Rn28s1	3478	+	1969	0	1737	1	1904	0	1228	238	800	142	1067	189	3095	0.183845	0.625244	1.22605e-269
genes	rRNA_Rn28s1	3482	+	2023	0	1733	0	1925	1	1258	209	815	142	1107	203	3180	0.174214	0.33527	2.72904e-259
genes	rRNA_Rn28s1	3504	+	2047	1	1681	0	1901	1	818	230	539	131	735	192	2092	0.26434	0.823902	0
genes	rRNA_Rn28s1	3511	+	1891	0	1574	1	1775	1	640	57	409	52	558	76	1607	0.115121	0.536683	7.60698e-117
genes	rRNA_Rn28s1	3513	+	1860	3	1550	1	1742	0	651	279	412	152	568	241	1631	0.412017	0.99606	0
genes	rRNA_Rn28s1	3544	+	2173	2	1784	2	2025	6	1982	408	1330	285	1935	374	5247	0.203354	0.522694	0
genes	rRNA_Rn28s1	3580	+	2508	5	2110	9	2353	6	2665	2215	2028	1623	2584	2176	7277	0.826439	0.999766	0
genes	rRNA_Rn28s1	3617	+	2259	3	2015	0	2227	0	2647	150	2202	109	2656	143	7505	0.0535643	0.0991341	8.4901e-106
genes	rRNA_Rn28s1	3619	+	2229	2	1971	3	2172	7	2559	1900	2134	1565	2578	1927	7271	0.741576	0.995554	0
genes	rRNA_Rn28s1	3949	+	2080	0	1855	0	1827	0	371	65	278	42	281	65	930	0.184946	0.493364	1.63175e-154
genes	rRNA_Rn28s1	3952	+	2111	2	1894	3	1860	3	338	64	244	54	253	57	835	0.209581	0.462347	1.77599e-153
genes	rRNA_Rn28s1	3968	+	2064	1	1838	0	1818	1	548	121	406	94	454	115	1408	0.234375	0.933083	1.9102e-243
genes	rRNA_Rn28s1	4010	+	1508	2	1244	4	1325	2	371	249	196	155	253	222	820	0.763415	0.988847	0
genes	rRNA_Rn28s1	4016	+	1472	2	1178	3	1279	3	496	151	250	66	380	115	1126	0.294849	0.810242	4.2572e-221
genes	rRNA_Rn28s1	4059	+	2060	5	1825	4	1903	2	942	488	660	349	839	460	2441	0.53134	0.854251	0
genes	rRNA_Rn28s1	4076	+	2425	1	2074	1	2207	1	793	468	588	310	673	386	2054	0.566699	0.862536	0
genes	rRNA_Rn28s1	4079	+	2443	2	2112	0	2231	0	802	70	598	35	681	54	2081	0.0764056	0.856523	5.39369e-99
genes	rRNA_Rn28s1	4087	+	2569	0	2240	1	2356	6	923	242	721	181	789	200	2433	0.256062	0.653304	0
genes	rRNA_Rn28s1	4098	+	2794	0	2566	2	2617	0	1320	851	1121	713	1145	738	3586	0.641941	1	0
genes	rRNA_Rn28s1	4113	+	2781	5	2541	2	2728	5	1701	984	1472	862	1524	927	4697	0.590377	0.880607	0
genes	rRNA_Rn28s1	4127	+	2496	5	2179	2	2409	3	1797	1321	1379	992	1518	1120	4694	0.731359	0.930701	0
genes	rRNA_Rn28s1	4157	+	2791	4	2323	2	2627	1	1677	1075	1152	693	1421	884	4250	0.624	0.895525	0
genes	rRNA_Rn28s1	4177	+	2649	3	2333	0	2474	1	977	601	740	440	841	505	2558	0.604378	0.865943	0
genes	rRNA_Rn28s1	4208	+	2277	2	1980	3	2123	0	573	216	398	169	473	215	1444	0.415512	0.803967	0
genes	rRNA_Rn28s1	4233	+	2110	2	1831	1	2027	2	695	171	442	127	581	171	1718	0.272992	0.598079	2.3163e-319
genes	rRNA_Rn28s1	4235	+	2097	0	1820	2	2004	0	712	257	443	156	595	211	1750	0.356571	0.971176	0
genes	rRNA_Rn28s1	4284	+	2274	4	2110	1	2132	3	2031	1295	1603	1001	1843	1218	5477	0.641592	0.985483	0
genes	rRNA_Rn28s1	4292	+	2440	0	2309	2	2345	0	2414	430	1936	343	2218	341	6568	0.16961	0.408127	0
genes	rRNA_Rn28s1	4329	+	2594	0	2491	5	2456	1	3007	642	2616	580	2821	610	8444	0.216959	0.678282	0
genes	rRNA_Rn28s1	4345	+	2248	0	2236	10	2161	2	2820	1657	2571	1475	2573	1530	7964	0.585384	0.930784	0
genes	rRNA_Rn28s1	4623	+	3150	5	3047	1	2866	0	1912	304	1827	327	1828	337	5567	0.173882	0.844912	0
genes	rRNA_Rn28s1	4652	+	3085	6	2950	2	2874	1	1768	730	1561	660	1684	709	5013	0.418711	0.926273	0
genes	rRNA_Rn28s1	4661	+	2769	0	2634	1	2581	0	1587	479	1381	389	1479	443	4447	0.294805	0.87247	0
genes	rRNA_Rn18s	33	+	1189	0	1064	0	1092	0	920	537	693	375	828	449	2441	0.557558	0.804938	0
genes	rRNA_Rn18s	35	+	1260	2	1140	4	1163	1	990	95	742	74	886	87	2618	0.0977846	0.371148	7.5518e-88
genes	rRNA_Rn18s	92	+	2921	2	2718	0	2665	0	1536	478	1399	403	1355	429	4290	0.305361	0.773101	0
genes	rRNA_Rn18s	104	+	2968	0	2816	3	2738	1	1365	407	1279	336	1207	311	3851	0.273695	0.856694	0
genes	rRNA_Rn18s	108	+	3064	0	2937	2	2855	1	1595	710	1505	654	1419	618	4519	0.438593	0.912098	0
genes	rRNA_Rn18s	118	+	3274	3	3244	4	3134	3	2209	670	2153	604	2051	612	6413	0.29409	0.883971	0
genes	rRNA_Rn18s	198	+	2545	5	2469	5	2435	8	2450	65	2431	54	2249	67	7130	0.026087	0.251537	9.94885e-39
genes	rRNA_Rn18s	219	+	2293	3	2111	1	2139	4	1294	408	1191	342	1183	358	3668	0.302072	1	0
genes	rRNA_Rn18s	407	+	2515	1	2242	4	2368	0	3197	1131	2627	931	3021	984	8845	0.344375	0.598707	0
genes	rRNA_Rn18s	573	+	2212	3	1787	5	1988	2	1905	1097	1447	761	1615	920	4967	0.559291	0.961511	0
genes	rRNA_Rn18s	610	+	2601	1	2310	0	2253	3	2162	997	1924	819	1953	854	6039	0.442126	0.815037	0
genes	rRNA_Rn18s	652	+	2353	2	2020	0	2091	0	869	264	592	214	730	220	2191	0.318576	0.96249	0
genes	rRNA_Rn18s	683	+	3863	1	3368	1	3499	2	2855	1081	2459	921	2651	1010	7965	0.378154	0.740039	0
genes	rRNA_Rn18s	687	+	3953	1	3405	1	3512	3	3002	1659	2609	1366	2815	1530	8426	0.540589	0.866789	0
genes	rRNA_Rn18s	801	+	2658	3	2354	3	2487	5	1160	294	905	223	1028	263	3093	0.252182	0.528396	0
genes	rRNA_Rn18s	815	+	2232	2	2030	1	2113	0	545	69	375	44	473	44	1393	0.112706	0.656717	1.37486e-115
genes	rRNA_Rn18s	823	+	2113	0	1937	1	2008	0	540	70	382	39	445	52	1367	0.117776	0.392744	2.01569e-120
genes	rRNA_Rn18s	864	+	2985	2	2705	1	2915	4	2105	1106	1720	890	1906	997	5731	0.522247	0.934183	0
genes	rRNA_Rn18s	867	+	3048	0	2815	1	2978	3	2301	922	1899	802	2087	840	6287	0.407826	0.849208	0
genes	rRNA_Rn18s	889	+	3288	5	3039	4	3141	1	3217	98	2817	95	2925	94	8959	0.0320348	0.136781	2.31628e-76
genes	rRNA_Rn18s	898	+	3601	3	3376	1	3475	3	3573	507	3188	478	3261	454	10022	0.143584	0.322626	0
genes	rRNA_Rn18s	919	+	3387	1	3261	4	3234	3	3041	1029	2819	955	2936	1018	8796	0.341291	0.81574	0
genes	rRNA_Rn18s	967	+	2739	3	2720	3	2739	4	2730	1519	2423	1365	2570	1444	7723	0.560404	0.92496	0
genes	rRNA_Rn18s	1005	+	2710	3	2541	3	2545	3	1847	1091	1552	887	1696	981	5095	0.580765	0.887149	0
genes	rRNA_Rn18s	1047	+	3012	6	2915	3	2756	4	1797	1016	1534	884	1634	926	4965	0.569184	0.852363	0
genes	rRNA_Rn18s	1057	+	2634	2	2529	6	2326	6	1897	1166	1663	1046	1739	1120	5299	0.628798	0.930083	0
genes	rRNA_Rn18s	1082	+	2438	3	2346	7	2139	6	2670	2031	2574	1969	2537	1972	7781	0.767511	0.996648	0
genes	rRNA_Rn18s	1175	+	2930	0	2654	1	2696	0	1926	658	1570	503	1839	662	5335	0.341706	0.803882	0
genes	rRNA_Rn18s	1178	+	2914	2	2649	0	2679	0	1992	480	1596	391	1876	441	5464	0.240117	0.985629	0
genes	rRNA_Rn18s	1233	+	2498	1	2443	1	2252	0	1960	155	1708	145	1758	146	5426	0.0821968	0.34878	2.2514e-164
genes	rRNA_Rn18s	1239	+	2465	5	2416	1	2224	1	1838	585	1563	481	1643	540	5044	0.318398	0.714014	0
genes	rRNA_Rn18s	1245	+	2324	0	2289	3	2098	2	1756	201	1544	197	1607	224	4907	0.126758	0.324993	3.11434e-233
genes	rRNA_Rn18s	1249	+	2246	68	2246	67	2007	58	1857	989	1648	795	1733	845	5238	0.501909	0.894493	0
genes	rRNA_Rn18s	1348	+	2743	3	2763	3	2659	3	2404	1796	2317	1631	2215	1684	6936	0.73688	0.96973	0
genes	rRNA_Rn18s	1368	+	2932	2	3001	3	2790	1	2476	1507	2410	1425	2198	1376	7084	0.608131	0.958679	0
genes	rRNA_Rn18s	1446	+	2639	5	2488	4	2335	0	2710	1729	2526	1579	2437	1541	7673	0.631956	0.971813	0
genes	rRNA_Rn18s	1626	+	2038	1	1831	2	1899	1	2241	435	1928	368	1929	360	6098	0.190718	0.840244	0
genes	rRNA_Rn18s	1644	+	2198	3	2058	3	1991	3	2267	1181	1971	1024	1925	996	6163	0.51939	0.97038	0
genes	rRNA_Rn18s	1693	+	3149	2	3159	6	2918	2	3389	1854	3418	1872	3042	1704	9849	0.551325	0.843956	0
genes	rRNA_Rs5-8s1	54	+	1520	1	1308	0	1348	1	1536	190	1132	157	1398	209	4066	0.136744	0.713928	1.19817e-175
genes	rRNA_Rs5-8s1	68	+	1734	2	1541	1	1510	0	1575	465	1214	339	1472	449	4261	0.294062	0.561296	0
genes	rRNA_Rn5s	112	+	302	0	189	0	335	0	515	24	308	12	565	25	1388	0.0439481	0.244122	2.57697e-13
genes	rRNA_mt-Rnr2_17725	938	+	1140	0	855	0	1031	0	1640	128	1178	72	1438	123	4256	0.0758929	0.426282	2.30632e-78
genes	rRNA_mt-Rnr2_17725	1168	+	1295	0	801	1	1254	1	1789	71	1081	33	1715	72	4585	0.038386	0.178226	8.33998e-40
genes	rRNA_mt-Rnr2_17725	1364	+	1821	0	1369	1	1805	0	2357	123	1785	64	2295	110	6437	0.0461395	0.0856032	5.20936e-74
genes	rRNA_mt-Rnr2_17725	1383	+	1520	1	1195	1	1562	1	2020	43	1587	38	1911	43	5518	0.0224719	0.0701577	2.01457e-27
genes	rRNA_mt-Rnr2_17725	1416	+	1299	2	1033	0	1317	1	1754	504	1428	411	1756	475	4938	0.28149	0.671116	0
genes	tRNA_TrnL1_17735	29	+	257	0	185	0	234	1	396	26	289	22	379	41	1064	0.0836466	0.42666	8.16639e-19
genes	tRNA_TrnL1_17735	57	+	199	1	135	1	174	2	261	156	195	121	245	132	701	0.583452	0.872589	1.4605e-121
genes	tRNA_n-TCgca57_102467643	54	+	18	0	6	0	10	0	20	8	15	5	19	8	54	0.388889	0.728742	5.22731e-06
genes	tRNA_n-TDgtc4_102467481	54	+	196	60	134	52	187	48	276	199	230	162	280	201	786	0.715013	0.936079	6.31642e-48
genes	tRNA_n-TEttc7_108167516	13	+	56	5	37	4	42	7	49	23	38	12	54	28	141	0.446809	0.875292	7.45201e-10
genes	tRNA_n-TEttc7_108167516	53	+	80	13	42	9	50	8	65	25	63	29	72	29	200	0.415	0.757321	2.95782e-07
genes	tRNA_n-TGgcc2_102467530	53	+	108	14	96	11	109	10	116	16	93	32	113	25	322	0.226708	0.512109	7.88241e-05
genes	tRNA_n-TKctt15_102467347	27	+	77	9	70	8	64	10	62	24	60	22	54	20	176	0.375	0.778702	1.21018e-08
genes	tRNA_n-TKctt15_102467347	55	+	45	1	44	4	36	0	37	6	32	7	27	8	96	0.21875	0.500007	4.39624e-05
genes	snRNA_Gm22063_115487000	31	+	135	10	72	12	114	9	124	32	106	29	123	28	353	0.252125	0.909435	6.84164e-08
genes	snRNA_Gm22352_115489657	31	+	95	8	39	6	68	6	78	23	73	18	75	14	226	0.243363	0.904594	5.69839e-05
genes	snRNA_Gm22418_115490508	31	+	116	10	53	9	97	10	98	26	82	26	103	26	283	0.275618	0.92106	4.97799e-07
genes	snRNA_Gm22618_115490223	32	+	72	5	37	5	56	3	68	20	56	12	68	12	192	0.229167	0.726385	6.83894e-05
genes	snRNA_Gm22623_115487553	31	+	159	15	79	11	144	12	148	35	127	32	142	28	417	0.227818	0.895206	6.48403e-07
genes	snRNA_Gm22645_115488865	31	+	94	9	40	8	76	6	68	16	59	19	73	20	200	0.275	0.920777	1.45272e-05
genes	snRNA_Gm22886_115488969	31	+	97	8	41	8	81	7	71	16	60	19	76	20	207	0.2657	0.916375	1.33771e-05
genes	snRNA_Gm23057_115487339	31	+	128	10	58	9	98	9	99	24	90	28	104	27	293	0.269625	0.918266	7.06475e-08
genes	snRNA_Gm23092_115490324	31	+	134	14	64	9	114	8	118	32	108	27	108	19	334	0.233533	0.898784	3.26227e-06
genes	snRNA_Gm23137_115487935	31	+	92	8	39	8	74	6	66	16	57	18	73	20	196	0.27551	0.921011	1.27141e-05
genes	snRNA_Gm23402_115487709	31	+	82	11	27	7	57	8	64	26	59	20	62	18	185	0.345946	0.947257	3.41421e-05
genes	snRNA_Gm23610_115488968	31	+	99	8	41	8	81	7	72	16	62	20	79	21	213	0.267606	0.917299	7.9944e-06
genes	snRNA_Gm23629_115488452	31	+	99	8	41	8	81	7	72	16	62	20	79	21	213	0.267606	0.917299	7.9944e-06
genes	snRNA_Gm23712_115490327	31	+	121	10	55	9	98	9	94	22	87	28	103	27	284	0.271127	0.918976	1.93512e-07
genes	snRNA_Gm23805_115487578	31	+	116	10	52	8	96	9	90	21	82	26	99	25	271	0.265683	0.916367	7.01225e-07
genes	snRNA_Gm23924_115490511	31	+	115	10	52	8	97	9	90	21	82	26	101	27	273	0.271062	0.918946	3.34517e-07
genes	snRNA_Gm24018_115488248	31	+	139	10	72	12	113	9	129	33	108	30	125	30	362	0.256906	0.911953	2.00368e-08
genes	snRNA_Gm24019_115487555	31	+	160	12	80	13	138	9	151	38	123	35	152	34	426	0.251174	0.908924	7.58401e-10
genes	snRNA_Gm24182_115487711	31	+	177	16	96	13	162	11	171	40	144	40	163	33	478	0.236402	0.900523	2.361e-09
genes	snRNA_Gm24414_115486840	31	+	175	16	96	13	161	11	168	40	142	39	161	32	471	0.235669	0.900083	3.98666e-09
genes	snRNA_Gm24456_115489884	31	+	98	8	42	8	81	7	73	16	62	20	79	21	214	0.266355	0.916694	8.91664e-06
genes	snRNA_Gm24565_115490512	31	+	96	9	41	9	77	6	70	16	60	19	74	21	204	0.27451	0.920552	1.81137e-05
genes	snRNA_Gm24596_115486854	31	+	130	10	69	10	108	9	120	30	101	30	120	28	341	0.258065	0.912551	3.06747e-08
genes	snRNA_Gm24861_115488727	31	+	95	9	40	8	76	6	68	16	59	19	73	20	200	0.275	0.920777	1.31805e-05
genes	snRNA_Gm24863_115488244	31	+	115	8	50	9	93	6	101	29	89	22	95	18	285	0.242105	0.903873	1.15525e-06
genes	snRNA_Gm24870_115488243	31	+	127	10	58	9	98	9	99	23	90	28	104	27	293	0.266212	0.916624	1.27233e-07
genes	snRNA_Gm25101_115488581	31	+	90	7	38	6	69	6	75	22	71	18	74	15	220	0.25	0.908288	2.64027e-05
genes	snRNA_Gm25173_115490093	31	+	130	10	69	10	108	9	120	30	101	30	120	28	341	0.258065	0.912551	3.06747e-08
genes	snRNA_Gm25245_115488725	31	+	129	10	65	10	107	9	116	29	95	28	115	28	326	0.260736	0.913912	4.95197e-08
genes	snRNA_Gm25312_115487707	31	+	92	8	39	8	75	8	68	16	57	19	73	20	198	0.277778	0.922041	3.23654e-05
genes	snRNA_Gm25794_115487565	31	+	98	8	41	8	81	7	73	17	62	20	80	21	215	0.269767	0.918334	6.72324e-06
genes	snRNA_Gm25829_115487701	31	+	178	16	96	13	162	11	172	40	144	40	165	34	481	0.237006	0.900885	1.81626e-09
genes	snRNA_Gm26127_115489662	31	+	109	9	50	8	89	8	94	26	85	22	96	21	275	0.250909	0.908781	4.80741e-06
genes	snRNA_Gm26245_115487705	31	+	99	8	41	8	81	7	72	16	62	20	79	21	213	0.267606	0.917299	7.9944e-06
genes	snRNA_Gm26316_115487919	91	+	450	13	303	4	354	8	498	25	444	31	461	23	1403	0.0563079	0.600895	1.19116e-05
genes	snRNA_Gm26331_115486996	31	+	126	13	62	9	112	8	113	30	104	26	105	20	322	0.236025	0.900297	3.99569e-06
genes	snRNA_LOC115486835_115486835	31	+	172	16	91	13	157	11	161	39	139	37	156	30	456	0.232456	0.898122	2.63158e-08
genes	snRNA_LOC115487916_115487916	91	+	483	16	310	4	374	11	532	27	461	34	487	24	1480	0.0574324	0.606392	6.14544e-05
genes	snRNA_Rnu2-10_19848	91	+	470	14	301	4	368	11	521	25	455	33	477	24	1453	0.056435	0.601522	5.7375e-05
genes	snoRNA_Gm23639_115489002	80	+	91	9	46	8	85	6	133	72	65	40	113	59	311	0.549839	0.868729	2.28901e-28
genes	snoRNA_Gm24336_115489055	17	+	11	0	5	1	5	0	10	6	4	4	11	8	25	0.72	0.990772	2.4726e-06
genes	snoRNA_Gm25636_115486823	81	+	22	2	9	1	11	0	27	15	17	8	20	13	64	0.5625	0.958646	8.82514e-08
genes	snoRNA_Gm26202_115488998	35	+	52	1	38	0	47	1	72	13	53	4	74	11	199	0.140704	0.551662	1.72851e-05
genes	snoRNA_LOC115487273_115487273	83	+	108	6	71	4	97	1	142	40	123	30	125	37	390	0.274359	0.931624	4.72475e-17
genes	snoRNA_LOC115487638_115487638	27	+	124	0	83	0	101	1	211	12	168	10	230	15	609	0.0607553	0.243164	2.52763e-06
genes	snoRNA_LOC115488691_115488691	17	+	60	3	29	3	51	7	86	55	38	30	81	54	205	0.678049	0.989992	1.45189e-29
genes	snoRNA_Snora73a_100306944	38	+	88	4	54	0	78	2	142	23	112	8	127	13	381	0.115486	0.330916	5.34803e-05
genes	snoRNA_Snora73b_100306945	38	+	148	1	100	1	133	2	226	25	162	23	207	37	595	0.142857	0.391102	3.66513e-15
genes	premiRNA_Mir6240_102466620	72	+	96	0	105	0	57	1	91	73	139	109	102	74	332	0.771084	0.970839	5.00307e-96
genes	premiRNA_Mir6516_102465258	59	+	49	0	34	0	44	1	80	26	42	11	68	28	190	0.342105	0.768876	5.44479e-16
genes	premiRNA_Mir682_751556	73	+	510	2	402	0	459	0	747	27	522	9	692	13	1961	0.0249873	0.0677521	9.57959e-10
genes	premiRNA_Mir692-1_751529	66	+	97	0	112	0	76	0	176	9	180	7	165	11	521	0.0518234	0.15013	5.98592e-06
genes	premiRNA_Mir692-2_735288	64	+	1543	1	1607	1	1517	1	2244	107	2237	132	2221	98	6702	0.0502835	0.14601	6.33614e-74
genome	1	4916647	+	189	0	137	0	177	0	328	14	211	2	318	6	857	0.0256709	0.113815	3.49806e-05
genome	1	7248025	+	543	1	490	0	615	1	951	46	684	32	898	47	2533	0.0493486	0.151829	2.43891e-25
genome	1	7248346	+	366	0	277	0	335	0	596	28	439	11	523	18	1558	0.0365854	0.221006	5.81894e-13
genome	1	12191450	+	205	0	138	0	184	0	351	29	226	17	337	39	914	0.0929978	0.292616	3.47097e-18
genome	1	13132613	+	153	1	131	0	133	0	246	33	213	25	258	34	717	0.128312	0.505839	1.81268e-18
genome	1	13132648	+	907	3	750	3	847	2	1321	40	1182	41	1336	45	3839	0.032821	0.194604	2.30596e-19
genome	1	14935274	+	428	0	281	0	439	0	710	34	526	11	694	20	1930	0.0336788	0.824897	4.42554e-14
genome	1	14935706	+	1282	0	1110	0	1255	1	1620	378	1383	358	1672	411	4675	0.245348	0.642572	5.3793926e-316
genome	1	15875946	+	162	1	112	0	158	0	239	21	140	10	248	14	627	0.0717703	0.185218	5.89816e-10
genome	1	24652209	+	226	0	197	0	210	0	427	13	299	7	428	9	1154	0.02513	0.116651	2.73835e-06
genome	1	33521481	+	112	0	125	2	140	0	196	16	191	7	193	7	580	0.0517241	0.197767	1.98494e-05
genome	1	34479136	+	132	0	91	0	108	0	263	7	157	8	224	8	644	0.0357143	0.186508	6.2835e-05
genome	1	36732309	+	411	0	329	1	373	0	699	8	467	9	626	24	1792	0.0228795	0.210988	3.54428e-08
genome	1	37933022	+	151	0	90	0	130	0	249	12	172	6	222	7	643	0.0388802	0.104468	9.51948e-06
genome	1	39407041	+	86	0	49	0	78	0	144	10	114	5	158	12	416	0.0649038	0.199029	1.05512e-05
genome	1	39409157	+	950	0	781	1	926	0	1245	40	1010	15	1251	26	3506	0.0231033	0.13945	3.48656e-19
genome	1	39410864	+	75	0	42	0	54	0	97	8	75	3	119	12	291	0.0790378	0.308762	1.72524e-05
genome	1	40029333	+	81	0	57	0	85	0	150	10	100	8	117	7	367	0.0681199	0.208354	5.08297e-06
genome	1	43228633	+	703	0	557	0	710	0	1129	41	759	26	1052	34	2940	0.0343537	0.209436	1.58116e-23
genome	1	44014639	+	56	0	42	0	61	0	136	14	90	9	95	9	321	0.0996885	0.459804	1.49008e-06
genome	1	45074722	+	141	0	109	1	136	0	238	9	153	6	253	11	644	0.0403727	0.207363	4.51396e-05
genome	1	45853779	+	162	0	90	0	158	0	310	12	164	6	272	12	746	0.0402145	0.12238	1.5908e-06
genome	1	46454696	+	622	1	536	1	610	0	939	61	855	56	928	61	2722	0.0653931	0.401062	5.29782e-37
genome	1	46455321	+	269	2	260	2	301	0	445	15	406	8	405	14	1256	0.0294586	0.100701	1.8128e-05
genome	1	46455474	+	111	0	70	0	90	0	196	13	101	2	175	11	472	0.0550847	0.101887	5.81284e-06
genome	1	47697219	+	658	0	493	0	659	1	1037	22	720	12	982	25	2739	0.0215407	0.0656852	1.93138e-12
genome	1	47697397	+	189	0	157	1	192	0	376	22	261	10	351	18	988	0.0506073	0.333944	4.45401e-09
genome	1	47698172	+	92	0	55	0	75	0	189	9	110	3	174	12	473	0.05074	0.0940046	8.0493e-05
genome	1	55374736	+	800	1	619	0	698	0	1190	80	986	54	1143	82	3319	0.0650798	0.280581	2.74415e-46
genome	1	58432337	+	241	0	174	0	227	0	435	10	282	8	407	8	1124	0.0231317	0.125741	7.11119e-06
genome	1	58439284	+	165	0	111	0	147	0	273	10	115	11	260	9	648	0.0462963	0.432322	2.16538e-07
genome	1	58439887	+	296	0	233	0	282	2	517	23	294	8	483	16	1294	0.0363215	0.288924	1.63897e-08
genome	1	58443485	+	351	2	207	0	303	0	554	10	252	6	574	16	1380	0.0231884	0.0741441	1.48828e-05
genome	1	58443492	+	364	0	213	0	319	1	577	15	255	9	591	20	1423	0.0309206	0.181318	6.56909e-09
genome	1	58444903	+	255	1	159	1	223	0	454	47	226	17	371	23	1051	0.0827783	0.407855	1.96873e-16
genome	1	58444921	+	268	1	162	0	239	0	461	5	243	8	384	14	1088	0.0248162	0.233658	2.42409e-05
genome	1	58446184	+	77	0	38	0	68	0	147	8	77	3	121	12	345	0.0666667	0.270156	4.31259e-05
genome	1	58687076	+	470	2	368	0	476	0	713	33	413	6	753	28	1879	0.0356573	0.107172	9.82662e-14
genome	1	59729647	+	363	0	245	0	346	0	589	14	333	8	563	11	1485	0.0222222	0.0677666	6.72769e-08
genome	1	59729682	+	281	0	136	0	283	0	457	48	179	18	426	40	1062	0.0998117	0.281958	5.46207e-25
genome	1	59735219	+	244	1	139	0	245	0	448	23	205	8	468	15	1121	0.0410348	0.110008	1.66207e-08
genome	1	59742042	+	326	0	207	0	321	0	551	18	358	12	529	18	1438	0.0333797	0.753545	1.4219e-10
genome	1	59743324	+	287	0	174	0	265	0	455	10	259	6	449	8	1163	0.0206363	0.180533	8.02229e-06
genome	1	60156694	+	320	0	220	0	302	1	535	21	317	19	514	27	1366	0.0490483	0.157942	1.54484e-13
genome	1	60743256	+	650	2	499	0	582	1	976	37	806	23	935	28	2717	0.0323887	0.0875305	6.63741e-16
genome	1	60743308	+	620	0	425	0	569	0	985	79	702	65	883	78	2570	0.0863813	0.382654	2.15947e-49
genome	1	60744137	+	306	1	170	0	274	0	559	33	327	8	464	16	1350	0.0422222	0.375226	1.64355e-10
genome	1	63216327	+	893	0	782	0	928	0	1283	57	1245	35	1334	34	3862	0.0326256	0.0968563	2.77882e-29
genome	1	63216378	+	923	0	808	0	868	1	1228	85	1087	106	1244	131	3559	0.0904749	0.432617	4.92154e-78
genome	1	63216444	+	899	1	812	0	865	1	1246	26	961	16	1191	31	3398	0.0214832	0.18467	5.05631e-16
genome	1	63217588	+	19	2	17	2	28	3	72	34	30	12	76	23	178	0.38764	0.712399	1.36964e-05
genome	1	63218013	+	662	0	433	0	616	2	899	194	483	87	983	187	2365	0.197886	0.559159	2.17567e-116
genome	1	65592064	+	180	0	167	0	158	0	320	10	279	7	301	12	900	0.0322222	0.0954716	2.08333e-06
genome	1	71596714	+	227	0	149	0	204	1	357	18	219	4	347	9	923	0.0335861	0.126779	2.9554e-06
genome	1	71603666	+	220	0	183	1	195	0	376	14	256	3	387	15	1019	0.0314033	0.0926516	4.16599e-06
genome	1	71604042	+	98	0	64	0	80	0	192	31	116	13	202	28	510	0.141176	0.457961	1.249e-13
genome	1	71610010	+	261	0	131	0	207	0	360	15	138	2	326	4	824	0.0254854	0.0728926	9.33165e-06
genome	1	71610012	+	264	0	129	0	204	0	360	17	136	11	329	20	825	0.0581818	0.53352	2.47445e-12
genome	1	71612114	+	169	0	93	0	128	1	266	8	94	5	219	12	579	0.0431779	0.199551	2.34626e-05
genome	1	71615266	+	174	0	167	0	169	1	301	23	190	12	234	16	725	0.0703448	0.365434	1.72111e-11
genome	1	71618204	+	161	0	113	0	131	0	279	9	203	8	214	6	696	0.033046	0.309768	2.28976e-05
genome	1	72433933	+	196	0	147	0	169	1	353	20	264	25	328	29	945	0.0783069	0.236977	1.21169e-13
genome	1	72433972	+	159	0	119	0	119	0	331	11	210	8	308	13	849	0.0376914	0.114004	3.85395e-06
genome	1	72750453	+	511	1	417	1	492	0	658	20	567	4	686	19	1911	0.0225013	0.0916923	6.71602e-09
genome	1	72752819	+	60	0	37	0	42	0	81	16	52	7	70	10	203	0.162562	0.531226	1.05217e-08
genome	1	72891168	+	374	0	327	0	359	0	735	21	575	19	725	20	2035	0.029484	0.112135	8.76446e-12
genome	1	72891234	+	143	0	120	0	130	0	305	14	226	7	267	13	798	0.0426065	0.132023	9.63683e-07
genome	1	72891294	+	210	0	130	0	187	0	396	39	259	26	395	46	1050	0.105714	0.285507	3.13331e-21
genome	1	74326422	+	54	0	48	0	45	0	120	12	73	8	99	3	292	0.0787671	0.257802	6.24387e-05
genome	1	74569078	+	137	0	94	0	107	1	205	15	151	8	186	8	542	0.0571956	0.23621	2.83542e-06
genome	1	74569208	+	91	0	80	0	87	0	183	10	139	8	199	6	521	0.0460653	0.15681	5.35847e-05
genome	1	74630805	+	22	0	13	0	32	0	40	11	28	4	27	2	95	0.178947	0.561593	5.97002e-05
genome	1	75188736	+	36	0	39	0	41	0	66	42	59	27	94	45	219	0.520548	0.864125	4.19029e-28
genome	1	77043382	+	63	0	54	0	44	0	113	5	93	7	99	11	305	0.0754098	0.210332	4.32758e-05
genome	1	78716034	+	56	0	55	0	52	0	112	22	99	13	107	18	318	0.166667	0.323068	5.91624e-11
genome	1	82863863	+	148	0	132	0	117	0	268	7	193	9	215	8	676	0.035503	0.0957032	1.31056e-05
genome	1	84990095	+	811	1	716	0	900	0	1138	53	1009	30	1193	61	3340	0.0431138	0.219255	1.16573e-33
genome	1	85763205	+	40	0	43	0	35	0	83	9	58	6	76	8	217	0.105991	0.281074	2.97387e-05
genome	1	85999645	+	363	0	262	0	346	0	637	23	455	15	585	23	1677	0.0363745	0.136539	5.26316e-13
genome	1	86005115	+	147	0	104	0	132	0	307	13	164	6	282	9	753	0.0371846	0.164465	8.40699e-06
genome	1	86017807	+	247	0	182	0	232	0	411	53	237	26	364	45	1012	0.12253	0.506863	3.50397e-29
genome	1	86019779	+	244	0	178	0	226	0	445	16	290	6	387	11	1122	0.0294118	0.0857431	2.45823e-07
genome	1	86046294	+	250	0	159	0	212	0	423	10	267	10	407	11	1097	0.0282589	0.0817111	7.81838e-07
genome	1	86055965	+	128	0	92	0	116	0	250	9	156	13	206	10	612	0.0522876	0.246322	6.16293e-07
genome	1	86056023	+	83	0	49	0	67	0	142	14	62	2	111	12	315	0.0888889	0.433427	6.82256e-07
genome	1	86454655	+	1753	1	1574	1	1669	0	2331	63	1866	43	2296	65	6493	0.0263361	0.0832972	4.5693e-40
genome	1	86456918	+	1613	0	1217	1	1628	2	1832	42	1234	24	2127	39	5193	0.0202195	0.0670759	7.20397e-25
genome	1	87142083	+	92	0	77	0	79	0	206	11	169	7	231	12	606	0.049505	0.180498	2.73728e-05
genome	1	87142112	+	118	0	93	0	130	0	297	18	190	9	308	19	795	0.0578616	0.278822	4.94367e-08
genome	1	87153629	+	267	1	189	0	282	1	515	16	296	4	464	10	1275	0.0235294	0.227891	7.56351e-05
genome	1	87441963	+	186	0	128	1	199	0	427	22	255	11	394	15	1076	0.0446097	0.136719	8.95864e-08
genome	1	93278054	+	99	0	50	0	66	0	101	16	60	8	80	3	241	0.112033	0.402744	1.60807e-08
genome	1	93429252	+	131	0	107	0	128	0	270	13	144	4	241	5	655	0.0335878	0.120576	5.04465e-05
genome	1	93429317	+	141	0	93	0	103	0	277	12	176	8	283	10	736	0.0407609	0.617243	1.01359e-05
genome	1	93431196	+	143	0	93	0	113	0	181	10	127	8	190	14	498	0.064257	0.303672	2.72041e-08
genome	1	93431505	+	8	0	6	0	4	0	12	10	3	2	6	4	21	0.761905	0.96131	5.396e-07
genome	1	96952208	+	527	0	370	0	519	0	811	27	639	12	817	32	2267	0.0313189	0.084703	7.08894e-16
genome	1	96952588	+	297	0	210	0	320	0	524	8	335	2	501	18	1360	0.0205882	0.0590683	1.50374e-06
genome	1	96952615	+	306	0	190	0	329	0	560	19	287	4	554	12	1401	0.0249822	0.0701175	7.81029e-08
genome	1	96952694	+	588	1	466	0	572	0	936	18	687	20	915	14	2538	0.0204886	0.4326	1.15644e-10
genome	1	96953410	+	732	0	615	0	784	0	1114	51	770	22	1131	47	3015	0.039801	0.136274	5.04729e-29
genome	1	99117358	+	209	0	102	0	178	0	321	12	217	2	287	6	825	0.0242424	0.22919	8.3074e-05
genome	1	99117770	+	187	0	114	0	171	0	294	13	199	5	278	9	771	0.0350195	0.148444	2.10497e-06
genome	1	105384065	+	194	0	132	0	183	0	288	22	170	8	344	24	802	0.0673317	0.226628	1.45467e-12
genome	1	105384088	+	194	1	116	0	163	0	294	10	156	8	337	13	787	0.0393901	0.119655	4.75288e-06
genome	1	109761284	+	414	1	311	1	402	0	718	47	525	35	645	50	1888	0.0699153	0.419403	3.44833e-25
genome	1	109761804	+	58	0	53	0	55	1	140	14	117	8	146	18	403	0.0992556	0.433596	7.58348e-06
genome	1	118249697	+	125	0	84	0	119	0	224	14	134	3	228	12	586	0.0494881	0.152268	1.95276e-06
genome	1	118605425	+	184	0	113	0	107	0	300	6	216	6	259	13	775	0.0322581	0.144605	2.43256e-05
genome	1	118606164	+	113	0	53	0	76	0	145	11	98	4	150	6	393	0.0534351	0.222392	3.41179e-05
genome	1	118610568	+	90	0	53	0	78	0	167	14	84	6	150	14	401	0.084788	0.414355	1.9576e-07
genome	1	118610636	+	207	0	134	0	145	0	381	18	231	15	303	10	915	0.0469945	0.17234	7.79235e-09
genome	1	118611856	+	202	0	127	0	182	0	369	10	274	6	334	8	977	0.024565	0.109143	3.73507e-05
genome	1	118612073	+	145	0	107	1	119	0	259	15	179	4	229	8	667	0.0404798	0.108584	5.86553e-05
genome	1	118612385	+	161	0	92	0	154	0	275	27	172	15	262	24	709	0.0930889	0.440079	3.10474e-14
genome	1	118612853	+	163	0	105	0	156	0	313	8	193	6	293	16	799	0.0375469	0.113521	2.34385e-06
genome	1	127411143	+	5	0	4	0	3	0	11	9	3	3	5	5	19	0.894737	1	6.44839e-07
genome	1	127966563	+	835	2	680	1	804	0	1253	63	913	49	1170	74	3336	0.0557554	0.270742	2.27365e-39
genome	1	131081998	+	115	0	78	0	112	0	242	7	144	7	254	16	640	0.046875	0.376718	6.67797e-06
genome	1	131088285	+	123	0	82	0	123	0	228	23	118	9	239	24	585	0.0957265	0.31483	5.50778e-12
genome	1	131088316	+	98	0	78	0	99	0	180	4	114	3	198	16	492	0.046748	0.143889	3.03927e-05
genome	1	131094079	+	109	0	72	0	147	0	206	8	101	4	205	7	512	0.0371094	0.350757	7.19552e-05
genome	1	131775175	+	14	0	9	0	13	0	31	11	17	8	21	12	69	0.449275	0.780638	1.00081e-07
genome	1	131846755	+	310	0	183	0	253	0	466	13	237	9	446	18	1149	0.0348129	0.114137	1.54949e-09
genome	1	131859015	+	366	0	257	0	340	1	568	30	379	19	519	26	1466	0.0511596	0.172651	5.23281e-16
genome	1	133059835	+	97	0	59	0	87	0	159	8	90	4	117	6	366	0.0491803	0.17945	8.81461e-05
genome	1	134037386	+	231	0	150	0	243	1	387	18	220	11	388	16	995	0.0452261	0.368525	3.8935e-09
genome	1	134037440	+	206	0	110	0	193	0	263	61	188	38	310	58	761	0.206307	0.806297	8.45895e-39
genome	1	134327850	+	244	0	177	0	200	0	406	14	328	5	367	18	1101	0.0336058	0.176791	5.2049e-08
genome	1	134333045	+	275	0	204	0	221	0	459	15	372	6	420	18	1251	0.0311751	0.165363	2.39398e-08
genome	1	134334097	+	215	0	180	0	229	1	346	11	321	8	348	12	1015	0.0305419	0.162346	3.85868e-06
genome	1	134334107	+	189	0	159	0	203	0	290	9	273	5	292	9	855	0.0269006	0.0769294	9.56035e-06
genome	1	134353819	+	198	0	119	0	170	0	275	13	213	8	280	24	768	0.0585938	0.221161	1.50671e-10
genome	1	134359392	+	174	0	126	1	171	0	361	11	254	9	349	17	964	0.0383817	0.14347	4.32462e-06
genome	1	134359653	+	69	0	31	0	52	0	114	5	58	7	94	13	266	0.093985	0.483862	8.03575e-06
genome	1	134446136	+	703	0	557	0	710	0	1129	41	759	26	1052	34	2940	0.0343537	0.209436	1.58116e-23
genome	1	134532191	+	172	0	110	0	143	0	299	6	178	9	250	5	727	0.0275103	0.380587	9.10215e-05
genome	1	134552875	+	266	0	196	0	233	0	457	8	294	5	377	10	1128	0.0203901	0.0621574	1.47053e-05
genome	1	134556440	+	144	0	138	0	135	0	271	8	198	0	232	12	701	0.0285307	0.0826638	7.96059e-05
genome	1	135160911	+	559	0	460	0	516	0	923	19	691	11	936	25	2550	0.0215686	0.097728	4.44628e-12
genome	1	135696497	+	182	0	117	0	132	0	266	8	229	7	285	15	780	0.0384615	0.103387	1.51524e-06
genome	1	136292681	+	51	0	28	0	25	0	57	17	45	8	52	17	154	0.272727	0.745696	2.75681e-11
genome	1	136292697	+	41	0	22	1	17	0	40	18	44	16	37	13	121	0.38843	0.832679	1.21219e-11
genome	1	136721257	+	127	0	102	0	143	0	270	12	165	3	237	12	672	0.0401786	0.381179	5.64206e-06
genome	1	143670119	+	51	0	42	0	57	0	105	11	49	4	115	9	269	0.0892193	0.514842	1.63428e-05
genome	1	146296378	+	48	0	31	0	50	0	100	9	35	8	100	4	235	0.0893617	0.235562	7.32477e-05
genome	1	150279407	+	65	0	30	0	64	0	106	14	39	4	120	10	265	0.10566	0.431785	1.09238e-06
genome	1	151220336	+	154	1	123	1	140	0	274	10	158	13	288	15	720	0.0527778	0.259086	2.43117e-06
genome	1	151235824	+	70	0	55	0	81	0	171	17	78	6	164	12	413	0.0847458	0.297676	4.27216e-07
genome	1	151236904	+	223	0	146	0	181	1	355	13	254	11	366	20	975	0.0451282	0.13839	3.43244e-08
genome	1	151236935	+	217	0	125	1	161	0	313	9	205	2	309	14	827	0.0302297	0.0885893	6.42054e-05
genome	1	151239043	+	176	0	134	0	171	0	330	13	192	9	312	15	834	0.0443645	0.117673	3.57212e-08
genome	1	152973725	+	13	0	8	0	10	0	15	8	10	4	10	4	35	0.457143	0.786846	4.74612e-06
genome	1	153785043	+	114	0	68	0	101	0	197	8	108	3	188	10	493	0.0425963	0.180969	6.21804e-05
genome	1	156193665	+	867	3	719	3	844	1	1216	28	956	24	1346	37	3518	0.0252985	0.136699	8.89847e-14
genome	1	156352898	+	170	0	110	0	144	0	308	15	223	14	284	15	815	0.0539877	0.142477	6.57692e-09
genome	1	156353557	+	83	0	55	0	88	0	152	6	79	3	157	11	388	0.0515464	0.158717	8.56601e-05
genome	1	163451555	+	156	1	159	0	163	0	254	34	239	23	271	40	764	0.126963	0.762225	1.13361e-20
genome	1	163451930	+	684	3	526	2	669	2	1082	26	842	14	1020	26	2944	0.0224185	0.0779239	1.53146e-08
genome	1	164264705	+	70	0	48	0	85	0	117	28	79	17	100	23	296	0.22973	0.536948	1.06066e-17
genome	1	167184952	+	69	1	45	0	51	0	92	8	60	7	101	8	253	0.0909091	0.35155	6.76505e-05
genome	1	170930624	+	38	3	32	12	39	6	71	35	40	17	59	30	170	0.482353	0.892256	5.42739e-07
genome	1	170930664	+	159	43	117	34	144	33	205	101	167	82	180	69	552	0.456522	0.792346	2.69232e-10
genome	1	171245401	+	93	0	65	0	79	0	154	11	98	7	157	9	409	0.0660147	0.282455	3.15129e-06
genome	1	171246197	+	67	0	59	0	57	0	133	8	65	3	146	14	344	0.0726744	0.22132	1.70519e-05
genome	1	171918546	+	126	0	79	0	126	0	233	12	136	8	171	8	540	0.0518519	0.255405	1.16871e-06
genome	1	171918763	+	129	0	105	0	111	1	225	15	143	12	198	13	566	0.0706714	0.255687	5.2817e-08
genome	1	171918777	+	157	0	119	0	125	0	253	10	176	3	238	8	667	0.0314843	0.0584504	4.51269e-05
genome	1	171935925	+	181	0	84	0	142	0	271	11	138	4	259	11	668	0.0389222	0.200958	3.51463e-06
genome	1	171940715	+	105	0	72	0	86	0	185	9	107	4	180	8	472	0.0444915	0.130295	7.76101e-05
genome	1	171944761	+	139	1	98	0	158	0	196	11	104	6	229	16	529	0.0623819	0.18861	1.02166e-07
genome	1	171949466	+	135	0	88	0	117	0	215	12	145	5	205	7	565	0.0424779	0.120065	1.01871e-05
genome	1	172016016	+	10	0	3	0	3	0	11	8	7	7	13	11	31	0.83871	0.991477	1.35368e-08
genome	1	172333494	+	239	0	198	0	246	0	385	9	285	8	380	11	1050	0.0266667	0.101874	6.98947e-07
genome	1	172334162	+	268	0	181	0	239	0	458	6	244	6	437	12	1139	0.0210711	0.0863528	1.08334e-05
genome	1	180396515	+	154	0	109	1	122	0	260	8	177	6	262	13	699	0.0386266	0.117121	6.46839e-05
genome	1	180401259	+	260	0	187	0	229	0	430	16	278	9	390	17	1098	0.0382514	0.130154	1.30847e-09
genome	1	180401283	+	380	0	254	0	337	0	588	13	374	12	554	9	1516	0.0224274	0.175672	4.23931e-08
genome	1	180401319	+	561	0	419	0	511	0	888	30	601	17	875	20	2364	0.0283418	0.107995	4.08533e-15
genome	1	180405190	+	198	0	140	0	187	0	313	14	171	11	311	11	795	0.045283	0.280562	8.55692e-09
genome	1	180406876	+	343	0	284	0	344	0	614	25	406	8	572	18	1592	0.0320352	0.0865973	2.08373e-11
genome	1	180406898	+	281	0	186	0	274	0	474	21	262	15	454	17	1190	0.0445378	0.136487	4.56907e-12
genome	1	180411404	+	405	0	302	0	316	0	624	19	417	14	602	15	1643	0.0292149	0.0976376	6.20997e-11
genome	1	180413543	+	340	0	263	0	317	0	562	16	499	13	590	14	1651	0.0260448	0.0706093	4.39055e-09
genome	1	180414835	+	307	0	258	0	308	1	554	14	431	15	531	12	1516	0.0270449	0.0771669	1.0602e-07
genome	1	180414870	+	263	0	192	0	274	0	517	13	314	3	470	17	1301	0.0253651	0.0879683	3.6275e-07
genome	1	180415617	+	247	0	209	0	258	1	450	11	306	4	438	14	1194	0.0242881	0.0843785	1.31904e-05
genome	1	180415958	+	347	0	237	0	349	0	518	12	316	6	583	12	1417	0.0211715	0.0972161	2.26742e-07
genome	1	180417130	+	270	1	185	0	227	0	454	13	275	6	428	8	1157	0.0233362	0.0711559	3.66918e-05
genome	1	180418901	+	272	0	191	0	332	0	476	12	270	6	499	8	1245	0.0208835	0.0635385	2.39522e-06
genome	1	180422286	+	342	2	304	0	282	0	552	21	408	14	527	33	1487	0.0457297	0.140322	1.02956e-12
genome	1	180424870	+	322	0	281	0	322	0	547	16	370	17	584	20	1501	0.0353098	0.214524	6.22316e-12
genome	1	180428108	+	344	0	222	0	307	0	663	57	352	44	596	49	1611	0.0931099	0.256739	4.73675e-30
genome	1	180428258	+	342	1	245	0	280	0	525	26	368	14	510	28	1403	0.0484676	0.149047	9.06302e-14
genome	1	180428449	+	187	0	112	0	156	0	343	8	208	4	271	9	822	0.0255474	0.246658	8.75424e-05
genome	1	180428473	+	120	0	68	0	111	0	233	10	132	5	179	11	544	0.0477941	0.409873	9.11151e-06
genome	1	180690037	+	123	0	104	0	103	0	234	9	152	7	200	5	586	0.0358362	0.187065	7.394e-05
genome	1	180693676	+	91	0	66	0	82	0	167	11	99	3	152	6	418	0.0478469	0.147079	9.96609e-05
genome	1	180720965	+	63	0	51	0	62	0	140	16	92	3	136	6	368	0.0679348	0.201466	4.33739e-05
genome	1	180722163	+	249	0	219	0	244	0	460	10	323	10	431	13	1214	0.0271829	0.146055	2.06395e-07
genome	1	180725428	+	314	0	264	0	332	0	539	37	487	30	561	41	1587	0.0680529	0.208161	1.38879e-22
genome	1	180732070	+	241	0	175	0	239	0	449	16	334	3	451	8	1234	0.0218801	0.0589557	9.20235e-06
genome	1	180733578	+	165	0	99	0	131	0	278	18	148	11	245	24	671	0.0789866	0.178724	9.99797e-12
genome	1	180735338	+	204	0	136	0	186	0	408	10	249	8	382	9	1039	0.0259865	0.0736923	1.40188e-05
genome	1	181959531	+	67	0	61	0	69	0	103	16	93	13	123	13	319	0.131661	0.725869	5.57479e-10
genome	1	185099732	+	237	0	168	0	234	0	379	9	226	1	397	11	1002	0.0209581	0.0556028	2.91813e-05
genome	1	185111900	+	134	0	101	0	148	0	242	37	115	11	277	37	634	0.134069	0.317662	3.64665e-19
genome	1	185117306	+	273	0	209	0	255	0	410	19	267	7	385	24	1062	0.047081	0.154601	2.20914e-12
genome	1	185118467	+	271	0	236	0	266	0	468	53	307	24	423	31	1198	0.0901503	0.254218	6.07958e-25
genome	1	185118476	+	272	0	223	0	262	0	460	6	288	5	418	13	1166	0.0205832	0.0627507	5.55076e-06
genome	1	185118497	+	244	0	186	0	237	0	420	14	241	6	397	22	1058	0.0396975	0.133562	8.78299e-10
genome	1	185128243	+	234	1	105	0	159	0	348	14	191	5	314	14	853	0.038687	0.114189	2.74048e-06
genome	1	185139186	+	238	0	157	0	182	0	370	10	208	3	397	7	975	0.0205128	0.0683009	8.52016e-05
genome	1	185139707	+	228	0	144	0	229	0	370	52	189	27	368	59	927	0.148867	0.421706	1.42458e-32
genome	1	185143407	+	182	0	133	0	159	0	378	15	232	14	331	11	941	0.042508	0.739349	6.16384e-08
genome	1	185143476	+	188	0	112	0	155	0	331	17	157	4	277	9	765	0.0392157	0.202261	6.68303e-07
genome	1	185145720	+	159	1	83	0	135	0	281	8	168	9	278	19	727	0.0495186	0.167993	2.9732e-06
genome	1	191561514	+	80	0	73	0	72	0	132	12	74	5	140	13	346	0.0867052	0.219241	1.76882e-07
genome	10	3985309	+	48	0	38	0	33	0	90	16	37	2	78	13	205	0.15122	0.298465	2.77553e-07
genome	10	3998214	+	111	0	95	0	97	0	197	13	113	8	215	8	525	0.0552381	0.170121	1.36482e-06
genome	10	4006857	+	146	1	116	0	162	0	246	12	141	7	250	10	637	0.0455259	0.14172	3.73294e-06
genome	10	4304539	+	207	0	157	0	203	0	433	15	231	7	424	15	1088	0.0340074	0.317182	1.46872e-07
genome	10	4305097	+	151	0	82	0	97	1	249	21	119	9	211	20	579	0.0863558	0.266167	1.44961e-09
genome	10	4305477	+	254	0	185	0	238	0	456	14	281	7	403	7	1140	0.0245614	0.112121	1.89248e-06
genome	10	4305531	+	170	0	127	0	163	0	301	6	224	7	288	10	813	0.0282903	0.164123	2.96102e-05
genome	10	4306138	+	271	0	201	0	246	0	431	12	260	6	457	15	1148	0.0287456	0.0907341	9.11901e-08
genome	10	4306678	+	195	0	135	0	146	0	320	18	185	18	297	22	802	0.0723192	0.353155	8.24811e-13
genome	10	6988662	+	114	0	98	1	120	0	173	13	141	12	183	13	497	0.0764588	0.316495	3.38243e-08
genome	10	9623473	+	252	1	133	0	213	0	430	35	254	16	364	34	1048	0.0811069	0.252764	1.98448e-16
genome	10	10219078	+	27	0	19	0	34	0	82	11	47	3	79	13	208	0.129808	0.469485	9.21067e-05
genome	10	11485074	+	264	0	198	0	246	0	408	34	337	16	442	24	1187	0.062342	0.191498	3.83851e-16
genome	10	12884647	+	235	0	145	0	200	0	360	15	293	2	380	10	1033	0.0261375	0.251991	5.25729e-06
genome	10	14399034	+	170	1	141	0	169	1	215	48	129	21	207	36	551	0.190563	0.431699	2.48862e-28
genome	10	16645007	+	269	2	226	1	301	0	535	43	400	37	452	41	1387	0.0872386	0.378977	3.65481e-21
genome	10	17993427	+	51	0	43	0	41	0	69	8	61	4	78	7	208	0.0913462	0.435201	5.30894e-05
genome	10	20084561	+	516	0	455	1	531	1	872	29	638	7	817	20	2327	0.0240653	0.208923	1.63949e-10
genome	10	20199427	+	226	0	148	0	218	0	399	18	239	5	351	5	989	0.0283114	0.0818954	1.70725e-06
genome	10	20215832	+	122	0	66	0	98	0	189	9	103	4	191	10	483	0.047619	0.133689	1.85212e-05
genome	10	21872943	+	328	2	201	0	249	0	498	19	296	6	474	14	1268	0.0307571	0.0904178	8.37198e-07
genome	10	21874977	+	158	0	102	0	149	0	320	9	183	4	307	13	810	0.0320988	0.100952	2.11352e-05
genome	10	21875260	+	251	0	184	0	237	0	445	8	268	3	388	13	1101	0.0217984	0.0723207	9.82065e-06
genome	10	25984086	+	823	1	778	0	903	0	1334	40	999	21	1390	46	3723	0.0287403	0.0679169	3.01059e-23
genome	10	25984451	+	1010	3	621	3	973	3	1443	28	881	12	1462	43	3786	0.0219229	0.0701133	3.30829e-11
genome	10	27950894	+	19	0	14	0	23	0	45	13	21	8	48	11	114	0.280702	0.682707	5.10036e-07
genome	10	28906875	+	439	0	282	0	441	0	728	61	471	29	734	43	1933	0.068805	0.437714	1.10107e-28
genome	10	30687148	+	38	4	33	13	38	6	72	35	39	16	59	30	170	0.476471	0.889581	4.68733e-06
genome	10	30687188	+	159	44	117	34	145	33	207	101	164	79	183	69	554	0.449458	0.786633	1.42618e-09
genome	10	31124509	+	240	0	162	0	216	1	397	17	257	16	406	13	1060	0.0433962	0.41125	8.49153e-09
genome	10	36873043	+	181	0	118	0	160	0	310	13	154	4	271	7	735	0.0326531	0.0987908	7.56831e-06
genome	10	36873969	+	67	0	33	0	50	0	98	25	42	14	92	20	232	0.25431	0.894218	5.7903e-15
genome	10	41395556	+	220	0	160	0	166	0	356	18	324	16	356	21	1036	0.0530888	0.163507	4.64655e-11
genome	10	41395583	+	148	0	118	0	107	0	246	10	229	9	236	5	711	0.0337553	0.100719	3.50814e-05
genome	10	42409189	+	179	0	130	0	171	0	338	9	196	5	314	7	848	0.0247642	0.239472	7.40899e-05
genome	10	42410664	+	203	0	130	0	177	0	355	16	215	4	302	9	872	0.0332569	0.0898177	1.33129e-06
genome	10	44728721	+	541	0	425	1	518	0	821	19	612	15	868	20	2301	0.0234681	0.0959275	3.73656e-11
genome	10	44728914	+	123	0	97	0	132	0	172	9	154	3	169	7	495	0.0383838	0.116313	3.19231e-05
genome	10	45031655	+	124	0	69	0	130	0	189	15	112	8	176	11	477	0.0712788	0.307474	1.41347e-08
genome	10	45751401	+	159	1	187	0	155	0	308	12	293	8	293	11	894	0.0346756	0.103849	1.04697e-05
genome	10	45751595	+	242	0	202	0	254	0	438	8	330	5	427	12	1195	0.0209205	0.186568	9.22097e-06
genome	10	45751783	+	530	0	395	2	497	2	783	18	571	12	790	19	2144	0.0228545	0.138061	1.05214e-07
genome	10	53478473	+	128	0	111	0	127	0	208	6	140	4	222	10	570	0.0350877	0.105246	4.30836e-05
genome	10	58297710	+	99	0	62	0	82	0	183	12	90	4	146	5	419	0.0501193	0.160293	5.57678e-05
genome	10	59734570	+	13	0	8	0	15	0	23	21	10	9	21	18	54	0.888889	1	3.03199e-19
genome	10	60136387	+	228	0	193	0	254	0	352	11	319	12	409	15	1080	0.0351852	0.29895	7.5295e-09
genome	10	60138261	+	173	0	135	0	172	0	345	21	199	7	295	10	839	0.045292	0.412185	2.4998e-08
genome	10	61145597	+	310	1	202	0	293	0	441	12	370	16	430	19	1241	0.0378727	0.163009	8.75488e-10
genome	10	61146043	+	164	0	117	0	161	0	276	6	218	7	279	9	773	0.0284605	0.0865433	4.27887e-05
genome	10	61259224	+	97	0	73	0	80	0	164	8	94	1	182	12	440	0.0477273	0.333659	6.60097e-05
genome	10	61503369	+	177	0	94	0	167	0	350	15	154	9	293	13	797	0.0464241	0.158064	6.76462e-08
genome	10	61509639	+	291	0	222	0	288	1	516	17	334	6	494	11	1344	0.0252976	0.0685917	1.48412e-06
genome	10	61527641	+	119	0	97	0	106	0	230	15	182	4	247	6	659	0.0379363	0.114821	4.11281e-05
genome	10	61538277	+	57	0	39	0	53	0	93	52	63	41	88	45	244	0.565574	0.838208	9.98027e-39
genome	10	61906925	+	418	0	301	0	350	0	713	20	459	9	601	25	1773	0.0304569	0.092449	6.31729e-12
genome	10	61907033	+	290	1	185	2	303	1	480	18	293	7	475	10	1248	0.0280449	0.0836877	8.19467e-05
genome	10	61907806	+	236	0	148	0	191	0	398	19	195	13	371	12	964	0.0456432	0.150269	7.90044e-10
genome	10	61908181	+	337	0	325	0	324	0	630	13	540	5	647	19	1817	0.0203632	0.0708261	9.49414e-08
genome	10	62786552	+	42	0	32	0	50	0	72	7	40	4	60	7	172	0.104651	0.566867	3.84744e-05
genome	10	63123734	+	86	0	49	0	64	0	179	12	86	6	152	11	417	0.0695444	0.455665	8.79123e-06
genome	10	63150310	+	94	0	74	0	69	0	223	15	111	7	225	14	559	0.0644007	0.185849	2.10256e-06
genome	10	69161270	+	93	0	75	1	92	1	188	12	136	10	163	10	487	0.0657084	0.18621	6.46115e-05
genome	10	72491817	+	157	0	118	0	161	0	296	8	162	6	335	9	793	0.0290038	0.0985551	3.74676e-05
genome	10	72492937	+	178	0	159	0	199	0	277	12	163	7	314	10	754	0.0384615	0.116572	1.37251e-07
genome	10	75188137	+	76	1	62	0	54	0	144	31	102	17	154	36	400	0.21	0.392935	6.61184e-15
genome	10	75188174	+	53	0	33	0	39	0	134	9	65	10	112	10	311	0.0932476	0.578343	3.74413e-05
genome	10	75773245	+	541	0	442	0	508	0	885	19	788	15	892	24	2565	0.0226121	0.0601849	2.25543e-12
genome	10	75773489	+	754	0	480	1	741	0	1139	34	701	16	1130	14	2970	0.0215488	0.0736324	1.38154e-13
genome	10	77451228	+	7	0	4	0	7	0	8	7	6	5	11	10	25	0.88	1	2.18621e-09
genome	10	77452604	+	144	0	104	0	125	0	282	36	189	20	270	36	741	0.124157	0.376229	6.71835e-18
genome	10	77452656	+	176	0	124	0	199	0	329	11	235	2	332	11	896	0.0267857	0.144096	2.173e-05
genome	10	77452725	+	198	0	88	0	173	0	275	26	146	16	228	19	649	0.0939908	0.611907	1.97786e-15
genome	10	77453177	+	412	0	331	0	398	0	661	18	517	12	686	19	1864	0.0262876	0.0747601	5.39445e-11
genome	10	77887717	+	147	0	92	0	108	0	245	11	145	10	203	13	593	0.0573356	0.164679	1.09905e-07
genome	10	77899358	+	193	0	117	0	162	0	363	19	222	3	339	9	924	0.0335498	0.100018	2.33941e-06
genome	10	79540377	+	281	0	223	0	216	0	567	18	437	13	549	17	1553	0.0309079	0.137381	9.07376e-09
genome	10	79546659	+	387	1	302	0	359	0	670	16	532	12	608	13	1810	0.0226519	0.0614054	1.00964e-07
genome	10	79547396	+	334	0	256	0	334	0	551	12	383	5	618	20	1552	0.0238402	0.0725517	2.65321e-08
genome	10	79655374	+	53	0	31	0	58	0	96	10	44	3	75	10	215	0.106977	0.646837	5.23955e-06
genome	10	79695741	+	437	0	334	0	347	0	689	26	518	24	662	30	1869	0.0428036	0.114525	2.68279e-17
genome	10	79697874	+	415	1	338	1	373	0	659	14	478	8	591	24	1728	0.0266204	0.167922	1.43875e-08
genome	10	79699013	+	741	0	637	1	737	0	1186	32	902	14	1192	33	3280	0.0240854	0.0669095	1.88649e-16
genome	10	79699815	+	498	1	397	0	502	0	817	36	554	23	796	30	2167	0.0410706	0.125198	1.04726e-18
genome	10	79724569	+	359	1	305	0	384	0	544	21	442	21	611	20	1597	0.0388228	0.122125	4.20747e-13
genome	10	79724785	+	193	2	107	0	174	0	242	16	185	7	243	14	670	0.0552239	0.23882	2.40935e-07
genome	10	79801126	+	122	0	107	0	125	0	271	28	189	12	248	17	708	0.0805085	0.487431	4.18045e-11
genome	10	79801815	+	193	0	156	0	204	0	340	16	271	10	340	18	951	0.0462671	0.142044	1.19708e-09
genome	10	79801928	+	207	0	130	0	169	0	308	14	200	4	323	11	831	0.0348977	0.109368	8.48781e-07
genome	10	79801935	+	214	0	144	0	192	0	328	8	211	5	354	7	893	0.0223964	0.216985	6.25263e-05
genome	10	79801941	+	239	0	147	0	211	0	361	9	222	11	391	10	974	0.0308008	0.0933523	4.97218e-07
genome	10	79802234	+	182	0	136	0	182	0	332	11	244	5	296	6	872	0.0252294	0.0798548	4.23714e-05
genome	10	79829119	+	79	0	52	0	59	0	91	13	45	4	93	16	229	0.144105	0.359411	7.09768e-10
genome	10	79889519	+	383	1	409	0	407	0	710	25	650	21	708	19	2068	0.0314313	0.0927483	2.14684e-12
genome	10	79890381	+	536	0	436	1	546	0	925	26	704	7	916	19	2545	0.0204322	0.0647352	4.63232e-10
genome	10	79890602	+	338	0	266	0	356	1	575	19	446	13	569	17	1590	0.0308176	0.257806	1.32397e-09
genome	10	79890913	+	598	0	438	3	554	2	894	20	643	22	895	23	2432	0.026727	0.159278	6.33943e-10
genome	10	79981088	+	412	0	295	1	395	0	669	13	468	11	638	18	1775	0.023662	0.0641567	2.22756e-08
genome	10	79981131	+	428	0	284	0	397	0	733	10	487	18	705	13	1925	0.0212987	0.0965161	6.77041e-09
genome	10	79981391	+	352	1	215	0	347	0	554	114	313	75	515	91	1382	0.202605	0.609548	7.71608e-66
genome	10	79993569	+	101	0	57	0	84	0	167	9	86	5	142	5	395	0.0481013	0.267308	9.62517e-05
genome	10	80006114	+	144	1	105	0	141	0	227	10	138	4	262	16	627	0.0478469	0.147079	4.88515e-06
genome	10	80113461	+	227	0	154	0	163	0	378	11	227	3	351	14	956	0.0292887	0.383696	2.87735e-06
genome	10	80118940	+	119	0	89	0	98	0	238	11	157	4	201	9	596	0.0402685	0.08739	4.08506e-05
genome	10	80123488	+	378	0	314	1	362	0	602	22	461	12	580	24	1643	0.0353013	0.205861	5.30926e-12
genome	10	80129700	+	654	1	496	0	592	0	907	29	580	18	872	24	2359	0.0300975	0.0912767	1.78649e-16
genome	10	80451128	+	93	1	75	0	80	0	193	12	133	11	168	10	494	0.0668016	0.204549	1.27939e-05
genome	10	80630385	+	36	1	12	0	32	0	47	17	28	14	56	23	131	0.412214	0.856735	8.74083e-13
genome	10	80637336	+	149	0	99	0	104	0	260	16	151	7	229	9	640	0.05	0.21301	6.11827e-07
genome	10	80664972	+	444	1	305	0	431	0	720	55	450	34	714	54	1884	0.0759023	0.249954	4.23222e-30
genome	10	80906013	+	116	0	76	0	94	0	194	17	89	6	218	11	501	0.0678643	0.157567	1.40568e-07
genome	10	80909137	+	152	0	115	0	149	0	299	15	145	10	270	9	714	0.047619	0.183978	1.23637e-07
genome	10	80915909	+	113	0	79	0	98	0	226	13	141	6	192	9	559	0.0500894	0.148096	6.53111e-06
genome	10	80917740	+	159	0	122	0	142	0	321	12	179	4	274	5	774	0.0271318	0.0777457	9.57916e-05
genome	10	80944704	+	149	0	107	0	133	0	260	14	199	9	261	10	720	0.0458333	0.317546	4.95068e-07
genome	10	80955148	+	155	0	123	0	157	0	258	11	164	4	272	11	694	0.037464	0.148376	2.66291e-06
genome	10	80958431	+	96	0	68	0	62	0	149	15	92	3	155	16	396	0.0858586	0.279805	1.25407e-07
genome	10	80959475	+	117	0	105	0	104	0	233	9	141	4	209	9	583	0.0377358	0.114152	4.93531e-05
genome	10	81013884	+	9	0	19	4	7	2	78	55	69	54	67	50	214	0.742991	0.995808	1.39584e-10
genome	10	81013954	+	1095	0	925	0	1048	0	1593	54	1337	37	1505	50	4435	0.0317926	0.168289	2.52285e-33
genome	10	81014043	+	1796	1	1685	0	1828	2	2382	103	2317	74	2448	128	7147	0.0426752	0.130447	6.29284e-70
genome	10	81014646	+	1007	1	871	0	975	0	1415	41	1172	24	1391	30	3978	0.0238813	0.135727	1.26256e-21
genome	10	81014668	+	915	0	764	1	837	0	1324	95	1004	51	1221	72	3549	0.0614258	0.194795	1.00395e-50
genome	10	81014985	+	1055	2	884	1	973	0	1567	52	1297	45	1501	57	4365	0.0352806	0.0874178	9.69637e-31
genome	10	81015760	+	781	3	625	1	684	0	1175	345	958	295	982	285	3115	0.29695	0.853407	2.7405e-226
genome	10	81015778	+	907	0	734	0	792	1	1351	42	1158	30	1162	30	3671	0.0277853	0.0752889	7.17147e-22
genome	10	81016661	+	1094	0	965	2	977	1	1470	52	1245	54	1415	53	4130	0.0384988	0.283868	1.37708e-34
genome	10	81016853	+	991	0	802	1	929	0	1503	41	1257	17	1470	32	4230	0.0212766	0.103081	9.60686e-19
genome	10	81017159	+	644	0	499	4	533	1	938	34	796	28	863	29	2597	0.0350404	0.687035	7.61813e-15
genome	10	81221758	+	171	0	128	0	143	0	285	7	207	4	290	13	782	0.0306905	0.0901872	1.87902e-05
genome	10	81400712	+	382	0	278	1	379	1	630	51	403	35	595	48	1628	0.0823096	0.26434	3.18711e-27
genome	10	81401437	+	437	0	396	0	412	0	817	23	717	21	774	25	2308	0.029896	0.0874295	8.22135e-14
genome	10	81401609	+	169	0	113	0	149	0	351	18	210	3	294	6	855	0.0315789	0.0932574	1.4216e-05
genome	10	81401645	+	326	1	256	0	309	0	612	18	477	7	554	8	1643	0.0200852	0.0612198	7.02326e-06
genome	10	82485063	+	105	0	92	0	100	0	212	9	140	9	176	5	528	0.0435606	0.199461	2.92032e-05
genome	10	82711511	+	155	0	106	0	121	0	276	22	164	15	246	21	686	0.0845481	0.473384	2.8657e-12
genome	10	82713166	+	206	1	169	0	199	1	375	19	228	11	324	17	927	0.0507012	0.250791	1.79546e-08
genome	10	82713176	+	212	0	177	0	208	1	372	17	232	5	345	10	949	0.0337197	0.100598	1.83099e-06
genome	10	82717640	+	322	1	241	0	295	0	510	15	373	8	461	9	1344	0.0238095	0.145675	1.62401e-06
genome	10	82721026	+	223	0	140	0	183	0	372	35	223	17	326	28	921	0.0868621	0.456343	1.75515e-17
genome	10	82726276	+	200	0	165	1	209	0	355	12	222	5	358	18	935	0.0374332	0.251972	6.05683e-07
genome	10	82731841	+	220	1	176	0	190	0	429	9	271	6	389	12	1089	0.0247934	0.0694435	8.45378e-05
genome	10	82790524	+	89	0	68	0	106	0	207	25	91	10	196	32	494	0.135628	0.548734	7.08307e-14
genome	10	85149579	+	269	0	163	0	259	0	484	9	266	10	468	18	1218	0.0303777	0.178188	4.91745e-08
genome	10	85149792	+	91	0	50	0	101	0	179	11	127	8	157	5	463	0.0518359	0.159619	3.35711e-05
genome	10	85149946	+	89	1	75	0	112	0	204	16	162	9	172	17	538	0.0780669	0.236319	2.54055e-07
genome	10	89714182	+	12	0	8	0	4	0	20	12	8	1	16	6	44	0.431818	0.75286	4.2034e-05
genome	10	93314321	+	90	0	98	0	79	0	189	35	123	31	180	48	492	0.231707	0.619953	1.73508e-24
genome	10	93318835	+	80	0	46	0	81	0	150	11	83	5	123	4	356	0.0561798	0.172997	8.53062e-05
genome	10	93614585	+	279	0	187	0	255	0	514	9	277	7	463	12	1254	0.0223285	0.0776149	2.67967e-06
genome	10	93614796	+	134	0	117	0	139	0	199	13	195	8	188	10	582	0.0532646	0.45549	8.94782e-08
genome	10	102655540	+	671	0	501	0	668	0	986	45	848	39	1027	56	2861	0.0489339	0.24362	1.62996e-31
genome	10	105902168	+	57	0	35	0	51	0	105	15	83	8	93	12	281	0.124555	0.432867	2.59345e-07
genome	10	105902361	+	53	0	23	0	52	0	91	16	45	5	78	8	214	0.135514	0.503863	5.78883e-07
genome	10	110962023	+	880	0	669	1	800	0	1294	80	911	50	1277	83	3482	0.0611717	0.207897	1.22478e-47
genome	10	110962290	+	1191	0	1005	1	1086	0	1657	41	1436	34	1528	37	4621	0.0242372	0.0657193	2.16198e-25
genome	10	111328796	+	640	0	468	1	616	1	970	30	638	13	956	23	2564	0.025741	0.162954	5.1275e-13
genome	10	111329415	+	643	4	526	1	606	1	978	34	824	16	1010	22	2812	0.0256046	0.123468	3.77052e-10
genome	10	111332353	+	267	0	166	0	233	0	396	11	241	3	398	13	1035	0.026087	0.062434	1.30588e-06
genome	10	111332408	+	233	0	148	0	194	0	380	9	161	2	388	10	929	0.022605	0.0675897	3.69948e-05
genome	10	111332436	+	223	2	120	0	198	0	394	9	152	3	384	19	930	0.0333333	0.295036	4.59734e-05
genome	10	111332949	+	281	0	202	0	250	0	432	11	272	5	446	8	1150	0.0208696	0.167774	6.59653e-06
genome	10	111333827	+	142	0	99	0	124	0	221	5	141	8	220	8	582	0.0360825	0.35423	3.15112e-05
genome	10	115105857	+	236	0	218	0	235	0	356	12	317	3	350	13	1023	0.0273705	0.074176	4.70858e-07
genome	10	115105936	+	746	1	596	0	635	0	1055	65	731	35	1028	79	2814	0.0636105	0.301338	2.97387e-41
genome	10	115106296	+	283	1	232	0	258	0	469	16	395	4	492	8	1356	0.020649	0.0592446	3.33465e-05
genome	10	120059756	+	132	0	73	0	93	0	196	6	127	8	190	11	513	0.0487329	0.150898	8.54262e-06
genome	10	126833967	+	107	0	79	0	87	0	224	8	119	8	149	10	492	0.0528455	0.453351	8.13793e-06
genome	10	126899579	+	435	1	333	0	412	0	773	52	587	38	814	46	2174	0.0625575	0.187327	2.68532e-25
genome	10	126900099	+	572	0	494	0	562	0	983	102	765	78	965	100	2713	0.103207	0.346201	2.26999e-60
genome	10	126900221	+	340	0	242	1	338	0	559	13	323	5	546	11	1428	0.0203081	0.0783661	6.09608e-06
genome	10	126901034	+	888	0	781	1	865	0	1383	36	1192	15	1331	37	3906	0.0225294	0.0613075	1.8991e-18
genome	10	126901100	+	957	0	809	0	956	1	1243	44	1056	43	1286	50	3585	0.0382148	0.355431	4.79452e-33
genome	10	126901841	+	839	0	680	0	815	0	1121	78	944	62	1196	87	3261	0.0696105	0.279618	1.9971e-55
genome	10	126902811	+	447	2	352	2	422	1	699	46	530	28	730	53	1959	0.064829	0.456604	1.25483e-21
genome	10	126903065	+	182	1	116	0	166	0	395	11	227	8	343	17	965	0.0373057	0.112714	7.61166e-06
genome	10	127113632	+	222	0	146	0	200	0	356	8	220	4	346	11	922	0.0249458	0.13493	1.44374e-05
genome	10	127117332	+	256	1	170	1	250	0	379	24	241	12	451	19	1071	0.0513539	0.253413	3.17527e-10
genome	10	127117617	+	286	1	268	0	318	0	523	11	438	11	523	14	1484	0.0242588	0.0929694	7.35305e-07
genome	10	127854042	+	112	0	59	0	95	0	170	19	111	8	150	14	431	0.0951276	0.352458	1.28444e-09
genome	10	127858762	+	80	0	33	0	86	0	108	16	43	8	134	19	285	0.150877	0.372327	3.12626e-11
genome	10	127883555	+	460	1	298	0	466	0	748	38	472	26	757	48	1977	0.0566515	0.285844	4.77551e-23
genome	10	127883597	+	253	0	161	0	222	0	413	8	211	5	373	10	997	0.0230692	0.590295	1.06624e-05
genome	10	127884128	+	667	1	481	0	756	0	937	24	594	20	1113	39	2644	0.0313918	0.0582772	5.91146e-19
genome	10	127895021	+	288	0	163	0	264	0	543	14	283	4	517	13	1343	0.0230827	0.0980371	1.58725e-06
genome	10	127895139	+	518	0	441	0	490	0	954	27	740	16	927	21	2621	0.0244182	0.0662102	4.43932e-13
genome	10	127904568	+	680	0	464	0	620	0	985	63	630	30	927	30	2542	0.0483871	0.218225	2.0255e-29
genome	10	127908010	+	601	1	551	1	606	1	917	18	695	15	868	31	2480	0.0258065	0.246624	3.46207e-12
genome	10	127908021	+	626	1	546	0	624	1	939	19	693	10	931	26	2563	0.0214592	0.0824572	4.73642e-11
genome	10	127912261	+	509	0	298	0	442	0	818	40	397	15	735	28	1950	0.0425641	0.216892	7.14305e-19
genome	10	127919270	+	1215	1	1139	0	1249	1	1956	62	1817	44	1844	46	5617	0.0270607	0.0774948	1.62839e-30
genome	10	127919940	+	1057	1	891	1	1017	1	1428	45	1048	33	1468	42	3944	0.030426	0.24911	7.16175e-26
genome	10	127921041	+	1493	0	1266	0	1484	1	1963	27	1740	43	2014	51	5717	0.0211649	0.0702211	2.07084e-28
genome	10	127921401	+	1439	0	1268	2	1487	1	1954	64	1765	63	1977	66	5696	0.0338834	0.285926	1.41508e-42
genome	10	127921963	+	1625	0	1593	1	1601	2	2167	87	2192	72	2180	79	6539	0.036397	0.109665	2.50982e-53
genome	10	127921973	+	1670	2	1598	0	1640	1	2185	81	2159	57	2176	56	6520	0.0297546	0.0614898	1.59219e-43
genome	10	127922170	+	916	1	756	0	857	0	1272	32	1086	15	1289	32	3647	0.0216616	0.0550452	2.01182e-17
genome	10	127922201	+	923	1	704	0	856	1	1315	132	944	109	1176	93	3435	0.0972344	0.621133	1.07717e-78
genome	10	127924860	+	1163	1	987	1	1172	2	1601	35	1314	30	1522	27	4437	0.0207347	0.0758049	3.85109e-18
genome	10	127946927	+	136	0	80	0	102	0	239	9	137	9	220	12	596	0.0503356	0.148685	2.06831e-06
genome	10	127959984	+	147	0	110	0	158	0	287	10	204	6	275	7	766	0.0300261	0.159876	4.20998e-05
genome	10	127963465	+	93	0	54	0	86	0	189	8	110	8	158	6	457	0.04814	0.411914	9.71306e-05
genome	10	128075762	+	111	0	93	0	104	0	204	10	135	5	199	8	538	0.0427509	0.114391	2.52568e-05
genome	10	128079193	+	105	0	61	0	75	0	174	10	129	3	149	9	452	0.0486726	0.149695	6.88087e-05
genome	10	128159463	+	205	0	173	0	187	1	391	12	258	6	350	15	999	0.033033	0.098252	4.08586e-06
genome	10	128159476	+	182	0	129	0	156	0	333	7	207	5	295	9	835	0.0251497	0.257254	8.10727e-05
genome	10	128188930	+	199	0	136	1	185	0	379	12	234	9	352	17	965	0.0393782	0.119616	8.69419e-07
genome	10	128195857	+	245	1	172	0	175	0	384	18	251	3	387	8	1022	0.0283757	0.13544	1.79331e-05
genome	10	128195884	+	292	0	201	0	241	0	472	20	353	12	482	22	1307	0.041316	0.126003	2.35738e-11
genome	10	128195941	+	141	0	111	0	153	0	281	13	176	0	224	10	681	0.0337739	0.111965	1.89246e-05
genome	10	128196986	+	244	0	138	0	187	1	350	15	200	4	397	8	947	0.0285111	0.0908508	2.98524e-05
genome	10	128197754	+	254	0	161	0	255	0	463	11	324	14	420	9	1207	0.028169	0.0909849	2.55326e-07
genome	10	128197863	+	233	0	149	0	217	0	374	12	310	13	351	13	1035	0.036715	0.110733	2.25858e-08
genome	10	128601759	+	120	0	93	0	112	0	238	7	180	7	248	9	666	0.0345345	0.0931711	9.44206e-05
genome	10	129501109	+	376	0	307	0	401	1	656	20	484	15	646	23	1786	0.0324748	0.123346	1.84461e-11
genome	11	3923272	+	346	1	251	0	321	1	529	8	385	16	548	15	1462	0.0266758	0.12785	6.2282e-07
genome	11	4622326	+	41	0	24	0	33	0	83	10	51	8	72	15	206	0.160194	0.411155	1.06836e-06
genome	11	4937047	+	108	0	74	0	93	0	159	10	99	4	142	9	400	0.0575	0.175367	4.5501e-06
genome	11	5909343	+	135	0	80	0	124	0	224	17	112	5	210	10	546	0.0586081	0.281653	1.35514e-07
genome	11	6355812	+	61	0	38	1	39	0	68	54	65	56	61	47	194	0.809278	0.991976	4.36694e-57
genome	11	6368239	+	1449	0	1234	0	1285	0	2180	70	1858	50	2194	73	6232	0.0309692	0.0911517	1.55768e-42
genome	11	6368296	+	1107	0	900	3	1033	2	1403	84	1149	54	1368	73	3920	0.0538265	0.542752	1.38853e-46
genome	11	6369531	+	2011	0	1914	0	2031	1	2752	111	2367	91	2729	91	7848	0.0373344	0.119223	1.64308e-71
genome	11	6369554	+	1977	0	1782	1	1936	2	2616	57	2192	49	2531	42	7339	0.0201662	0.0873853	3.13116e-33
genome	11	9068605	+	208	0	139	0	181	0	341	17	314	9	375	11	1030	0.0359223	0.108066	1.79021e-07
genome	11	9069402	+	623	0	557	0	581	0	1003	32	836	24	1003	27	2842	0.0292048	0.111125	2.60782e-18
genome	11	9069443	+	430	0	419	0	404	0	630	19	548	16	659	16	1837	0.0277627	0.105885	2.27844e-12
genome	11	9081654	+	471	0	416	0	479	1	766	20	640	7	789	25	2195	0.0236902	0.229417	1.9867e-10
genome	11	9085188	+	365	0	284	0	366	0	633	33	434	21	583	28	1650	0.049697	0.131876	3.84094e-18
genome	11	12598284	+	171	0	180	0	133	1	297	12	271	10	254	14	822	0.0437956	0.143429	6.35333e-07
genome	11	22950886	+	440	1	292	0	405	0	680	12	351	6	636	17	1667	0.0209958	0.0915298	1.65455e-07
genome	11	22953251	+	476	1	350	0	487	0	803	24	512	13	760	13	2075	0.0240964	0.147796	3.7014e-10
genome	11	23217734	+	209	1	145	0	178	0	373	8	196	8	360	12	929	0.0301399	0.309724	3.05874e-05
genome	11	23226468	+	235	0	121	0	182	0	424	8	187	5	359	12	970	0.0257732	0.0698765	1.44766e-05
genome	11	23234292	+	250	0	158	0	233	0	391	25	208	4	422	17	1021	0.0450539	0.145362	1.23644e-10
genome	11	23331275	+	99	0	68	0	73	0	178	12	118	8	142	12	438	0.0730594	0.290481	5.57875e-07
genome	11	23338490	+	48	0	20	0	17	0	72	6	39	9	64	14	175	0.165714	0.389033	4.47792e-06
genome	11	26737200	+	527	0	468	0	519	1	785	41	742	29	787	30	2314	0.0432152	0.115573	2.41125e-21
genome	11	29138142	+	57	0	35	0	60	0	101	11	53	0	93	8	247	0.0769231	0.233168	8.38228e-05
genome	11	29643138	+	186	0	130	0	140	0	332	13	239	6	328	16	899	0.0389321	0.118136	4.62246e-07
genome	11	29692668	+	152	0	93	1	138	0	302	20	129	11	272	17	703	0.0682788	0.523704	8.92976e-09
genome	11	30760992	+	127	0	67	0	86	0	204	13	110	3	184	7	498	0.0461847	0.141781	2.89948e-05
genome	11	30795851	+	92	0	58	0	71	0	167	10	84	4	157	9	408	0.0563725	0.174384	3.7899e-05
genome	11	30811353	+	122	0	94	0	110	0	225	8	108	7	234	13	567	0.0493827	0.151329	2.33296e-06
genome	11	30829990	+	113	0	48	0	93	0	178	7	59	3	151	8	388	0.0463918	0.210264	9.86062e-05
genome	11	30830117	+	157	0	97	0	128	0	178	38	100	16	167	29	445	0.186517	0.822179	9.17816e-25
genome	11	32155644	+	116	0	106	0	114	0	252	10	191	12	223	10	666	0.048048	0.147718	1.62935e-06
genome	11	32158970	+	57	0	36	0	43	0	99	8	57	7	101	12	257	0.105058	0.322905	6.33655e-06
genome	11	32694979	+	72	0	55	0	52	0	113	7	79	3	109	11	301	0.0697674	0.213076	4.23136e-05
genome	11	40624749	+	213	1	148	0	187	0	381	10	291	8	317	15	989	0.033367	0.0619723	5.14987e-06
genome	11	40624951	+	339	1	291	2	333	0	569	17	445	18	592	19	1606	0.0336239	0.100271	1.22663e-08
genome	11	41389623	+	345	1	218	0	337	0	608	14	355	4	560	18	1523	0.0236376	0.0880538	6.86203e-07
genome	11	41390477	+	405	0	283	1	381	0	685	19	446	11	674	20	1805	0.0277008	0.217578	1.2237e-09
genome	11	41390892	+	722	0	612	1	709	1	1110	60	853	34	1063	39	3026	0.0439524	0.134595	7.58987e-28
genome	11	44450804	+	69	0	50	0	61	0	148	11	74	4	141	8	363	0.0633609	0.191234	7.47336e-05
genome	11	45720086	+	2255	0	2206	2	2193	1	2887	170	2998	139	2772	155	8657	0.0535982	0.203953	7.44767e-112
genome	11	45720147	+	876	0	759	0	818	1	1145	212	982	165	984	167	3111	0.174863	0.535664	1.14832e-145
genome	11	45720227	+	173	0	164	0	153	1	273	11	281	2	278	15	832	0.0336538	0.0979689	2.28592e-05
genome	11	45720277	+	628	1	748	0	631	2	997	33	1169	37	1017	39	3183	0.0342444	0.102385	5.07033e-20
genome	11	45720669	+	319	0	350	1	307	0	396	23	426	19	417	23	1239	0.0524617	0.15183	5.68212e-16
genome	11	45720734	+	358	1	302	2	332	1	647	39	636	36	659	52	1942	0.0653965	0.200467	7.90515e-19
genome	11	45720813	+	1865	1	1552	3	1791	2	2519	78	2187	46	2483	57	7189	0.0251774	0.0682665	1.92112e-35
genome	11	45800847	+	159	0	96	0	143	0	201	8	127	6	225	10	553	0.0433996	0.40103	1.80414e-06
genome	11	45927416	+	76	1	70	1	60	0	177	29	126	6	151	20	454	0.121145	0.343929	7.64399e-08
genome	11	46619238	+	1139	1	900	1	1151	1	1683	80	1414	67	1669	94	4766	0.0505665	0.250248	3.28979e-50
genome	11	48692554	+	1162	4	1031	1	1140	1	1620	60	1391	37	1576	29	4587	0.0274689	0.0789343	2.65672e-23
genome	11	48692752	+	64	0	69	0	83	0	129	8	76	3	150	9	355	0.056338	0.495995	6.04246e-05
genome	11	48693096	+	94	3	63	3	91	3	198	29	100	16	177	21	475	0.138947	0.497293	3.88392e-06
genome	11	48693161	+	1746	2	1737	2	1739	1	2365	63	2549	50	2432	64	7346	0.0240947	0.0653326	4.68379e-35
genome	11	48693204	+	1452	0	1319	2	1383	2	1935	58	1663	44	1958	51	5556	0.0275378	0.304145	2.90565e-32
genome	11	48694328	+	60	1	28	0	42	0	120	9	120	16	128	17	368	0.11413	0.355011	2.04671e-05
genome	11	48694688	+	1586	0	1590	1	1606	2	2074	282	1786	238	2051	283	5911	0.135848	0.363616	7.60095e-212
genome	11	48695089	+	1691	1	1579	2	1609	2	2408	143	2416	153	2292	157	7116	0.0636594	0.195382	9.92931e-97
genome	11	48696376	+	1617	1	1290	0	1522	0	2190	54	1756	39	2191	45	6137	0.0224866	0.0821501	8.50837e-32
genome	11	48696391	+	1500	1	1135	0	1465	0	2046	69	1502	49	2033	70	5581	0.0336857	0.289166	2.25928e-44
genome	11	49341756	+	191	0	151	0	151	0	316	9	221	4	296	7	833	0.0240096	0.192679	8.40863e-05
genome	11	49341788	+	340	0	280	1	322	0	633	25	491	7	626	13	1750	0.0257143	0.0891485	5.33281e-08
genome	11	49341799	+	319	0	268	1	293	1	627	34	485	13	635	25	1747	0.0412135	0.153116	3.58252e-11
genome	11	49728718	+	69	0	56	0	67	0	127	9	95	8	123	9	345	0.0753623	0.203033	7.10364e-06
genome	11	50125779	+	47	0	34	0	34	0	82	4	54	6	63	12	199	0.110553	0.480354	2.79274e-05
genome	11	50270380	+	198	0	147	0	230	0	360	10	210	3	414	10	984	0.023374	0.0671122	2.29997e-05
genome	11	50273781	+	284	0	198	1	275	0	484	14	326	15	479	10	1289	0.030256	0.0769031	1.89157e-07
genome	11	50998153	+	18	0	12	0	10	0	40	9	18	7	37	9	95	0.263158	0.611573	5.09077e-05
genome	11	51510632	+	335	0	195	0	351	0	577	14	328	8	582	13	1487	0.0235373	0.0780534	7.27857e-08
genome	11	51510665	+	303	0	200	0	285	0	522	13	254	12	481	18	1257	0.0342084	0.107305	6.15392e-10
genome	11	51513345	+	315	0	251	0	287	1	542	19	371	9	538	13	1451	0.0282564	0.0939758	7.77309e-08
genome	11	51514174	+	430	0	391	0	466	0	802	51	625	31	751	26	2178	0.0495868	0.146721	6.06086e-23
genome	11	51989967	+	184	0	144	1	163	1	334	17	187	4	331	18	852	0.0457746	0.122053	1.78407e-06
genome	11	52013712	+	60	0	43	0	59	0	115	6	56	4	115	11	286	0.0734266	0.198411	6.12083e-05
genome	11	52122896	+	337	0	286	1	359	0	534	24	478	22	557	24	1569	0.0446144	0.144051	2.61952e-14
genome	11	52135840	+	297	0	220	0	263	0	522	8	286	17	489	17	1297	0.0323824	0.0925521	1.99969e-09
genome	11	52137085	+	421	1	322	0	390	1	610	31	488	32	624	40	1722	0.0598142	0.515202	6.59087e-21
genome	11	52137113	+	329	2	233	1	327	0	521	18	413	17	542	27	1476	0.0420054	0.178754	3.34479e-10
genome	11	52265749	+	449	0	295	0	432	0	694	24	396	12	655	28	1745	0.0366762	0.172924	2.98458e-15
genome	11	52267223	+	431	0	285	0	447	0	680	25	356	8	687	34	1723	0.0388857	0.275708	5.78034e-16
genome	11	52267236	+	407	2	271	0	400	1	651	82	376	37	672	55	1699	0.102413	0.299629	1.28878e-34
genome	11	52279710	+	530	0	362	0	460	0	792	23	565	9	759	30	2116	0.0293006	0.156383	3.49428e-14
genome	11	52280023	+	787	0	564	1	767	1	1231	67	1032	53	1170	56	3433	0.0512671	0.157846	7.95477e-35
genome	11	52280137	+	292	0	167	0	284	1	535	12	316	5	432	9	1283	0.020265	0.195701	6.73282e-05
genome	11	54761019	+	622	0	448	1	597	0	959	24	631	15	879	18	2469	0.0230863	0.147369	3.15919e-12
genome	11	55379922	+	441	0	350	1	383	0	790	23	558	13	729	20	2077	0.026962	0.122451	2.08678e-10
genome	11	55379979	+	434	0	338	0	389	1	746	57	526	36	621	41	1893	0.0707871	0.215981	1.2366e-27
genome	11	55382850	+	379	1	233	0	342	1	605	24	346	9	581	12	1532	0.0293734	0.099191	4.74907e-08
genome	11	55386217	+	345	0	326	1	352	2	550	55	423	34	565	48	1538	0.0890767	0.176247	1.24923e-27
genome	11	55386975	+	693	0	536	0	691	0	997	150	791	90	988	107	2776	0.125	0.617251	4.58933e-84
genome	11	55389421	+	502	1	416	0	451	0	775	20	571	14	752	24	2098	0.0276454	0.0839946	3.94209e-12
genome	11	55390505	+	395	0	292	0	362	0	666	20	442	18	618	23	1726	0.0353418	0.106106	1.74989e-13
genome	11	55390971	+	365	0	292	1	317	0	560	18	405	8	533	17	1498	0.0287049	0.136975	6.34254e-09
genome	11	55391493	+	298	1	277	2	324	0	586	17	454	8	548	16	1588	0.0258186	0.0730961	6.32936e-06
genome	11	55391498	+	298	0	269	0	323	0	569	23	446	17	541	29	1556	0.0443445	0.135862	1.58867e-14
genome	11	57339919	+	67	1	55	0	47	0	140	43	118	28	120	44	378	0.304233	0.754244	2.41875e-20
genome	11	57941994	+	134	0	82	0	101	0	196	20	103	8	197	22	496	0.100806	0.504168	6.72138e-12
genome	11	57948111	+	183	0	112	0	156	0	278	10	175	5	281	10	734	0.0340599	0.102985	5.37828e-06
genome	11	57949959	+	122	0	112	0	114	0	259	9	231	5	237	10	727	0.0330124	0.113336	7.39034e-05
genome	11	59622358	+	45	0	34	0	43	0	73	10	26	5	66	8	165	0.139394	0.924991	1.46444e-06
genome	11	59643559	+	123	0	81	0	118	0	194	7	113	7	202	6	509	0.0392927	0.111495	4.76643e-05
genome	11	59645853	+	78	0	50	0	68	0	125	12	67	10	111	9	303	0.10231	0.4667	1.01569e-07
genome	11	60429086	+	39	0	32	0	41	0	69	8	43	4	67	8	179	0.111732	0.303444	3.89599e-05
genome	11	60445245	+	71	0	42	0	55	0	137	11	61	3	117	7	315	0.0666667	0.204158	9.93487e-05
genome	11	60708082	+	121	0	99	0	146	0	237	10	197	6	238	11	672	0.0401786	0.122262	6.60513e-06
genome	11	62404281	+	50	0	19	0	24	0	39	22	22	8	34	23	95	0.557895	0.833107	7.33796e-21
genome	11	62493807	+	122	0	97	1	145	0	242	24	146	8	201	18	589	0.0848896	0.214587	3.2737e-10
genome	11	62493821	+	170	0	116	0	168	1	284	7	186	8	257	11	727	0.0357634	0.0931706	3.12832e-05
genome	11	64890251	+	103	0	55	0	92	0	158	11	121	11	147	8	426	0.0704225	0.214944	6.50777e-07
genome	11	68662790	+	88	0	86	0	104	0	172	10	111	6	153	4	436	0.0458716	0.142715	4.36775e-05
genome	11	68793108	+	892	0	718	0	845	0	1318	53	1034	36	1246	34	3598	0.0341857	0.116138	6.90282e-29
genome	11	68793238	+	1359	4	1022	0	1352	0	1799	66	1332	43	1780	42	4911	0.0307473	0.134493	2.71418e-32
genome	11	68794045	+	1033	0	725	0	940	0	1399	98	842	81	1371	124	3612	0.083887	0.234863	1.34189e-76
genome	11	68941950	+	167	0	96	0	143	0	238	12	166	3	240	4	644	0.0295031	0.0896337	8.33574e-05
genome	11	68941986	+	110	0	78	0	100	0	178	6	104	5	197	10	479	0.0438413	0.135583	4.29683e-05
genome	11	69287159	+	178	0	145	1	171	0	321	23	227	3	309	12	857	0.0443407	0.13585	3.46351e-07
genome	11	69464665	+	216	0	193	0	212	0	350	22	283	21	331	20	964	0.0653527	0.152134	1.09095e-14
genome	11	69464691	+	338	0	264	0	318	0	583	27	428	25	559	21	1570	0.0464968	0.123871	1.26644e-15
genome	11	69477764	+	333	0	251	0	321	1	577	28	420	17	557	22	1554	0.0431145	0.115317	6.82829e-13
genome	11	69478290	+	192	0	128	0	183	0	385	17	231	8	333	22	949	0.0495258	0.151731	1.38973e-09
genome	11	69479973	+	281	0	177	0	224	0	509	31	365	11	483	10	1357	0.0383198	0.1161	4.56508e-10
genome	11	69482401	+	476	0	338	0	430	0	796	22	523	7	760	16	2079	0.021645	0.0739598	5.70501e-10
genome	11	69729756	+	139	0	82	0	105	0	255	11	134	5	211	7	600	0.0383333	0.327227	3.97737e-05
genome	11	69794083	+	58	0	44	0	62	0	102	8	67	3	98	8	267	0.071161	0.220364	8.68306e-05
genome	11	69872368	+	110	0	78	0	85	0	194	9	123	3	175	12	492	0.0487805	0.150036	2.04174e-05
genome	11	70416751	+	488	0	356	0	415	0	715	27	535	24	705	26	1955	0.0393862	0.234494	1.3052e-17
genome	11	70540809	+	120	0	64	0	108	0	177	14	114	8	179	13	470	0.0744681	0.54776	2.72637e-08
genome	11	72332251	+	320	0	207	0	284	0	572	13	365	5	574	13	1511	0.0205162	0.162234	1.47321e-06
genome	11	72332507	+	389	0	192	1	332	0	596	35	323	17	528	19	1447	0.049067	0.279906	1.22275e-14
genome	11	72333658	+	235	1	186	0	233	0	500	30	309	16	400	18	1209	0.0529363	0.163035	1.27307e-11
genome	11	72334633	+	549	0	466	1	503	0	907	34	695	19	818	39	2420	0.0380165	0.115089	6.63569e-19
genome	11	72335712	+	535	0	382	0	489	0	821	21	584	20	796	24	2201	0.029532	0.802857	7.82097e-15
genome	11	72336996	+	448	0	355	2	386	0	704	17	481	14	658	22	1843	0.0287575	0.130058	6.45384e-10
genome	11	72337043	+	334	0	243	1	299	0	559	14	427	2	541	17	1527	0.021611	0.20926	3.68908e-06
genome	11	72338025	+	333	1	224	0	294	0	590	13	372	5	564	16	1526	0.0222805	0.0851837	3.33778e-06
genome	11	72338664	+	288	0	215	1	279	0	454	12	258	8	485	6	1197	0.021721	0.0681306	2.15296e-05
genome	11	72339068	+	341	1	253	0	331	1	573	23	366	25	542	24	1481	0.0486158	0.115022	1.50055e-13
genome	11	72339615	+	273	0	196	0	235	0	511	17	331	9	506	14	1348	0.0296736	0.0866555	4.10076e-08
genome	11	72340889	+	436	0	346	0	367	0	700	15	504	10	694	21	1898	0.024236	0.194255	2.838e-10
genome	11	72342252	+	222	0	137	0	212	0	374	26	199	19	322	33	895	0.0871508	0.411198	4.87866e-18
genome	11	74708106	+	62	0	38	0	47	0	104	9	54	6	98	13	256	0.109375	0.316608	1.71231e-06
genome	11	74799295	+	146	0	95	0	153	0	259	14	181	10	289	17	729	0.0562414	0.177906	1.34724e-08
genome	11	75378509	+	270	0	170	0	241	1	469	18	252	12	449	17	1170	0.0401709	0.126112	5.73529e-09
genome	11	75382413	+	225	0	154	1	196	0	342	14	230	3	316	15	888	0.036036	0.108449	1.27617e-06
genome	11	75383195	+	314	0	232	0	286	0	512	17	324	8	451	21	1287	0.035742	0.351898	7.9214e-11
genome	11	75385101	+	226	0	152	0	174	0	315	15	202	14	319	13	836	0.0502392	0.15463	3.71159e-10
genome	11	75385263	+	143	0	97	0	121	0	245	43	103	11	223	36	571	0.157618	0.593257	3.62888e-21
genome	11	75386607	+	221	1	150	0	207	0	420	12	250	7	362	10	1032	0.0281008	0.127287	2.51778e-05
genome	11	75387170	+	268	0	148	0	244	0	446	12	232	7	421	8	1099	0.0245678	0.108702	2.70412e-06
genome	11	75387181	+	272	0	165	0	249	0	454	8	251	7	420	10	1125	0.0222222	0.0677666	6.11589e-06
genome	11	75390648	+	272	0	155	0	240	0	453	16	215	7	394	13	1062	0.0338983	0.101206	1.89955e-08
genome	11	75391096	+	231	0	163	0	225	0	424	9	258	7	423	9	1105	0.0226244	0.177036	1.34205e-05
genome	11	75395955	+	260	0	202	0	231	0	420	17	281	7	413	14	1114	0.0341113	0.116945	8.13156e-09
genome	11	75396039	+	228	0	145	0	190	0	341	6	211	5	382	10	934	0.0224839	0.181925	4.57573e-05
genome	11	75399181	+	281	0	194	1	237	0	476	17	299	11	428	19	1203	0.039069	0.224279	4.35641e-09
genome	11	75489110	+	48	0	26	0	33	0	46	3	29	7	63	6	138	0.115942	0.333336	6.85677e-05
genome	11	75517198	+	82	0	97	0	90	0	157	7	154	4	183	10	494	0.0425101	0.129909	9.30335e-05
genome	11	75563741	+	56	0	45	0	62	0	121	14	76	2	97	7	294	0.0782313	0.43194	2.84935e-05
genome	11	75623769	+	525	1	436	0	545	0	825	26	576	18	829	36	2230	0.0358744	0.187239	2.23791e-17
genome	11	75655762	+	812	3	595	0	734	1	1218	31	875	22	1166	29	3259	0.0251611	0.207196	4.13256e-14
genome	11	75656155	+	739	0	652	2	719	1	1132	31	977	24	1082	20	3191	0.0235036	0.133689	1.09705e-13
genome	11	76492150	+	521	0	442	0	485	0	813	30	709	18	801	21	2323	0.029703	0.0867578	2.0453e-15
genome	11	76837262	+	130	0	91	1	114	0	248	6	172	12	239	10	659	0.0424886	0.129839	8.8271e-05
genome	11	76840883	+	121	1	74	1	120	0	194	29	123	16	209	31	526	0.144487	0.559956	1.88776e-14
genome	11	76857635	+	88	0	52	0	87	0	176	8	79	2	184	16	439	0.0592255	0.202116	1.51533e-05
genome	11	76877970	+	250	0	144	0	211	0	337	9	207	4	301	6	845	0.0224852	0.108775	3.21504e-05
genome	11	77184486	+	540	0	474	0	506	0	755	41	747	27	753	34	2255	0.0452328	0.138726	5.83619e-24
genome	11	77184723	+	1755	3	1538	2	1726	1	2294	174	2134	183	2194	188	6622	0.0823014	0.336284	4.06016e-127
genome	11	77184739	+	1871	1	1662	2	1827	0	2525	81	2397	78	2400	64	7322	0.0304562	0.137164	2.28012e-49
genome	11	77184836	+	742	1	505	1	697	0	1121	39	806	41	1106	31	3033	0.0365974	0.13376	6.19432e-22
genome	11	77184974	+	648	1	446	0	607	1	997	57	717	31	913	49	2627	0.0521507	0.513974	7.58009e-28
genome	11	77185108	+	873	0	577	0	835	0	1199	29	768	18	1321	33	3288	0.0243309	0.0677893	3.11933e-19
genome	11	77185495	+	1005	1	763	1	890	0	1432	36	1229	25	1426	25	4087	0.0210423	0.135561	8.58531e-17
genome	11	77186038	+	1113	1	904	1	1094	0	1635	58	1340	26	1619	42	4594	0.0274271	0.209138	3.49931e-26
genome	11	77186237	+	580	0	326	0	557	0	845	55	417	16	910	41	2172	0.0515654	0.136511	2.7381e-26
genome	11	77186744	+	927	4	700	1	819	0	1172	202	1009	122	1203	197	3384	0.15396	0.430668	6.49054e-122
genome	11	77186858	+	1003	0	731	0	973	0	1303	39	992	27	1351	47	3646	0.0309929	0.082369	2.64361e-28
genome	11	77186880	+	1240	3	885	1	1176	0	1597	86	1285	58	1586	83	4468	0.0508057	0.291502	1.02628e-49
genome	11	77186917	+	646	0	532	0	568	1	873	55	699	54	772	61	2344	0.0725256	0.388026	4.0131e-41
genome	11	77186943	+	149	0	137	1	142	0	262	48	217	22	262	45	741	0.155196	0.416119	2.35089e-23
genome	11	77530779	+	19	0	15	0	18	0	67	19	28	2	50	11	145	0.22069	0.493905	1.95488e-05
genome	11	77601466	+	114	0	89	0	86	0	203	15	150	7	180	12	533	0.0637899	0.195765	2.73271e-07
genome	11	77638552	+	174	0	108	0	175	0	330	9	186	6	299	8	815	0.0282209	0.0896534	3.1933e-05
genome	11	78071101	+	54	0	49	0	48	0	96	9	82	6	121	10	299	0.083612	0.315829	2.55998e-05
genome	11	78155344	+	149	0	103	0	120	0	269	13	186	5	233	8	688	0.0377907	0.101652	1.11134e-05
genome	11	78162770	+	89	0	47	0	69	0	126	21	77	9	129	16	332	0.138554	0.647598	6.83767e-11
genome	11	78162987	+	131	0	90	0	96	1	253	11	140	8	197	12	590	0.0525424	0.161814	1.49431e-05
genome	11	78163949	+	155	1	129	0	151	0	277	8	171	7	257	9	705	0.0340426	0.109213	8.70759e-05
genome	11	78164655	+	132	0	88	0	107	0	268	16	162	1	231	8	661	0.0378215	0.168942	3.71106e-05
genome	11	78164677	+	138	0	106	0	119	0	260	8	159	5	234	9	653	0.0336907	0.100499	5.25445e-05
genome	11	78165385	+	125	0	51	0	85	0	165	11	82	5	165	10	412	0.0631068	0.501914	2.09643e-06
genome	11	78167965	+	133	0	81	0	91	0	213	15	134	8	193	8	540	0.0574074	0.450677	6.79743e-07
genome	11	78168038	+	123	0	55	0	76	1	167	20	91	19	138	22	396	0.15404	0.378265	2.83581e-13
genome	11	78173914	+	121	1	90	1	122	0	203	16	124	5	187	10	514	0.0603113	0.481844	1.25504e-05
genome	11	78175580	+	108	0	71	0	108	1	219	30	73	14	177	30	469	0.157783	0.636487	1.33242e-15
genome	11	78177438	+	180	0	146	0	153	0	314	23	190	10	273	18	777	0.0656371	0.347431	1.20584e-11
genome	11	78180737	+	121	0	101	0	89	0	235	14	98	8	173	11	506	0.0652174	0.306016	9.01371e-08
genome	11	78195578	+	46	0	42	0	48	0	74	6	65	10	101	6	240	0.0916667	0.276137	3.56027e-05
genome	11	78413085	+	83	0	49	0	60	0	121	55	102	37	112	45	335	0.408955	0.85487	2.08964e-33
genome	11	79924398	+	165	0	97	0	172	0	302	8	177	17	308	7	787	0.0406607	0.132141	6.26341e-07
genome	11	79924470	+	271	0	206	0	254	0	439	10	355	11	450	18	1244	0.0313505	0.0950768	1.18437e-08
genome	11	80274198	+	393	2	298	0	408	0	591	35	436	22	640	45	1667	0.0611878	0.252058	9.74647e-21
genome	11	80282205	+	289	0	200	1	283	0	509	19	397	16	474	30	1380	0.0471014	0.12539	4.12181e-12
genome	11	80362635	+	200	0	111	0	197	2	333	31	197	17	318	20	848	0.0801887	0.356886	1.87936e-12
genome	11	83256513	+	95	0	62	0	79	0	161	24	94	21	136	15	391	0.153453	0.45777	7.71283e-14
genome	11	83293436	+	55	0	43	0	57	0	114	9	57	4	98	7	269	0.0743494	0.365373	8.53006e-05
genome	11	85002191	+	992	0	859	1	984	0	1479	114	1193	65	1430	104	4102	0.0689907	0.266114	5.23168e-65
genome	11	87938846	+	487	1	352	0	456	1	795	24	520	13	775	12	2090	0.023445	0.0731836	9.01315e-09
genome	11	87940706	+	586	0	368	1	552	0	827	30	537	18	875	41	2239	0.0397499	0.120846	2.40688e-19
genome	11	88100933	+	70	0	41	0	67	0	103	10	54	4	110	8	267	0.082397	0.240241	9.1673e-06
genome	11	88890332	+	134	0	100	0	119	0	237	9	150	3	243	9	630	0.0333333	0.0900188	7.75528e-05
genome	11	88890800	+	61	0	60	0	42	0	111	8	71	4	86	9	268	0.0783582	0.279751	3.40816e-05
genome	11	88908540	+	198	0	133	0	180	0	352	10	243	5	336	12	931	0.0290011	0.0967432	6.46598e-06
genome	11	88910918	+	57	0	38	0	55	0	122	14	66	17	90	22	278	0.190647	0.480743	1.67643e-11
genome	11	94534134	+	195	0	131	0	150	0	305	17	181	8	286	12	772	0.0479275	0.147335	1.36535e-08
genome	11	94534204	+	540	0	404	0	529	1	871	18	741	18	868	23	2480	0.0237903	0.0753532	2.03499e-11
genome	11	94534270	+	227	1	162	0	225	0	462	15	359	6	461	17	1282	0.0296412	0.0802475	3.94152e-06
genome	11	94535976	+	285	0	228	0	254	0	477	11	297	6	482	15	1256	0.0254777	0.116086	2.04118e-07
genome	11	95275799	+	116	0	78	0	91	0	203	13	161	6	204	9	568	0.0492958	0.151663	9.03517e-06
genome	11	95562217	+	555	0	501	0	514	0	860	36	734	25	823	27	2417	0.0364088	0.142457	3.93781e-20
genome	11	95566410	+	452	0	312	0	454	0	725	18	450	9	745	17	1920	0.0229167	0.103597	3.37632e-10
genome	11	95566441	+	331	1	243	0	333	0	587	10	368	5	593	19	1548	0.0219638	0.0763603	1.86009e-06
genome	11	95571181	+	83	0	47	0	49	0	135	9	108	9	116	10	359	0.0779944	0.84575	8.35197e-06
genome	11	95971981	+	53	0	79	3	45	0	28	17	31	19	21	11	80	0.5875	0.996227	4.68569e-26
genome	11	95972010	+	39	0	65	1	37	0	28	15	29	11	16	7	73	0.452055	0.731043	2.4658e-17
genome	11	96139595	+	168	0	158	0	142	0	261	13	259	9	242	9	762	0.0406824	0.853346	2.82146e-07
genome	11	96139762	+	341	1	283	0	325	3	494	10	459	13	521	11	1474	0.0230665	0.0551405	8.63888e-05
genome	11	96140026	+	384	0	179	0	380	0	556	34	229	16	586	26	1371	0.055434	0.444935	2.20899e-18
genome	11	96680109	+	300	2	210	0	292	0	538	18	410	7	487	11	1435	0.0250871	0.120668	1.00002e-05
genome	11	96680153	+	229	0	178	2	236	0	455	22	321	11	436	14	1212	0.0387789	0.104207	2.39916e-07
genome	11	96680155	+	236	0	179	0	230	0	457	16	321	5	435	11	1213	0.0263809	0.107368	1.02692e-06
genome	11	96698746	+	131	0	95	0	110	0	280	15	127	2	246	9	653	0.0398162	0.40494	1.72814e-05
genome	11	96928147	+	465	0	365	0	455	0	726	30	508	15	655	23	1889	0.0359979	0.217854	2.8731e-16
genome	11	96932464	+	83	0	42	0	71	0	165	12	108	8	143	9	416	0.0697115	0.222542	9.92488e-06
genome	11	96939181	+	144	0	84	0	107	0	243	15	159	1	200	10	602	0.0431894	0.13212	8.28814e-06
genome	11	97217661	+	273	1	211	0	270	0	389	14	293	8	415	15	1097	0.0337284	0.127281	4.99531e-08
genome	11	97573418	+	112	0	87	0	103	0	234	8	142	7	206	8	582	0.0395189	0.120082	5.74007e-05
genome	11	97573689	+	86	0	44	1	69	1	148	14	79	10	139	7	366	0.0846995	0.318961	7.24987e-05
genome	11	97573820	+	169	0	124	0	138	0	266	12	245	12	272	6	783	0.0383142	0.143238	1.5806e-06
genome	11	97574728	+	76	0	49	0	57	0	127	10	80	4	95	7	302	0.0695364	0.212416	3.80607e-05
genome	11	97602072	+	509	1	421	0	473	1	744	23	616	15	750	25	2110	0.0298578	0.171944	2.7868e-12
genome	11	97604275	+	459	2	355	1	463	1	809	39	624	27	769	28	2202	0.0426885	0.13049	7.90605e-15
genome	11	97659195	+	433	2	283	0	386	0	686	11	406	11	651	19	1743	0.0235227	0.0703302	2.35422e-07
genome	11	97687951	+	13	0	10	0	9	0	32	11	14	7	28	13	74	0.418919	0.755534	1.18502e-06
genome	11	97727253	+	242	0	147	0	211	1	385	19	287	9	357	16	1029	0.04276	0.114414	2.08024e-08
genome	11	97728091	+	295	0	207	0	260	0	468	16	313	2	449	15	1230	0.0268293	0.258159	1.04225e-07
genome	11	97728132	+	196	0	166	1	182	0	316	13	247	8	333	11	896	0.0357143	0.330006	2.75165e-06
genome	11	97728163	+	207	0	173	0	179	0	353	22	268	10	367	17	988	0.0495951	0.152606	1.84547e-10
genome	11	97728191	+	162	1	151	0	163	0	301	7	227	8	291	10	819	0.030525	0.102928	9.58721e-05
genome	11	97729530	+	188	0	124	0	158	0	273	8	196	6	270	6	739	0.0270636	0.0776361	4.78994e-05
genome	11	97920246	+	1576	1	1309	1	1701	0	1991	79	1569	46	2230	85	5790	0.0362694	0.189038	5.22185e-51
genome	11	98141554	+	63	0	35	0	72	0	138	8	80	3	125	12	343	0.0670554	0.205283	7.39381e-05
genome	11	98581411	+	244	0	204	0	237	0	427	15	288	7	402	14	1117	0.0322292	0.142785	2.67917e-08
genome	11	98584632	+	197	0	159	0	170	0	372	9	264	7	316	10	952	0.0273109	0.0506079	9.53835e-06
genome	11	98586419	+	279	0	206	1	288	0	476	21	283	7	517	23	1276	0.0399687	0.360189	4.56104e-10
genome	11	98586475	+	235	0	183	0	242	0	442	10	296	8	386	9	1124	0.0240214	0.160065	3.40568e-06
genome	11	99823266	+	609	1	385	0	615	0	904	28	569	27	951	27	2424	0.0338284	0.338512	1.46186e-17
genome	11	100212599	+	286	0	244	0	283	0	528	23	348	19	536	31	1412	0.0516997	0.18754	1.90089e-15
genome	11	101213724	+	164	0	100	0	147	0	264	3	158	9	234	7	656	0.0289634	0.264657	8.74518e-05
genome	11	101333337	+	284	0	198	1	302	0	492	10	354	8	523	12	1369	0.0219138	0.0973382	1.35504e-05
genome	11	101333361	+	320	0	241	0	326	1	542	16	420	9	544	16	1506	0.0272244	0.123569	7.61566e-08
genome	11	101333369	+	282	1	227	0	294	0	496	26	381	11	492	24	1369	0.0445581	0.118979	8.63205e-12
genome	11	101526779	+	50	0	30	0	31	1	91	10	60	7	88	12	239	0.121339	0.317559	9.70825e-05
genome	11	102327170	+	183	0	152	0	168	0	290	10	210	2	277	10	777	0.028314	0.167379	1.51057e-05
genome	11	102956854	+	167	0	99	0	145	0	250	7	155	9	223	10	628	0.0414013	0.169889	1.67517e-06
genome	11	103007301	+	130	0	112	0	123	1	202	12	145	6	247	11	594	0.0488215	0.150166	8.78726e-06
genome	11	103007326	+	133	0	127	0	117	0	240	19	185	5	254	14	679	0.0559647	0.172341	3.51776e-08
genome	11	106125724	+	86	0	63	0	68	0	142	19	88	7	117	13	347	0.112392	0.702462	2.47313e-09
genome	11	106132437	+	136	0	92	0	139	0	225	11	132	3	213	6	570	0.0350877	0.177051	4.2164e-05
genome	11	106152828	+	258	0	200	0	248	0	414	21	358	18	402	25	1174	0.0545145	0.167902	4.2083e-14
genome	11	106153017	+	329	0	293	0	321	0	569	15	423	12	565	11	1557	0.0244059	0.0814373	1.28915e-08
genome	11	106153051	+	395	0	316	0	369	0	631	27	476	16	669	25	1776	0.0382883	0.115995	5.69484e-15
genome	11	106153449	+	262	0	169	1	264	1	431	18	214	4	406	9	1051	0.0294957	0.161561	1.16442e-05
genome	11	106392015	+	83	0	43	0	71	0	158	9	93	7	146	8	397	0.0604534	0.158168	4.97208e-05
genome	11	107370418	+	282	0	265	0	304	0	504	11	326	4	518	19	1348	0.0252226	0.136318	5.04549e-08
genome	11	107370473	+	200	0	147	0	196	0	404	12	230	4	384	11	1018	0.0265226	0.0806363	8.59932e-06
genome	11	107376537	+	355	0	312	0	335	0	534	24	468	21	558	28	1560	0.0467949	0.12462	9.51351e-17
genome	11	107379817	+	301	0	223	0	261	0	492	11	336	12	522	11	1350	0.0251852	0.136131	1.46067e-07
genome	11	107384231	+	259	0	213	1	245	0	504	22	382	9	459	11	1345	0.0312268	0.092042	2.03929e-07
genome	11	107388414	+	228	0	127	0	165	0	356	19	157	3	312	16	825	0.0460606	0.161546	6.12532e-09
genome	11	107388563	+	191	1	132	0	166	0	356	21	190	10	337	16	883	0.0532276	0.163936	1.18275e-08
genome	11	108607474	+	102	0	62	0	87	0	112	27	67	11	122	23	301	0.202658	0.451382	3.91008e-18
genome	11	109544760	+	132	0	85	0	131	0	191	6	131	11	177	6	499	0.0460922	0.178763	4.19086e-06
genome	11	109556695	+	173	0	111	0	143	0	288	23	223	14	279	24	790	0.0772152	0.263639	1.52735e-12
genome	11	114563125	+	1002	1	815	1	941	0	1454	47	1291	19	1543	34	4288	0.0233209	0.0632287	1.42913e-19
genome	11	115474204	+	221	0	191	0	230	0	419	12	234	10	408	17	1061	0.0367578	0.131723	7.39418e-09
genome	11	115474593	+	178	0	130	0	168	0	333	10	196	3	288	12	817	0.0305998	0.0983957	9.03452e-06
genome	11	115498050	+	107	0	93	0	90	0	191	9	162	3	206	10	559	0.039356	0.105695	8.79939e-05
genome	11	115735761	+	128	0	93	0	115	0	229	13	157	5	192	10	578	0.0484429	0.225165	2.09069e-06
genome	11	115737795	+	97	0	62	0	76	0	173	27	90	12	168	26	431	0.150812	0.407371	8.10096e-14
genome	11	115741656	+	154	0	119	0	168	0	298	13	245	11	305	11	848	0.0412736	0.125864	3.37554e-07
genome	11	115746348	+	123	0	94	1	102	0	203	18	126	15	187	20	516	0.102713	0.272529	6.40482e-11
genome	11	116328898	+	258	0	234	0	233	1	480	22	402	17	473	18	1355	0.0420664	0.112646	3.46258e-10
genome	11	116967692	+	58	0	57	0	68	0	146	12	90	7	133	9	369	0.0758808	0.342823	8.88253e-06
genome	11	117039377	+	94	1	61	0	79	0	165	12	99	11	136	14	400	0.0925	0.251184	3.22399e-07
genome	11	117746083	+	126	0	85	0	131	0	237	16	113	11	237	26	587	0.0902896	0.245714	1.09225e-11
genome	11	117746376	+	335	1	268	0	306	0	521	11	349	8	548	14	1418	0.0232722	0.0892847	9.67309e-07
genome	11	120379292	+	268	0	199	0	264	0	391	13	273	4	430	11	1094	0.0255941	0.0779769	5.20237e-07
genome	11	120379344	+	130	0	122	0	141	0	264	25	181	33	279	29	724	0.120166	0.316983	5.90253e-18
genome	11	120654166	+	607	0	482	0	527	0	1022	41	858	20	925	28	2805	0.0317291	0.0937747	1.54593e-18
genome	11	120654416	+	883	2	732	0	821	0	1396	45	1261	25	1310	35	3967	0.0264684	0.120342	7.56935e-20
genome	11	120654844	+	604	0	527	0	577	1	908	24	855	18	904	21	2667	0.023622	0.0640482	5.57576e-13
genome	11	120654954	+	749	4	581	3	687	2	1172	33	937	11	1078	23	3187	0.0210229	0.0731126	1.60493e-07
genome	11	120677154	+	126	0	112	0	121	0	281	8	165	6	261	12	707	0.0367751	0.698427	1.97064e-05
genome	11	120677221	+	192	0	141	0	172	1	342	11	224	3	388	15	954	0.0303983	0.0891743	4.31586e-05
genome	11	121390873	+	64	0	40	0	54	0	100	20	52	10	73	9	225	0.173333	0.449026	2.19091e-10
genome	11	121500196	+	41	0	31	0	39	1	68	8	48	9	82	10	198	0.136364	0.259376	3.53107e-05
genome	12	4832608	+	1398	1	1304	0	1364	0	1955	80	1992	64	1934	92	5881	0.0401292	0.122099	1.90125e-53
genome	12	4832890	+	1269	0	1187	3	1197	2	1817	49	1731	26	1638	45	5186	0.0231392	0.224166	2.93168e-22
genome	12	4832973	+	1441	0	1384	2	1463	3	2027	53	2111	43	2059	56	6197	0.024528	0.0665081	8.59368e-29
genome	12	4833377	+	429	1	341	0	421	0	680	37	542	29	640	38	1862	0.0558539	0.170841	6.27186e-22
genome	12	8972113	+	314	0	236	0	282	0	475	15	326	7	494	13	1295	0.027027	0.0606684	2.38998e-08
genome	12	8988317	+	193	0	105	0	167	0	261	8	149	9	291	4	701	0.0299572	0.208589	2.02628e-05
genome	12	12073226	+	587	1	467	1	523	2	863	16	691	10	803	24	2357	0.0212134	0.127067	5.87827e-08
genome	12	12073235	+	771	1	638	1	695	0	1154	69	938	55	1071	55	3163	0.0565918	0.312132	8.10055e-38
genome	12	12073343	+	861	1	686	3	896	0	1288	41	1070	36	1297	47	3655	0.0339261	0.107092	3.62676e-23
genome	12	12073634	+	252	0	200	0	229	0	418	12	299	5	390	11	1107	0.0252936	0.115291	1.29596e-06
genome	12	12440485	+	4	0	8	1	4	0	20	17	10	4	14	11	44	0.727273	0.954139	3.92161e-06
genome	12	12962028	+	470	0	401	0	448	0	738	27	658	14	722	17	2118	0.0273843	0.0786362	4.71283e-13
genome	12	17283946	+	1282	0	1103	1	1199	0	1526	315	1451	280	1558	283	4535	0.193605	0.79255	2.76134e-238
genome	12	17327294	+	264	0	187	0	235	0	385	8	241	2	432	12	1058	0.020794	0.0633976	1.53799e-05
genome	12	17329655	+	503	0	383	0	446	1	755	18	597	13	766	19	2118	0.0236072	0.0870931	4.17586e-10
genome	12	17330425	+	227	0	147	0	184	0	400	7	208	7	351	11	959	0.0260688	0.0739844	9.3357e-06
genome	12	17334099	+	261	0	223	1	246	0	469	17	336	9	475	10	1280	0.028125	0.12405	1.05052e-06
genome	12	17334205	+	386	0	257	1	355	1	645	25	435	10	609	24	1689	0.0349319	0.131509	2.40795e-10
genome	12	17334294	+	289	0	175	0	255	0	506	16	249	6	472	13	1227	0.0285249	0.46709	8.1384e-08
genome	12	17419488	+	83	0	53	0	65	0	143	14	72	2	128	6	343	0.0641399	0.302129	3.02967e-05
genome	12	17597791	+	617	1	491	0	595	1	982	44	668	25	974	47	2624	0.0442073	0.378614	2.63388e-23
genome	12	17598089	+	481	0	300	0	433	0	723	123	384	70	676	122	1783	0.176669	0.854512	3.65892e-77
genome	12	17598315	+	619	0	436	0	552	0	913	104	596	68	877	102	2386	0.114837	0.332351	6.39712e-65
genome	12	17598587	+	831	1	732	2	843	0	1177	43	1005	38	1192	47	3374	0.0379372	0.134066	1.24663e-26
genome	12	17598820	+	603	0	416	1	526	0	881	35	626	16	842	27	2349	0.0332056	0.117233	1.46789e-16
genome	12	17599448	+	551	0	472	0	538	0	928	35	637	10	886	27	2451	0.0293758	0.0856176	2.58051e-16
genome	12	17599581	+	495	0	351	0	440	0	803	38	483	23	779	46	2065	0.051816	0.159557	1.0763e-23
genome	12	18414627	+	104	0	64	0	90	0	217	8	108	7	203	9	528	0.0454545	0.127984	5.97935e-05
genome	12	21364732	+	108	0	89	0	96	1	191	15	115	6	184	16	490	0.0755102	0.229254	2.68575e-07
genome	12	24759359	+	346	0	283	0	294	1	558	31	397	17	489	28	1444	0.0526316	0.162091	6.98311e-16
genome	12	24760367	+	227	0	147	0	187	0	397	12	226	7	353	3	976	0.022541	0.188443	4.19852e-05
genome	12	24762677	+	390	2	343	0	358	0	679	36	505	27	662	28	1846	0.0492958	0.167283	1.24022e-16
genome	12	24762864	+	336	1	244	1	324	1	587	10	347	5	566	18	1500	0.022	0.0848121	6.95042e-05
genome	12	24762867	+	354	1	266	1	346	0	605	23	367	15	592	32	1564	0.044757	0.160774	5.37127e-13
genome	12	28725352	+	107	0	64	0	86	0	252	18	121	7	198	14	571	0.0683012	0.316966	3.34002e-07
genome	12	31069748	+	130	0	126	0	125	0	195	8	195	7	199	6	589	0.0356537	0.105569	2.44476e-05
genome	12	31069782	+	895	0	852	0	885	1	1360	57	1300	50	1296	60	3956	0.0422144	0.128944	1.69708e-36
genome	12	31069830	+	1223	2	1130	0	1185	0	1784	57	1762	27	1797	44	5343	0.0239566	0.0649574	4.29875e-26
genome	12	31070201	+	198	1	208	0	209	0	386	23	328	18	395	19	1109	0.0541028	0.312856	4.11055e-11
genome	12	32883088	+	34	0	19	0	38	0	79	15	33	4	75	8	187	0.144385	0.684374	1.14945e-05
genome	12	47859818	+	1586	2	1508	2	1504	1	2048	47	1913	35	2018	40	5979	0.0204047	0.174153	1.52991e-24
genome	12	51025831	+	200	0	160	0	153	0	332	10	240	6	315	8	887	0.0270575	0.213464	1.55901e-05
genome	12	51025863	+	361	0	314	1	338	1	699	22	567	7	686	20	1952	0.0251025	0.0870793	1.7106e-07
genome	12	51025874	+	372	0	315	0	328	0	768	38	632	20	769	33	2169	0.0419548	0.155615	3.6426e-16
genome	12	54669644	+	107	3	71	2	112	1	173	15	143	16	197	21	513	0.101365	0.420085	4.46425e-06
genome	12	54763818	+	115	0	82	0	112	0	211	11	115	2	196	8	522	0.0402299	0.122431	4.93257e-05
genome	12	55445726	+	214	0	149	0	186	2	352	45	196	27	324	40	872	0.12844	0.737045	1.06241e-22
genome	12	55465077	+	349	0	245	1	302	0	546	17	366	12	524	10	1436	0.0271588	0.156546	8.1435e-08
genome	12	59060291	+	65	0	47	0	55	0	105	12	62	5	131	7	298	0.0805369	0.226736	1.6267e-05
genome	12	59127954	+	1178	0	984	0	1138	1	1630	54	1352	37	1743	58	4725	0.0315344	0.167068	1.26485e-33
genome	12	59128122	+	849	0	708	0	840	0	1052	39	833	35	1103	34	2988	0.0361446	0.109009	9.81979e-29
genome	12	59128152	+	243	0	209	0	242	0	309	12	220	5	326	8	855	0.0292398	0.16385	3.00999e-07
genome	12	59128650	+	41	0	30	0	39	0	52	11	27	6	43	7	122	0.196721	0.490886	6.07442e-08
genome	12	59309847	+	24	0	20	0	21	0	49	11	29	8	41	8	119	0.226891	0.903712	2.35906e-06
genome	12	68610105	+	230	0	186	0	208	0	325	10	270	9	318	9	913	0.0306681	0.162949	3.90953e-07
genome	12	69231777	+	63	0	41	0	55	0	115	14	67	7	129	17	311	0.122186	0.410945	6.746e-08
genome	12	69419508	+	259	0	203	0	253	0	511	14	338	9	521	11	1370	0.0248175	0.256766	5.45847e-07
genome	12	69420027	+	174	0	120	0	147	0	331	14	207	9	281	14	819	0.045177	0.129615	8.9345e-08
genome	12	69420299	+	265	0	200	0	218	0	423	9	312	5	416	11	1151	0.0217202	0.0583757	7.9296e-06
genome	12	71031280	+	475	0	361	0	506	1	716	109	513	66	747	85	1976	0.131579	0.384101	2.07639e-60
genome	12	72808195	+	80	0	39	0	44	0	156	12	76	5	160	10	392	0.0688776	0.190502	6.36813e-05
genome	12	72831225	+	107	0	116	0	132	0	215	9	147	2	208	8	570	0.0333333	0.0992789	8.99569e-05
genome	12	72834000	+	32	0	14	0	16	0	35	10	16	3	26	8	77	0.272727	0.70436	9.94789e-07
genome	12	76274465	+	198	0	160	0	153	0	331	10	238	6	315	8	884	0.0271493	0.214076	1.56557e-05
genome	12	76274497	+	361	0	314	1	338	1	699	22	566	7	686	20	1951	0.0251153	0.0871228	1.69678e-07
genome	12	76274508	+	372	0	315	0	328	0	768	38	632	20	769	33	2169	0.0419548	0.155615	3.6426e-16
genome	12	76337799	+	255	0	176	0	234	0	463	15	280	8	458	12	1201	0.0291424	0.138931	1.67568e-07
genome	12	76340988	+	283	1	230	0	267	0	501	25	361	17	461	18	1323	0.0453515	0.228762	1.20462e-11
genome	12	76348072	+	179	0	119	0	151	0	308	15	242	3	292	9	842	0.0320665	0.473421	8.40116e-06
genome	12	78397924	+	13	0	31	2	10	0	16	3	11	6	15	9	42	0.428571	0.953441	2.45524e-06
genome	12	78397939	+	9	0	24	0	9	0	12	5	12	6	15	7	39	0.461538	0.794709	1.36542e-07
genome	12	80994993	+	193	1	143	0	162	0	299	8	219	4	288	12	806	0.0297767	0.101824	8.75165e-05
genome	12	80996515	+	366	0	264	0	308	0	602	15	350	4	610	15	1562	0.021767	0.0891476	9.90792e-08
genome	12	80996618	+	372	2	267	0	362	0	591	18	377	9	600	16	1568	0.0274235	0.0834559	7.99028e-08
genome	12	83698188	+	86	0	49	0	94	0	156	13	50	2	160	13	366	0.0765027	0.161739	8.14784e-07
genome	12	83721302	+	191	0	145	0	151	0	350	9	285	8	315	14	950	0.0326316	0.0881711	2.26424e-06
genome	12	83729335	+	84	0	44	0	71	1	116	37	74	27	115	37	305	0.331148	0.637272	1.60348e-24
genome	12	83806123	+	715	1	574	0	670	1	950	21	802	24	1014	18	2766	0.0227766	0.057914	6.37207e-13
genome	12	85026213	+	172	0	105	0	184	0	311	10	184	5	283	10	778	0.0321337	0.396526	7.66146e-06
genome	12	85179963	+	124	0	92	0	99	0	220	10	127	10	208	12	555	0.0576577	0.29591	4.05243e-07
genome	12	85180263	+	112	0	60	0	82	0	148	5	77	3	146	10	371	0.0485175	0.27716	7.05058e-05
genome	12	85180504	+	85	0	46	0	81	0	113	8	65	7	164	17	342	0.0935673	0.257805	1.10357e-07
genome	12	85266398	+	121	0	97	0	92	0	171	12	88	4	207	13	466	0.0622318	0.255557	2.63585e-07
genome	12	86517263	+	272	0	210	0	238	0	535	14	371	12	474	18	1380	0.0318841	0.086198	7.46698e-09
genome	12	86553181	+	349	0	274	1	326	0	611	18	388	4	589	17	1588	0.0245592	0.0719652	1.53801e-07
genome	12	86561058	+	275	0	224	0	267	0	499	10	351	6	444	12	1294	0.0216383	0.209532	1.98679e-06
genome	12	86561145	+	331	2	255	1	276	0	529	15	374	13	502	6	1405	0.0241993	0.0766355	3.78969e-05
genome	12	86565634	+	350	0	255	0	282	0	667	14	455	13	585	15	1707	0.0246046	0.0779039	1.95498e-08
genome	12	86565927	+	440	0	330	1	381	0	710	29	521	24	654	38	1885	0.0482759	0.14844	2.28928e-18
genome	12	86567066	+	513	0	465	0	538	0	907	21	780	14	830	19	2517	0.0214541	0.0574087	7.0774e-12
genome	12	86567134	+	411	0	320	1	358	1	665	21	590	13	656	27	1911	0.0319205	0.0944338	2.24277e-10
genome	12	86567218	+	241	0	167	0	194	0	422	7	275	5	376	14	1073	0.0242311	0.102876	8.38122e-06
genome	12	86567774	+	148	0	122	1	150	0	330	11	207	11	307	7	844	0.0343602	0.319868	7.55858e-05
genome	12	86568008	+	301	1	217	0	291	0	566	29	365	11	540	24	1471	0.0435078	0.122815	9.76811e-12
genome	12	86762672	+	62	0	81	1	76	0	155	28	150	19	164	27	469	0.157783	0.707607	1.77408e-12
genome	12	87114334	+	168	0	110	0	171	0	246	31	182	24	278	34	706	0.126062	0.453108	9.31116e-21
genome	12	87313570	+	277	0	182	0	258	0	511	9	292	4	475	13	1278	0.0203443	0.0659403	8.53405e-06
genome	12	87317125	+	232	0	167	0	207	2	291	34	189	27	311	38	791	0.125158	0.330903	2.28907e-23
genome	12	87320222	+	139	0	87	0	126	0	247	12	156	2	218	9	621	0.037037	0.155448	2.81324e-05
genome	12	87320491	+	267	2	223	0	281	0	454	57	328	43	468	53	1250	0.1224	0.642572	5.50121e-31
genome	12	88033615	+	21	0	16	1	21	1	69	22	37	5	61	21	167	0.287425	0.869574	1.06183e-05
genome	12	88033623	+	149	0	127	0	160	1	274	29	172	17	267	24	713	0.0981767	0.266688	2.34987e-14
genome	12	88033657	+	340	0	334	0	342	0	576	23	442	27	616	28	1634	0.0477356	0.146726	2.02495e-17
genome	12	99013652	+	589	1	466	3	571	2	946	39	789	32	897	33	2632	0.0395137	0.116505	7.10607e-16
genome	12	99013773	+	319	0	204	0	314	0	536	11	299	6	463	15	1298	0.0246533	0.111127	1.04265e-07
genome	12	100172697	+	197	0	115	0	184	0	295	12	149	5	273	3	717	0.027894	0.176673	2.42895e-05
genome	12	100173379	+	264	0	157	0	246	1	419	4	229	13	386	8	1034	0.0241779	0.228685	3.84367e-05
genome	12	100173429	+	361	0	267	0	394	0	545	14	359	8	571	16	1475	0.0257627	0.146118	1.68389e-09
genome	12	100173463	+	362	0	264	0	328	1	510	10	341	8	504	12	1355	0.0221402	0.0635602	1.34705e-06
genome	12	102742416	+	122	0	106	0	106	0	221	7	189	4	216	11	626	0.0351438	0.094765	7.20831e-05
genome	12	102742708	+	177	0	128	0	177	0	316	13	201	4	288	6	805	0.0285714	0.0901991	1.82428e-05
genome	12	102743507	+	134	0	85	0	147	0	273	20	199	8	292	14	764	0.0549738	0.172455	4.97872e-08
genome	12	105006592	+	130	0	82	0	120	0	264	14	160	2	241	9	665	0.037594	0.118472	3.43995e-05
genome	12	105006999	+	200	0	123	0	176	0	317	20	195	7	357	17	869	0.0506329	0.161788	1.41831e-09
genome	12	105804124	+	140	0	92	0	118	0	238	12	150	7	231	10	619	0.0468498	0.131666	1.77864e-06
genome	12	106002859	+	98	0	50	0	87	0	157	7	99	5	167	9	423	0.0496454	0.222772	7.78563e-05
genome	12	108780213	+	15	0	9	0	6	0	16	14	10	8	13	12	39	0.871795	0.993318	1.02643e-14
genome	12	109506919	+	54	0	49	0	55	0	115	8	83	4	100	10	298	0.0738255	0.224553	6.51666e-05
genome	12	109512416	+	148	0	116	0	119	0	277	14	202	2	228	15	707	0.0438472	0.134254	1.17211e-06
genome	12	109512530	+	140	0	109	0	122	0	260	14	191	13	248	9	699	0.0515021	0.158579	1.59853e-07
genome	12	109513570	+	118	0	84	0	116	0	211	7	154	4	203	12	568	0.040493	0.383166	3.07654e-05
genome	12	109514646	+	98	0	66	0	66	0	131	15	73	12	164	26	368	0.144022	0.471376	1.40141e-12
genome	12	109616767	+	118	0	80	0	85	0	194	9	163	11	183	5	540	0.0462963	0.142138	2.18647e-05
genome	12	109617480	+	243	0	168	2	259	0	416	23	270	7	409	24	1095	0.0493151	0.164259	9.55348e-10
genome	12	109620762	+	263	0	175	0	212	0	434	13	274	6	409	7	1117	0.0232766	0.0771969	5.94516e-06
genome	12	109620776	+	280	0	188	0	226	0	452	21	292	6	451	14	1195	0.0343096	0.102606	5.43282e-09
genome	12	110488999	+	247	1	209	1	242	0	457	15	318	9	419	10	1194	0.0284757	0.108482	1.3066e-05
genome	12	110537251	+	227	0	152	0	194	0	404	9	231	3	414	14	1049	0.0247855	0.063058	1.07316e-05
genome	12	110607076	+	83	0	78	0	68	0	181	8	126	11	150	8	457	0.059081	0.387417	1.32408e-05
genome	12	110622769	+	100	0	79	0	89	0	200	45	100	22	198	41	498	0.216867	0.81776	6.2876e-23
genome	12	110623578	+	167	0	117	0	144	0	285	13	171	4	290	9	746	0.0348525	0.323586	6.44983e-06
genome	12	110623600	+	162	0	123	0	165	0	301	14	194	7	293	23	788	0.0558376	0.171954	1.486e-09
genome	12	110632492	+	132	0	100	1	127	0	221	9	135	8	224	11	580	0.0482759	0.206727	1.29031e-05
genome	12	110864598	+	775	1	654	0	730	1	1131	37	970	22	1149	38	3250	0.0298462	0.0872561	1.6019e-19
genome	12	110864609	+	708	0	568	1	668	1	1075	31	877	11	1072	32	3024	0.0244709	0.236749	3.64893e-14
genome	12	110864948	+	209	1	159	0	209	0	301	48	232	28	343	64	876	0.159817	0.526601	8.57082e-32
genome	12	111512246	+	130	0	95	0	131	0	268	11	132	7	233	4	633	0.0347551	0.104915	4.76905e-05
genome	12	113100580	+	165	0	98	0	126	0	277	15	223	25	258	16	758	0.0738786	0.538328	4.11114e-11
genome	12	119226127	+	99	0	78	0	78	0	173	14	91	4	179	9	443	0.0609481	0.187361	3.45809e-06
genome	12	119840427	+	125	0	114	0	121	1	282	121	240	109	287	127	809	0.441286	0.832492	8.74013e-70
genome	13	3348941	+	974	0	867	0	963	0	1447	114	1353	144	1389	115	4189	0.0890427	0.311671	9.09829e-87
genome	13	3348966	+	1008	3	909	1	981	2	1487	84	1477	114	1476	93	4440	0.0655405	0.216998	2.94572e-56
genome	13	3349376	+	553	0	350	1	568	0	795	183	537	129	841	205	2173	0.23792	0.653238	8.98905e-127
genome	13	3607028	+	327	0	189	0	259	0	498	24	299	12	473	15	1270	0.0401575	0.0944041	1.90439e-11
genome	13	3611871	+	312	1	206	0	258	0	533	24	266	13	507	14	1306	0.0390505	0.201528	6.61634e-10
genome	13	3611913	+	313	0	171	0	258	0	515	16	189	2	495	17	1199	0.029191	0.139146	3.92725e-08
genome	13	3614565	+	194	0	114	0	154	0	365	8	204	7	319	7	888	0.0247748	0.0839331	9.0898e-05
genome	13	3615097	+	272	0	189	0	283	0	482	12	242	9	494	12	1218	0.0270936	0.080898	1.2441e-07
genome	13	4664496	+	60	0	45	0	60	0	133	14	70	7	121	9	324	0.0925926	0.45768	2.69031e-06
genome	13	6610647	+	75	0	40	0	87	0	106	31	41	6	113	26	260	0.242308	0.522734	4.31721e-18
genome	13	8941893	+	254	1	163	0	191	0	358	9	261	8	369	16	988	0.0334008	0.0995094	1.5063e-06
genome	13	12424107	+	132	0	125	0	137	0	242	26	168	6	228	17	638	0.0768025	0.31918	2.79983e-11
genome	13	12694873	+	219	0	144	0	191	0	355	16	215	9	333	20	903	0.0498339	0.312909	2.91244e-10
genome	13	13661238	+	52	0	23	0	51	0	82	9	67	3	83	10	232	0.0948276	0.286155	4.95321e-05
genome	13	13683392	+	59	0	36	0	51	0	110	10	58	4	115	12	283	0.0918728	0.343243	1.32999e-05
genome	13	13685825	+	92	0	58	0	71	0	156	43	99	28	128	45	383	0.302872	0.614847	5.26253e-27
genome	13	14791424	+	379	1	235	0	371	0	556	14	350	11	561	14	1467	0.0265849	0.12891	2.74475e-08
genome	13	14793981	+	256	1	182	0	224	0	416	11	271	11	395	8	1082	0.0277264	0.0751309	6.50241e-06
genome	13	15293309	+	1048	1	1026	1	1078	2	1342	81	1287	47	1353	42	3982	0.0426921	0.101496	2.78235e-38
genome	13	15293354	+	161	0	94	0	123	0	281	9	178	8	274	14	733	0.042292	0.248043	2.01899e-06
genome	13	20932735	+	174	0	125	1	190	0	290	15	165	7	306	20	761	0.0551905	0.174915	1.01207e-08
genome	13	21364970	+	195	2	161	0	189	0	382	18	255	10	369	13	1006	0.0407555	0.109292	1.86571e-06
genome	13	21900722	+	1354	0	1004	1	1233	1	2055	53	1760	38	2092	57	5907	0.025055	0.0544295	2.46921e-28
genome	13	21994606	+	67	2	82	0	85	0	143	14	97	10	136	18	376	0.111702	0.526155	1.00375e-07
genome	13	21994660	+	1088	0	916	0	1040	1	1676	31	1366	36	1630	29	4672	0.0205479	0.0625087	3.22465e-20
genome	13	21994767	+	325	0	208	0	281	0	599	27	450	25	600	32	1649	0.05094	0.10987	1.12529e-15
genome	13	22466825	+	161	0	118	0	140	0	260	12	178	6	272	18	710	0.0507042	0.156087	3.99296e-08
genome	13	23702379	+	20	0	21	4	11	2	14	10	9	6	8	5	31	0.677419	0.916585	1.87889e-07
genome	13	23718135	+	408	0	296	0	388	0	749	17	537	7	709	18	1995	0.0210526	0.0667089	9.33241e-09
genome	13	23718211	+	1386	0	1029	1	1261	1	2110	56	1798	39	2146	61	6054	0.0257681	0.055999	6.18899e-30
genome	13	23758699	+	399	0	288	0	385	0	738	17	527	7	701	18	1966	0.0213632	0.0676948	9.86096e-09
genome	13	23758775	+	1386	0	1029	1	1261	1	2110	56	1798	39	2146	61	6054	0.0257681	0.055999	6.18899e-30
genome	13	26676548	+	618	0	502	0	584	0	939	20	704	16	977	21	2620	0.0217557	0.0891025	3.10609e-13
genome	13	28442081	+	1430	0	1157	0	1401	0	1973	102	1683	79	2018	89	5674	0.0475855	0.17427	2.54126e-64
genome	13	38389011	+	122	0	82	0	118	0	215	40	117	20	200	38	532	0.184211	0.450337	1.69682e-22
genome	13	41161732	+	204	0	138	0	193	1	373	19	229	17	353	22	955	0.060733	0.18672	7.44175e-11
genome	13	45075038	+	74	0	66	0	81	0	158	3	118	12	166	9	442	0.0542986	0.167239	4.79347e-05
genome	13	49863110	+	244	1	190	0	232	0	445	14	322	8	430	7	1197	0.0242272	0.092852	2.73572e-05
genome	13	49874589	+	235	0	182	0	217	0	401	17	254	15	392	14	1047	0.0439351	0.134538	2.37466e-10
genome	13	51104461	+	300	1	220	0	300	0	559	16	394	6	523	11	1476	0.0223577	0.0681797	5.29832e-06
genome	13	55233907	+	704	0	557	0	710	0	1129	41	759	26	1052	34	2940	0.0343537	0.209436	1.54864e-23
genome	13	55416279	+	121	0	61	0	79	0	175	12	98	15	174	15	447	0.0939597	0.399036	1.93468e-09
genome	13	55470851	+	276	0	246	0	297	0	484	21	306	7	419	14	1209	0.0347395	0.156523	2.74042e-10
genome	13	55472177	+	470	2	463	0	476	0	655	153	566	123	695	151	1916	0.22286	0.607473	1.5734e-108
genome	13	55472393	+	366	0	264	0	347	0	571	35	368	27	593	31	1532	0.060705	0.173425	3.86692e-21
genome	13	55472906	+	305	1	201	0	234	0	453	15	324	9	448	22	1225	0.037551	0.113535	4.91234e-09
genome	13	55742542	+	160	0	121	0	139	0	287	17	217	14	295	10	799	0.0513141	0.157993	2.09056e-08
genome	13	55742620	+	120	0	87	0	109	0	216	8	163	12	227	4	606	0.039604	0.134424	3.60181e-05
genome	13	55744918	+	217	0	123	0	177	0	355	10	211	10	317	7	883	0.0305776	0.109401	3.39368e-06
genome	13	55782898	+	227	0	153	0	203	0	322	15	260	13	347	17	929	0.0484392	0.241594	1.98465e-10
genome	13	55802909	+	192	0	128	0	183	0	251	9	151	6	284	4	686	0.0276968	0.065455	2.60163e-05
genome	13	59773367	+	94	1	72	0	80	0	147	11	112	7	126	9	385	0.0701299	0.197311	1.33473e-05
genome	13	62532965	+	299	0	243	0	267	0	469	10	360	11	423	13	1252	0.0271565	0.163595	3.65087e-08
genome	13	62533130	+	228	1	187	0	210	0	396	168	248	110	357	166	1001	0.443556	0.949203	9.45222e-114
genome	13	66045075	+	193	0	164	0	172	0	317	14	238	5	337	11	892	0.0336323	0.1003	7.12581e-07
genome	13	66098487	+	196	0	167	0	170	0	312	12	234	5	326	9	872	0.0298165	0.087153	3.56001e-06
genome	13	67022494	+	106	0	74	0	87	0	222	18	89	5	164	8	475	0.0652632	0.259773	6.86119e-07
genome	13	67104506	+	51	0	38	0	48	0	50	25	34	11	50	22	134	0.432836	0.87437	5.90294e-22
genome	13	67237568	+	673	0	591	3	675	2	1019	23	888	12	888	21	2795	0.0200358	0.19335	1.00486e-08
genome	13	67238059	+	284	0	222	0	278	0	511	30	373	25	426	20	1310	0.0572519	0.174687	2.32622e-16
genome	13	67958504	+	112	0	114	0	127	1	273	15	206	6	264	19	743	0.0538358	0.15249	1.79168e-06
genome	13	67958691	+	611	2	519	1	628	1	981	19	843	21	875	21	2699	0.022601	0.238118	7.49633e-10
genome	13	67958697	+	809	0	700	1	829	2	1249	62	1111	44	1143	50	3503	0.0445333	0.225306	2.61727e-31
genome	13	67958826	+	1019	1	1008	0	1066	0	1574	57	1462	67	1574	56	4610	0.0390456	0.233266	1.31865e-39
genome	13	67959050	+	239	0	185	2	240	2	449	25	396	14	432	18	1277	0.0446359	0.147218	2.54281e-07
genome	13	69761107	+	235	0	165	0	200	0	406	32	187	11	394	23	987	0.0668693	0.224512	1.03912e-14
genome	13	73466167	+	228	0	153	0	232	0	393	10	218	6	419	9	1030	0.0242718	0.131534	7.62393e-06
genome	13	74501088	+	59	0	31	0	57	0	102	7	60	7	89	7	251	0.0836653	0.367919	4.51983e-05
genome	13	74554663	+	2299	0	2251	2	2241	1	2908	175	3039	139	2796	159	8743	0.0541004	0.205599	4.4791e-115
genome	13	74554724	+	2186	1	1967	1	2053	3	2501	385	2386	351	2316	340	7203	0.149382	0.486897	5.09425e-297
genome	13	74554747	+	2109	0	1924	1	1983	2	2465	56	2342	78	2382	70	7189	0.0283767	0.128939	5.22553e-50
genome	13	74554854	+	2096	4	1996	3	1948	3	2751	106	2853	76	2735	77	8339	0.0310589	0.0914619	9.35326e-49
genome	13	74554917	+	1875	1	1630	0	1829	2	2570	85	2267	72	2559	74	7396	0.0312331	0.0701082	1.20292e-50
genome	13	74555247	+	1231	2	1266	1	1122	2	1625	104	1664	83	1631	93	4920	0.0569106	0.163568	7.03322e-61
genome	13	74555312	+	1291	2	1209	3	1165	4	1857	62	1928	72	1847	97	5632	0.0410156	0.125017	1.47647e-39
genome	13	74555391	+	1858	1	1545	3	1768	2	2488	76	2191	46	2470	59	7149	0.0253182	0.0686474	2.14115e-35
genome	13	74682437	+	62	0	33	0	54	0	134	22	76	11	85	25	295	0.19661	0.647078	6.08021e-12
genome	13	75012956	+	771	0	489	1	768	0	1169	31	716	22	1137	30	3022	0.0274653	0.0936165	6.83342e-18
genome	13	75012980	+	755	1	456	0	674	0	1054	50	687	32	977	48	2718	0.0478293	0.207448	2.7585e-29
genome	13	75013177	+	454	0	322	0	442	0	586	97	436	52	647	76	1669	0.134811	0.502319	2.96749e-57
genome	13	76102572	+	852	0	708	0	840	0	1074	41	840	35	1117	35	3031	0.0366216	0.11038	3.09271e-29
genome	13	76102602	+	249	0	208	0	244	0	450	19	281	6	440	12	1171	0.0315969	0.175537	2.32917e-08
genome	13	76103099	+	36	0	31	0	31	0	49	13	25	1	51	5	125	0.152	0.410742	8.71621e-06
genome	13	80849637	+	27	0	22	1	31	0	99	91	69	65	99	87	267	0.910112	1	3.67223e-55
genome	13	80849685	+	18	0	14	0	27	0	42	41	31	27	46	40	119	0.907563	1	2.68297e-36
genome	13	81212963	+	141	0	103	0	139	0	182	7	146	2	206	12	534	0.0393258	0.0853793	9.90372e-06
genome	13	81213307	+	802	1	731	1	748	0	1192	21	1182	29	1132	31	3506	0.0231033	0.223821	9.16445e-16
genome	13	81213563	+	18	0	13	1	13	0	49	18	27	9	49	19	125	0.368	0.708478	1.04514e-06
genome	13	81934985	+	97	0	57	0	101	0	195	7	103	6	181	11	479	0.0501044	0.145529	2.89725e-05
genome	13	83981098	+	226	2	177	0	243	0	313	13	308	11	401	10	1022	0.0332681	0.125656	5.05235e-06
genome	13	90252589	+	145	0	79	0	97	0	223	44	104	23	182	25	509	0.180747	0.453179	8.53423e-22
genome	13	90252656	+	95	0	78	0	82	0	185	15	119	6	188	7	492	0.0569106	0.203927	6.37522e-06
genome	13	91071823	+	1043	1	771	1	946	1	1484	56	1092	41	1514	51	4090	0.0361858	0.0915616	9.65606e-30
genome	13	91072561	+	1344	0	1077	0	1444	1	1816	97	1280	63	1849	84	4945	0.0493428	0.393278	4.73952e-61
genome	13	91072705	+	2177	0	1905	1	2106	0	2468	502	2278	459	2555	467	7301	0.19559	0.794783	0
genome	13	94554621	+	90	0	55	0	87	0	156	20	60	7	153	12	369	0.105691	0.431905	2.4047e-09
genome	13	97311524	+	56	0	42	0	41	0	90	8	49	2	84	10	223	0.0896861	0.429746	4.39306e-05
genome	13	97631724	+	228	0	160	0	168	0	394	7	235	5	363	9	992	0.0211694	0.188715	8.09386e-05
genome	13	97633391	+	166	0	99	0	124	0	251	9	201	7	269	6	721	0.0305132	0.115841	6.72811e-05
genome	13	99040720	+	310	1	210	0	290	0	437	16	383	18	432	19	1252	0.0423323	0.17998	4.71275e-11
genome	13	99040864	+	632	0	499	0	634	0	929	114	662	84	879	100	2470	0.120648	0.761277	5.70222e-74
genome	13	99041166	+	593	0	457	0	582	0	837	15	687	17	897	21	2421	0.0218918	0.0667582	1.09361e-12
genome	13	99546381	+	100	0	51	0	91	0	193	11	88	7	163	8	444	0.0585586	0.309686	9.36952e-06
genome	13	100552242	+	708	1	542	0	701	0	981	36	754	12	996	25	2731	0.0267301	0.159295	1.72651e-16
genome	13	100790784	+	208	0	186	0	207	0	349	15	208	6	379	22	936	0.0459402	0.231234	3.71492e-10
genome	13	108807122	+	267	1	201	1	252	0	415	22	294	17	399	19	1108	0.0523466	0.161207	4.11132e-11
genome	13	108807556	+	212	0	170	0	173	0	292	13	278	15	299	18	869	0.0529344	0.183055	8.43328e-11
genome	13	108807848	+	1099	0	947	1	1126	0	1554	38	1270	26	1605	42	4429	0.0239332	0.0663635	3.6891e-24
genome	13	113857159	+	211	0	108	0	174	0	286	19	168	9	290	26	744	0.0725806	0.296378	5.37889e-13
genome	13	113857705	+	434	0	276	0	337	0	654	15	399	7	625	13	1678	0.0208582	0.0801774	3.71585e-08
genome	13	113858761	+	209	0	166	0	199	0	394	6	276	8	378	14	1048	0.0267176	0.21119	4.28989e-06
genome	13	113858805	+	395	0	325	0	377	1	785	29	634	17	732	21	2151	0.0311483	0.118118	1.72721e-11
genome	13	116290475	+	332	0	295	2	308	1	601	76	398	39	566	74	1565	0.120767	0.388302	2.97715e-36
genome	13	117366080	+	239	0	179	0	234	0	436	14	288	4	428	6	1152	0.0208333	0.0831523	1.9371e-05
genome	13	120161332	+	236	0	155	0	211	1	406	11	207	7	405	10	1018	0.0275049	0.0509735	2.2579e-05
genome	13	120161648	+	250	0	196	1	207	1	428	18	260	7	402	9	1090	0.0311927	0.0919242	9.69591e-06
genome	13	120162054	+	264	0	194	0	229	0	475	12	312	9	454	15	1241	0.0290089	0.0843368	1.07676e-07
genome	13	120164089	+	177	1	121	0	172	0	333	12	209	5	302	13	844	0.035545	0.242305	1.69546e-05
genome	13	120164159	+	265	0	188	0	254	0	468	18	309	11	458	20	1235	0.0396761	0.204297	1.63534e-10
genome	13	120166644	+	295	0	202	0	291	2	496	26	334	21	484	23	1314	0.0532725	0.179106	1.0305e-12
genome	14	4199663	+	987	1	796	1	937	2	1411	33	1100	21	1355	36	3866	0.0232799	0.138581	9.72236e-17
genome	14	4199672	+	1067	2	882	1	984	0	1522	87	1239	67	1434	77	4195	0.0550656	0.305783	7.36324e-50
genome	14	4199780	+	1560	0	1414	3	1563	2	2127	67	1880	59	2139	59	6146	0.0301009	0.0954481	3.52557e-38
genome	14	4201835	+	41	0	22	0	32	0	77	12	25	6	77	19	179	0.206704	0.507099	3.35893e-08
genome	14	8021963	+	511	0	503	0	539	0	735	23	763	14	788	22	2286	0.0258093	0.0730628	3.83102e-14
genome	14	8353537	+	171	0	130	0	165	0	294	21	200	13	321	22	815	0.0687117	0.743108	4.92001e-12
genome	14	8516611	+	58	0	27	0	61	0	95	9	35	4	96	7	226	0.0884956	0.361495	3.31905e-05
genome	14	8519410	+	93	0	54	0	67	0	143	10	74	5	161	11	378	0.0687831	0.210259	6.22659e-06
genome	14	8691619	+	192	2	172	1	200	1	313	53	248	22	293	44	854	0.139344	0.513426	6.08148e-23
genome	14	13669465	+	574	2	432	1	507	0	802	20	668	19	769	14	2239	0.0236713	0.0749796	2.09241e-09
genome	14	13724724	+	188	0	147	0	144	0	305	9	217	4	282	8	804	0.0261194	0.207163	4.95076e-05
genome	14	13724756	+	318	0	266	1	295	0	587	25	467	6	584	16	1638	0.0286935	0.0991316	2.38872e-08
genome	14	13724767	+	301	0	274	1	274	0	591	30	456	13	589	17	1636	0.0366748	0.137581	1.93253e-10
genome	14	19847348	+	250	0	204	0	198	0	385	10	300	9	414	11	1099	0.0272975	0.0739802	7.35174e-07
genome	14	19855377	+	219	0	170	1	209	0	373	8	221	10	353	13	947	0.032735	0.107626	2.80608e-06
genome	14	20739789	+	114	0	68	0	112	0	196	13	149	6	191	6	536	0.0466418	0.143242	1.45829e-05
genome	14	20753395	+	193	0	128	0	175	0	303	14	188	3	300	12	791	0.0366625	0.126508	6.04961e-07
genome	14	21070735	+	79	0	67	0	82	0	160	11	72	3	140	16	372	0.0806452	0.313562	3.71602e-07
genome	14	21531613	+	87	0	62	0	79	0	184	15	144	13	144	10	472	0.0805085	0.204793	1.88601e-07
genome	14	21719906	+	96	0	65	0	72	0	136	6	103	8	162	8	401	0.0548628	0.294648	3.37671e-05
genome	14	21883917	+	376	0	282	0	356	0	584	19	378	25	588	30	1550	0.0477419	0.149938	3.2923e-17
genome	14	21888084	+	275	0	159	0	215	0	422	13	228	7	400	17	1050	0.0352381	0.343836	1.44413e-08
genome	14	21888642	+	418	0	317	1	418	0	650	15	361	4	662	17	1673	0.0215182	0.0720215	8.64869e-08
genome	14	21890505	+	286	0	146	0	208	1	444	13	218	7	420	16	1082	0.0332717	0.158454	6.39137e-07
genome	14	24541868	+	1081	1	909	1	962	0	1452	102	1078	68	1386	109	3916	0.0712462	0.32816	8.09287e-67
genome	14	24542079	+	1458	2	1284	0	1380	0	2030	159	1842	133	1935	150	5807	0.076115	0.316998	1.41986e-102
genome	14	24546097	+	37	0	20	0	40	0	74	13	37	3	57	10	168	0.154762	0.740965	3.29623e-06
genome	14	26377244	+	212	0	119	0	161	0	298	28	153	10	254	15	705	0.0751773	0.314006	2.82946e-13
genome	14	26377274	+	129	0	71	0	107	0	197	12	105	4	160	4	462	0.04329	0.110538	3.1722e-05
genome	14	26933039	+	174	0	98	0	164	0	269	17	156	6	238	13	663	0.0542986	0.17372	8.5115e-09
genome	14	26933183	+	194	0	144	0	205	0	310	27	200	13	340	28	850	0.08	0.362216	8.66514e-16
genome	14	28939766	+	182	0	147	2	196	0	325	32	245	17	253	15	823	0.0777643	0.640803	2.67027e-12
genome	14	30280783	+	347	0	258	1	291	0	625	36	440	34	519	39	1584	0.0688131	0.205657	6.27275e-21
genome	14	30281796	+	562	0	493	0	533	1	969	34	810	20	922	28	2701	0.0303591	0.0890383	6.84401e-16
genome	14	30287455	+	341	0	257	0	286	2	574	23	418	18	539	29	1531	0.0457218	0.1921	2.93104e-12
genome	14	30290124	+	344	1	287	0	308	0	552	84	312	46	592	81	1456	0.144918	0.534092	3.50413e-47
genome	14	30290304	+	212	0	160	0	199	0	408	30	237	20	383	26	1028	0.07393	0.367265	9.35208e-16
genome	14	30292021	+	368	0	253	1	317	0	599	15	434	9	558	19	1591	0.027027	0.103196	3.07887e-08
genome	14	30292048	+	247	0	162	0	252	0	468	18	343	7	422	15	1233	0.0324412	0.101988	2.79072e-08
genome	14	30293162	+	533	0	415	0	514	0	764	42	574	23	807	29	2145	0.0438228	0.19015	2.60125e-22
genome	14	31093197	+	35	0	21	0	32	0	53	11	34	4	57	8	144	0.159722	0.26711	8.31031e-06
genome	14	31898596	+	99	0	78	0	78	0	173	14	91	4	179	9	443	0.0609481	0.187361	3.45809e-06
genome	14	32047922	+	57	0	43	0	38	0	83	6	43	5	93	9	219	0.0913242	0.28828	4.00395e-05
genome	14	32055670	+	94	0	44	0	80	0	125	21	69	12	104	20	298	0.177852	0.421104	2.66982e-14
genome	14	33892791	+	571	0	440	0	548	0	790	17	520	6	751	19	2061	0.0203785	0.557001	4.43146e-11
genome	14	33892823	+	357	2	279	0	337	2	526	99	295	45	457	80	1278	0.175274	0.465686	4.55961e-53
genome	14	34056161	+	206	0	140	0	184	0	389	11	232	5	359	16	980	0.0326531	0.170592	8.19276e-07
genome	14	34057324	+	410	0	299	1	414	0	681	93	457	56	696	88	1834	0.129226	0.228965	1.32848e-50
genome	14	34060758	+	265	0	180	1	210	0	480	39	250	20	439	38	1169	0.0829769	0.228563	1.53191e-18
genome	14	34065798	+	249	0	150	0	197	0	431	16	244	5	384	15	1059	0.0339943	0.102794	8.40899e-08
genome	14	34468716	+	68	0	32	0	69	0	107	10	61	6	113	8	281	0.0854093	0.255845	8.39458e-06
genome	14	43951335	+	282	0	208	0	281	0	482	5	286	11	448	9	1216	0.0205592	0.0602271	4.23021e-06
genome	14	45568341	+	152	0	112	0	178	0	270	56	114	26	272	41	656	0.1875	0.43758	1.82275e-30
genome	14	45569399	+	282	0	188	0	261	0	351	23	184	10	327	15	862	0.0556845	0.467566	8.50296e-14
genome	14	45578765	+	284	0	231	0	303	1	438	68	280	41	423	48	1141	0.137599	0.819389	8.00498e-38
genome	14	45950926	+	954	4	717	0	913	0	1254	28	970	29	1186	33	3410	0.026393	0.0751336	6.36154e-18
genome	14	45950947	+	804	1	560	0	740	0	1145	145	721	73	1019	113	2885	0.114731	0.48981	5.64252e-81
genome	14	45951123	+	837	0	732	3	839	1	1360	71	1065	41	1336	55	3761	0.0444031	0.25069	2.72005e-31
genome	14	46322378	+	603	1	334	2	533	1	931	23	501	9	859	22	2291	0.0235705	0.063908	2.17141e-08
genome	14	46322403	+	355	0	179	0	283	1	504	19	239	12	467	22	1210	0.0438017	0.414278	1.90901e-11
genome	14	47414664	+	423	0	319	0	399	0	693	17	496	14	685	19	1874	0.0266809	0.0723227	3.67382e-11
genome	14	47548504	+	64	0	49	0	46	0	143	14	119	6	123	10	385	0.0779221	0.235921	2.21744e-05
genome	14	47557501	+	177	0	154	0	163	0	315	11	213	7	331	10	859	0.032596	0.096755	2.53776e-06
genome	14	47557885	+	196	0	181	0	181	0	372	8	269	8	350	10	991	0.0262361	0.25161	8.02671e-06
genome	14	47558448	+	203	0	158	0	179	0	341	8	248	3	328	10	917	0.0229008	0.0795784	5.49276e-05
genome	14	47559610	+	176	0	144	0	142	1	308	14	250	9	299	9	857	0.0373396	0.112827	1.03313e-05
genome	14	47901226	+	103	0	71	0	94	0	145	6	118	5	153	8	416	0.0456731	0.140141	6.68415e-05
genome	14	49840595	+	138	0	75	0	135	0	266	18	155	2	240	7	661	0.0408472	0.373772	9.09985e-06
genome	14	49841528	+	255	0	146	0	235	0	465	10	248	7	438	9	1151	0.0225891	0.074933	9.73954e-06
genome	14	51052397	+	77	0	56	0	72	1	131	11	62	6	127	12	320	0.090625	0.389651	4.48915e-06
genome	14	51163669	+	219	0	166	0	206	1	380	8	234	3	358	15	972	0.026749	0.143915	4.18775e-05
genome	14	51164172	+	179	0	128	0	150	0	350	28	199	9	320	17	869	0.0621404	0.389861	6.8317e-11
genome	14	51164192	+	209	0	154	0	207	1	426	9	232	8	361	9	1019	0.0255152	0.24321	8.98181e-05
genome	14	51189032	+	127	0	101	0	105	0	208	9	126	5	210	10	544	0.0441176	0.110956	8.64398e-06
genome	14	52063947	+	192	0	184	0	224	1	423	12	316	11	385	14	1124	0.0329181	0.0978588	1.53578e-06
genome	14	54604797	+	62	0	43	0	49	0	127	13	79	10	111	16	317	0.123028	0.323037	8.65354e-08
genome	14	54605925	+	150	0	115	0	96	0	227	4	190	8	216	9	633	0.0331754	0.148357	6.77788e-05
genome	14	54667071	+	197	0	154	0	167	0	324	9	216	8	386	10	926	0.0291577	0.115455	5.37264e-06
genome	14	54702021	+	22	0	8	0	21	0	39	8	17	2	34	9	90	0.211111	0.573693	9.08829e-05
genome	14	54755207	+	7	0	6	1	4	0	11	7	7	2	10	9	28	0.642857	0.897471	9.43255e-05
genome	14	55134412	+	445	0	364	2	404	0	674	35	471	26	621	36	1766	0.0549264	0.184974	2.74914e-20
genome	14	55134428	+	535	1	436	0	473	1	804	30	513	13	774	23	2091	0.0315638	0.127213	2.39267e-13
genome	14	55134476	+	313	0	271	0	315	0	514	35	278	29	476	42	1268	0.0835962	0.303553	3.17861e-26
genome	14	55258592	+	180	0	125	0	151	0	304	12	199	8	269	13	772	0.0427461	0.114379	1.71766e-07
genome	14	55785771	+	78	0	44	0	70	0	137	10	63	3	117	8	317	0.0662461	0.57978	3.70417e-05
genome	14	55818401	+	54	0	28	0	53	0	88	7	53	5	86	9	227	0.092511	0.192754	3.85527e-05
genome	14	55990400	+	153	0	121	1	161	0	275	43	208	18	241	32	724	0.128453	0.446927	3.55526e-19
genome	14	57601013	+	430	0	399	0	412	0	674	16	653	10	735	16	2062	0.0203686	0.0660194	2.17309e-09
genome	14	57935489	+	531	2	412	1	488	1	692	78	576	58	743	92	2011	0.113376	0.720017	9.67936e-50
genome	14	59131163	+	1185	0	1026	1	1153	0	1776	119	1423	70	1700	101	4899	0.0591958	0.234434	4.90638e-66
genome	14	59131227	+	42	0	40	0	63	1	110	15	75	16	110	20	295	0.172881	0.424143	5.77161e-09
genome	14	59460725	+	78	0	60	0	69	1	153	11	101	7	123	13	377	0.0822281	0.247639	1.02222e-05
genome	14	63379720	+	94	0	87	0	97	0	210	9	117	5	200	9	527	0.0436433	0.358552	4.94988e-05
genome	14	63380044	+	166	0	124	0	151	0	303	14	236	5	297	15	836	0.0406699	0.127581	4.38124e-07
genome	14	63380065	+	153	1	126	0	135	0	255	10	214	6	270	13	739	0.0392422	0.119165	2.38569e-05
genome	14	69396473	+	293	0	281	2	288	0	370	19	354	10	345	13	1069	0.0392891	0.170819	2.36092e-09
genome	14	69396526	+	821	0	722	0	778	0	1162	49	1040	20	1048	32	3250	0.0310769	0.811635	1.1889e-24
genome	14	69396538	+	781	0	674	0	728	0	1134	41	999	32	1012	35	3145	0.0343402	0.682216	8.73239e-26
genome	14	73819245	+	108	0	94	0	107	0	186	7	103	3	207	13	496	0.046371	0.267983	1.19015e-05
genome	14	73831186	+	106	0	73	0	88	0	166	30	75	19	145	36	386	0.220207	0.628241	5.36342e-22
genome	14	73832816	+	116	0	72	0	89	0	176	11	88	3	162	8	426	0.0516432	0.16472	1.31406e-05
genome	14	74980742	+	200	0	134	0	172	0	309	13	212	3	300	8	821	0.0292326	0.0851183	8.68535e-06
genome	14	76084716	+	1345	2	1170	0	1273	2	1580	63	1433	71	1488	68	4501	0.0448789	0.126016	1.17242e-48
genome	14	76084718	+	1381	0	1208	1	1326	0	1617	362	1481	312	1522	351	4620	0.221861	0.678641	7.89866e-297
genome	14	76085645	+	1471	1	1265	1	1390	1	1827	117	1602	111	1849	130	5278	0.0678287	0.55499	4.76918e-87
genome	14	76390267	+	71	17	48	15	67	15	105	50	90	45	81	47	276	0.514493	0.814382	1.11451e-08
genome	14	76742690	+	249	0	191	0	234	0	485	11	305	7	444	7	1234	0.0202593	0.0530506	1.70103e-05
genome	14	76743907	+	228	0	144	1	227	0	344	11	162	7	370	8	876	0.0296804	0.0901578	1.31831e-05
genome	14	76744409	+	318	0	251	0	298	0	519	23	412	13	527	24	1458	0.0411523	0.125466	4.35515e-13
genome	14	77777832	+	16	0	16	0	17	0	40	10	24	6	24	4	88	0.227273	0.826437	5.92299e-05
genome	14	113552316	+	318	0	194	1	306	0	515	23	322	8	539	19	1376	0.0363372	0.137427	1.05864e-09
genome	14	113552567	+	311	0	255	0	308	1	583	13	369	12	580	14	1532	0.0254569	0.122387	2.9156e-07
genome	14	113552898	+	347	0	283	0	334	0	564	50	425	40	556	63	1545	0.0990291	0.257143	2.85422e-34
genome	14	113553031	+	240	1	150	1	203	0	429	20	230	7	344	12	1003	0.0388833	0.273013	1.32092e-06
genome	14	113553168	+	228	0	156	0	186	0	453	13	254	6	372	10	1079	0.0268767	0.35871	3.98933e-06
genome	14	113553765	+	435	0	389	0	469	1	760	91	534	56	661	71	1955	0.111509	0.613655	4.85071e-49
genome	14	113553982	+	562	0	385	0	450	0	798	26	576	15	735	25	2109	0.0312945	0.0948056	1.78851e-15
genome	14	119517093	+	207	0	155	1	170	0	369	10	270	8	414	14	1053	0.0303894	0.710332	2.11228e-05
genome	14	121159613	+	275	0	195	0	219	0	501	20	303	7	416	9	1220	0.0295082	0.222393	8.27346e-08
genome	14	121160458	+	262	0	173	0	213	0	457	14	270	3	390	9	1117	0.0232766	0.221565	6.12411e-06
genome	14	121160955	+	306	0	262	0	289	0	528	13	418	21	499	23	1445	0.0394464	0.119841	1.94986e-12
genome	14	121170542	+	183	0	132	0	177	0	321	10	206	6	317	10	844	0.0308057	0.183537	5.6405e-06
genome	14	121176045	+	212	0	125	0	175	0	359	9	212	5	350	9	921	0.0249729	0.241398	3.4762e-05
genome	14	121176297	+	399	0	259	0	334	0	532	14	302	3	509	10	1343	0.0201042	0.0695162	2.92132e-07
genome	14	121176890	+	347	0	215	0	296	0	472	38	259	15	438	29	1169	0.0701454	0.523309	7.18716e-21
genome	14	121176902	+	335	0	225	1	270	0	464	12	301	8	471	15	1236	0.0283172	0.0730947	1.95258e-07
genome	14	121179088	+	252	0	159	0	244	1	421	13	208	13	451	20	1080	0.0425926	0.125066	4.40528e-09
genome	14	121184209	+	283	0	221	0	246	0	520	14	305	9	428	17	1253	0.0319234	0.14323	5.59515e-09
genome	14	122387360	+	137	0	119	0	134	0	240	12	219	3	259	9	718	0.0334262	0.0902629	2.61934e-05
genome	15	5146781	+	874	0	674	0	778	0	1237	51	874	43	1103	36	3214	0.040448	0.133212	5.93794e-32
genome	15	6683496	+	557	0	502	0	521	0	866	29	734	25	827	26	2427	0.0329625	0.129751	2.25465e-18
genome	15	6683842	+	230	1	163	0	238	0	429	8	257	3	431	15	1117	0.0232766	0.0808651	8.30674e-05
genome	15	8004816	+	1155	1	961	0	1254	0	1543	67	1256	40	1712	77	4511	0.0407892	0.209188	4.15398e-44
genome	15	8182647	+	68	0	52	0	67	0	124	11	85	9	115	6	324	0.0802469	0.207626	4.88224e-06
genome	15	12181651	+	96	0	73	0	93	0	182	11	111	11	203	13	496	0.0705645	0.486157	2.32347e-07
genome	15	12848195	+	170	1	117	0	129	0	248	12	147	3	248	11	643	0.0404355	0.207639	2.17603e-05
genome	15	12866669	+	134	0	85	0	129	1	222	16	102	2	199	9	523	0.0516252	0.14413	9.62301e-06
genome	15	12901234	+	128	0	83	0	120	0	223	43	139	23	238	31	600	0.161667	0.432386	1.50238e-20
genome	15	12901240	+	113	0	85	0	114	0	213	10	140	4	221	8	574	0.0383275	0.164764	6.16135e-05
genome	15	12905735	+	113	0	87	0	101	0	215	15	122	4	179	10	516	0.0562016	0.470087	1.20946e-06
genome	15	12907422	+	124	0	89	0	121	0	268	11	113	6	200	8	581	0.0430293	0.152382	9.66245e-06
genome	15	22935973	+	553	0	468	0	534	0	736	156	618	134	754	178	2108	0.222011	0.609577	7.07827e-124
genome	15	23490409	+	152	0	113	1	175	0	254	14	164	4	260	7	678	0.0368732	0.161485	3.43942e-05
genome	15	25786008	+	87	0	62	0	72	0	196	13	96	9	152	9	444	0.0698198	0.20635	2.53635e-06
genome	15	25800245	+	107	0	91	0	110	0	219	11	120	4	196	12	535	0.0504673	0.155345	3.64088e-06
genome	15	25810473	+	163	0	135	0	162	0	305	15	215	11	310	14	830	0.0481928	0.148176	1.54913e-08
genome	15	25813056	+	82	0	48	0	60	0	154	10	91	4	112	13	357	0.0756303	0.214092	6.94552e-06
genome	15	25984555	+	139	0	117	0	162	0	258	13	169	5	266	8	693	0.037518	0.140497	3.91117e-06
genome	15	27025735	+	656	0	543	0	650	0	790	27	653	32	828	24	2271	0.0365478	0.110168	1.70564e-22
genome	15	34083261	+	172	0	89	0	149	0	241	12	203	11	279	25	723	0.06639	0.264084	2.40567e-10
genome	15	34083355	+	157	0	89	0	154	0	286	10	204	11	276	15	766	0.0469974	0.144377	2.01987e-07
genome	15	34083381	+	118	0	71	0	105	0	208	28	154	25	207	28	569	0.142355	0.563057	2.70588e-16
genome	15	34118092	+	97	0	61	0	96	0	188	12	98	6	175	10	461	0.0607375	0.250542	3.40608e-06
genome	15	34273423	+	58	0	45	0	44	0	85	14	63	8	79	9	227	0.136564	0.752224	7.95542e-08
genome	15	34530032	+	138	0	115	1	126	0	253	16	160	8	223	11	636	0.0550314	0.169488	7.95783e-07
genome	15	34530402	+	94	0	56	0	73	0	178	9	104	3	165	11	447	0.0514541	0.15843	7.46749e-05
genome	15	38238354	+	66	0	43	0	55	0	89	25	46	9	77	13	212	0.221698	0.611329	1.62393e-13
genome	15	38238887	+	170	1	142	0	137	0	334	11	301	11	294	12	929	0.0365985	0.133658	1.52341e-05
genome	15	38238944	+	370	0	351	1	323	0	681	13	677	26	645	21	2003	0.0299551	0.0876349	1.89088e-10
genome	15	38982760	+	93	0	48	0	81	0	122	5	82	6	156	12	360	0.0638889	0.447526	1.20566e-05
genome	15	47403414	+	68	1	110	0	61	1	143	25	128	9	113	14	384	0.125	0.560572	5.46076e-09
genome	15	47403460	+	106	4	157	1	74	2	181	26	177	15	147	27	505	0.134653	0.700383	7.46458e-10
genome	15	51952672	+	209	1	219	0	192	0	344	17	351	14	363	7	1058	0.0359168	0.0967827	2.92546e-07
genome	15	51953156	+	288	1	212	0	251	0	610	19	461	11	567	14	1638	0.026862	0.0767931	7.70872e-07
genome	15	51953246	+	605	1	563	2	575	1	853	349	779	347	822	349	2454	0.425835	0.944465	5.44097e-287
genome	15	55735527	+	185	0	152	0	150	0	315	12	177	4	297	12	789	0.035488	0.1066	1.18413e-06
genome	15	55740121	+	232	1	199	1	220	0	374	9	319	11	364	12	1057	0.0302744	0.161067	1.66111e-05
genome	15	58304388	+	33	0	29	0	35	0	62	13	28	9	61	16	151	0.251656	0.53597	7.87896e-10
genome	15	59083350	+	791	1	650	1	821	0	1197	62	1033	45	1202	72	3432	0.0521562	0.256618	1.83669e-37
genome	15	59189765	+	141	0	120	0	146	0	218	11	190	10	258	12	666	0.0495495	0.182875	1.07327e-07
genome	15	59849659	+	252	1	184	0	224	0	390	8	257	4	401	12	1048	0.0229008	0.211258	7.6123e-05
genome	15	60340238	+	596	0	510	2	481	0	767	57	585	50	734	57	2086	0.0786194	0.700041	8.0102e-39
genome	15	60340672	+	117	0	81	0	103	0	183	7	134	2	175	11	492	0.0406504	0.133307	6.14867e-05
genome	15	60340707	+	209	2	196	1	204	0	321	18	291	11	339	20	951	0.0515247	0.13641	2.82192e-08
genome	15	60341186	+	798	2	745	0	787	0	1219	25	1268	25	1299	30	3786	0.0211305	0.0812113	8.10574e-15
genome	15	71666551	+	196	0	144	0	158	0	355	12	215	6	325	14	895	0.0357542	0.107499	5.80981e-07
genome	15	76221802	+	101	0	90	0	75	0	162	40	152	30	165	45	479	0.240084	0.682209	3.09831e-25
genome	15	76229081	+	280	0	177	0	211	2	478	26	242	8	371	12	1091	0.0421632	0.175439	3.6349e-08
genome	15	76237083	+	71	0	67	0	77	0	187	21	111	7	150	17	448	0.100446	0.248295	1.02269e-08
genome	15	76311404	+	18	0	14	0	19	0	26	8	18	3	30	6	74	0.22973	0.885598	5.74288e-05
genome	15	76789048	+	2108	0	1920	1	2039	0	2871	78	2684	109	2846	100	8401	0.0341626	0.0742927	2.70654e-67
genome	15	76789149	+	814	0	655	0	757	0	1211	22	892	10	1191	36	3294	0.0206436	0.0717988	4.27458e-16
genome	15	76789191	+	1141	1	1039	1	1150	2	1637	34	1358	30	1594	29	4589	0.0202659	0.0827528	7.43925e-18
genome	15	78877388	+	30	0	26	0	40	0	64	46	46	29	64	43	174	0.678161	0.916982	1.77883e-33
genome	15	78918225	+	168	0	149	0	164	0	286	51	188	39	266	40	740	0.175676	0.530977	3.8437e-31
genome	15	78961230	+	247	0	179	1	201	0	356	100	159	37	346	81	861	0.253194	0.722106	2.63357e-56
genome	15	78966096	+	275	0	196	0	241	1	478	26	357	24	418	34	1253	0.0670391	0.205236	4.43437e-16
genome	15	78969811	+	427	0	333	0	394	1	680	14	452	10	660	16	1792	0.0223214	0.121588	3.2867e-08
genome	15	78969848	+	373	0	283	0	355	0	631	18	441	14	580	24	1652	0.0338983	0.426818	1.70305e-12
genome	15	78970735	+	300	0	174	0	256	1	440	29	271	11	387	21	1098	0.0555556	0.18692	4.13677e-13
genome	15	78973693	+	238	0	152	0	190	0	443	21	271	4	395	11	1109	0.0324617	0.096294	2.17079e-07
genome	15	78973704	+	254	0	152	0	195	0	431	17	283	7	410	9	1124	0.0293594	0.254906	6.15201e-07
genome	15	78973755	+	282	0	197	0	258	0	501	15	298	5	479	9	1278	0.0226917	0.23891	1.63807e-06
genome	15	78973829	+	327	0	213	1	314	0	526	35	376	32	519	40	1421	0.0752991	0.294894	1.22238e-21
genome	15	78978547	+	459	1	263	0	426	0	705	63	353	26	677	53	1735	0.0818444	0.253536	2.63368e-31
genome	15	79025589	+	151	0	124	1	141	0	271	10	170	3	262	14	703	0.0384068	0.11639	3.30834e-05
genome	15	79035891	+	341	0	225	0	314	0	578	20	401	12	535	23	1514	0.0363276	0.189302	7.85914e-12
genome	15	79555432	+	215	0	174	0	217	0	410	8	256	12	390	15	1056	0.0331439	0.140402	1.03587e-07
genome	15	79556136	+	208	0	158	0	175	0	363	29	255	14	373	23	991	0.0665994	0.312028	1.4766e-13
genome	15	79556624	+	227	0	188	1	192	0	399	10	299	8	382	11	1080	0.0268519	0.118762	2.44591e-05
genome	15	79556744	+	174	0	105	0	152	0	295	56	182	32	292	54	769	0.184655	0.547668	1.97662e-30
genome	15	79782336	+	108	0	83	0	98	0	216	8	117	7	222	9	555	0.0432432	0.122921	3.5899e-05
genome	15	80139737	+	410	0	336	0	428	0	651	19	565	17	666	28	1882	0.0340064	0.17865	2.20702e-14
genome	15	80139851	+	213	0	200	1	212	0	453	23	283	9	403	19	1139	0.0447761	0.137256	2.67395e-09
genome	15	80140845	+	511	1	365	0	515	2	777	16	563	15	844	17	2184	0.021978	0.142149	6.10641e-08
genome	15	80140862	+	618	1	447	0	640	0	934	68	690	26	1006	62	2630	0.0593156	0.120042	1.38778e-33
genome	15	80141251	+	439	0	387	0	392	0	781	17	708	18	730	19	2219	0.0243353	0.0659855	4.34726e-11
genome	15	80141352	+	223	0	180	0	195	0	451	21	319	7	402	16	1172	0.0375427	0.127904	1.00245e-08
genome	15	80141367	+	245	0	201	0	209	0	491	12	337	8	432	11	1260	0.0246032	0.0534336	2.03559e-06
genome	15	80141562	+	357	1	220	0	320	1	556	18	279	8	616	18	1451	0.0303239	0.0889161	8.28375e-08
genome	15	80844670	+	190	0	136	0	150	0	276	5	224	10	278	5	778	0.0257069	0.0737836	6.49872e-05
genome	15	80853205	+	52	1	56	0	32	0	83	15	60	11	78	18	221	0.199095	0.494792	1.3347e-09
genome	15	81352401	+	383	0	305	0	370	0	644	19	460	14	586	25	1690	0.0343195	0.168698	3.87127e-13
genome	15	81359309	+	296	0	201	0	266	0	497	8	343	7	473	14	1313	0.0220868	0.211988	1.51404e-06
genome	15	81551588	+	140	0	121	0	130	0	261	8	171	5	238	9	670	0.0328358	0.099423	3.56241e-05
genome	15	81566171	+	122	0	103	0	126	0	235	16	133	6	254	8	622	0.0482315	0.154767	1.14244e-06
genome	15	81572255	+	122	0	108	0	105	0	254	10	189	4	235	9	678	0.0339233	0.11452	8.60323e-05
genome	15	81787684	+	167	0	140	0	181	0	257	27	163	12	246	19	666	0.0870871	0.421657	4.74142e-15
genome	15	81791716	+	220	0	188	0	228	0	396	15	295	9	405	10	1096	0.0310219	0.0839161	1.44516e-07
genome	15	81793810	+	178	0	151	0	210	0	349	11	264	8	338	19	951	0.0399579	0.121533	2.95858e-08
genome	15	81794090	+	256	0	195	1	267	0	427	12	255	3	415	13	1097	0.0255242	0.0826186	8.04221e-06
genome	15	81796098	+	184	0	128	0	143	0	350	11	218	3	310	10	878	0.0273349	0.0784618	3.98698e-05
genome	15	81796200	+	227	0	152	0	188	0	365	11	207	3	359	14	931	0.0300752	0.285929	1.40745e-06
genome	15	81797447	+	201	1	149	0	157	0	384	17	256	9	355	6	995	0.0321608	0.185864	1.91878e-05
genome	15	81856954	+	218	1	173	0	250	0	485	26	347	10	477	28	1309	0.0488923	0.15039	1.12964e-10
genome	15	82061753	+	174	0	103	0	146	0	310	13	236	9	283	11	829	0.039807	0.174755	9.90423e-07
genome	15	82063625	+	196	0	129	0	208	0	372	25	213	13	373	21	958	0.0615866	0.113587	2.39037e-12
genome	15	82081852	+	220	0	137	0	191	0	362	8	230	7	339	10	931	0.0268528	0.285343	8.35472e-06
genome	15	82088292	+	245	0	178	0	206	1	396	15	268	8	342	7	1006	0.0298211	0.178373	5.06697e-06
genome	15	82232184	+	157	0	112	1	145	0	311	15	220	13	283	15	814	0.0528256	0.162692	2.2844e-07
genome	15	84080007	+	267	1	236	0	330	0	475	16	270	12	483	19	1228	0.0382736	0.120495	3.83197e-10
genome	15	84082844	+	266	0	192	0	284	0	487	14	257	9	430	14	1174	0.0315162	0.308325	1.07659e-08
genome	15	84086512	+	446	0	311	0	453	0	654	19	413	15	669	24	1736	0.0334101	0.119004	3.20254e-14
genome	15	84091078	+	340	0	260	0	283	0	526	8	396	9	539	18	1461	0.0239562	0.0831848	5.58148e-08
genome	15	84092060	+	182	0	131	0	201	0	372	15	207	2	346	18	925	0.0378378	0.277543	1.51692e-07
genome	15	84095329	+	384	0	297	0	419	0	562	52	439	29	584	59	1585	0.0883281	0.382293	6.39437e-34
genome	15	84098331	+	373	0	279	0	373	1	543	24	368	11	569	22	1480	0.0385135	0.121208	1.48897e-12
genome	15	84817817	+	124	0	88	0	128	0	216	10	132	5	266	14	614	0.0472313	0.145122	2.21285e-06
genome	15	84819580	+	193	0	137	0	187	0	333	9	253	7	315	8	901	0.0266371	0.0759977	1.67479e-05
genome	15	85220626	+	160	0	138	0	163	0	299	8	306	5	340	15	945	0.0296296	0.0865024	1.29004e-05
genome	15	85243788	+	253	0	143	0	224	0	371	11	257	3	355	6	983	0.0203459	0.122214	5.24303e-05
genome	15	85243824	+	282	0	192	1	256	0	394	14	260	4	394	9	1048	0.0257634	0.0784855	6.75193e-06
genome	15	85249492	+	483	2	312	1	473	0	661	24	433	19	699	19	1793	0.0345789	0.162465	8.95093e-12
genome	15	85249532	+	328	0	230	0	359	0	517	17	366	8	489	14	1372	0.0284257	0.114775	1.71881e-09
genome	15	85346608	+	185	0	71	0	175	0	315	15	125	11	330	21	770	0.061039	0.174286	5.01449e-10
genome	15	85347210	+	208	0	137	0	196	0	335	10	187	8	321	14	843	0.0379597	0.366829	1.01905e-07
genome	15	85347372	+	141	0	107	0	137	0	267	14	131	9	242	9	640	0.05	0.43844	2.11202e-07
genome	15	85752986	+	127	0	108	1	124	0	237	12	152	11	236	9	625	0.0512	0.173322	4.77739e-06
genome	15	85757916	+	176	0	150	0	176	0	378	13	268	9	349	11	995	0.0331658	0.0895781	1.16716e-06
genome	15	86079270	+	132	0	103	2	115	0	66	29	46	20	53	21	165	0.424242	0.779348	1.70074e-37
genome	15	86079276	+	135	0	109	1	117	1	68	28	49	25	56	28	173	0.468208	0.971895	4.54284e-44
genome	15	88747679	+	278	0	213	0	240	0	503	15	364	5	479	10	1346	0.0222883	0.121417	1.98727e-06
genome	15	88748592	+	282	0	226	0	270	0	457	14	388	8	432	9	1277	0.0242756	0.0930323	3.42055e-07
genome	15	88748986	+	174	0	131	0	187	0	287	4	174	5	316	11	777	0.02574	0.138905	4.98253e-05
genome	15	88749056	+	217	0	197	0	195	0	405	11	295	9	390	14	1090	0.0311927	0.0843686	2.31436e-07
genome	15	89247988	+	176	0	137	0	188	0	332	6	231	5	355	11	918	0.0239651	0.232014	6.30723e-05
genome	15	89254654	+	203	0	120	0	177	0	302	13	147	6	273	13	722	0.0443213	0.202373	3.64699e-08
genome	15	98934979	+	1336	4	1302	1	1350	2	1929	106	1780	55	1885	101	5594	0.0468359	0.143862	2.15938e-52
genome	15	98935261	+	1743	0	1712	3	1642	3	2405	70	2457	32	2239	60	7101	0.0228137	0.221033	6.84535e-31
genome	15	98935344	+	1489	0	1425	2	1508	3	2081	57	2171	42	2120	60	6372	0.0249529	0.0676592	2.13745e-30
genome	15	98935617	+	708	0	632	2	729	0	1082	36	901	14	1055	25	3038	0.0246873	0.072338	4.25951e-15
genome	15	98935752	+	1796	4	1684	7	1780	0	2387	133	1981	122	2399	131	6767	0.0570415	0.174109	3.84597e-82
genome	15	98935795	+	2018	0	1857	1	2024	0	2604	68	2166	58	2738	47	7508	0.0230421	0.0884221	8.84727e-43
genome	15	99306882	+	354	0	266	1	334	0	635	24	450	15	624	22	1709	0.0356934	0.0663102	2.80733e-11
genome	15	99307158	+	306	0	228	0	281	0	499	17	284	2	480	9	1263	0.0221694	0.0702481	7.82776e-07
genome	15	99307688	+	150	0	76	1	107	1	229	11	140	7	195	13	564	0.0549645	0.296663	3.55831e-05
genome	15	99603572	+	132	0	91	0	149	1	250	8	151	9	250	9	651	0.0399386	0.142283	7.00164e-05
genome	15	99610894	+	186	0	177	0	182	0	358	9	270	6	305	6	933	0.022508	0.0610127	5.85963e-05
genome	15	99611255	+	168	0	111	1	172	0	314	15	178	1	299	11	791	0.034134	0.0805318	4.79143e-05
genome	15	99625827	+	159	0	125	0	165	0	267	15	196	8	241	12	704	0.0497159	0.436913	2.26049e-08
genome	15	101987106	+	6	0	2	0	7	0	6	6	3	3	9	8	18	0.944444	1	1.54268e-08
genome	15	102003165	+	278	1	188	0	299	0	468	7	274	4	529	19	1271	0.0236035	0.0512268	7.9308e-06
genome	15	102003717	+	433	0	342	0	424	1	677	29	473	20	704	12	1854	0.0329018	0.0978029	1.04858e-12
genome	15	102004070	+	257	0	161	0	226	0	410	10	213	7	416	11	1039	0.026949	0.100041	1.18452e-06
genome	15	102004742	+	323	2	235	1	272	0	205	205	112	112	234	234	551	1	1	0
genome	15	102004785	+	326	0	232	0	283	1	486	32	354	17	467	16	1307	0.0497322	0.207044	1.35818e-13
genome	15	102005125	+	254	0	180	0	226	0	406	22	287	11	430	17	1123	0.0445236	0.639944	6.04981e-11
genome	15	102005313	+	196	0	128	0	189	0	397	7	227	4	350	12	974	0.023614	0.078305	5.42353e-05
genome	15	102220865	+	92	0	64	0	82	0	176	8	72	3	146	10	394	0.0532995	0.219626	3.98709e-05
genome	15	102221708	+	111	0	82	0	82	0	187	40	104	25	188	39	479	0.217119	0.461819	3.13027e-23
genome	15	102228315	+	140	0	105	0	129	0	250	4	184	8	235	11	669	0.0343797	0.102844	3.19346e-05
genome	15	102228870	+	133	0	124	0	120	0	247	7	182	5	247	15	676	0.0399408	0.121477	5.25394e-06
genome	15	102231067	+	50	0	35	0	43	0	107	9	70	6	103	12	280	0.0964286	0.277081	2.5408e-05
genome	15	102240349	+	111	0	77	0	92	0	198	9	131	9	188	8	517	0.0502901	0.154789	1.03334e-05
genome	15	102368845	+	30	0	24	0	32	0	48	34	36	31	42	30	126	0.753968	0.968822	2.4194e-33
genome	15	102387115	+	597	0	433	0	527	0	920	21	670	17	858	20	2448	0.0236928	0.0721049	3.05246e-13
genome	15	102391693	+	371	0	291	0	336	1	632	47	417	33	594	46	1643	0.076689	0.178275	8.21031e-26
genome	15	102399145	+	664	2	414	0	587	0	886	20	519	5	880	21	2285	0.0201313	0.247424	2.08117e-09
genome	15	102407020	+	366	0	293	1	286	0	704	20	580	22	693	22	1977	0.0323723	0.141351	2.19102e-10
genome	15	102431853	+	68	0	44	0	77	0	124	10	105	6	131	9	360	0.0694444	0.212153	1.94434e-05
genome	15	103149988	+	882	0	722	0	890	1	1299	34	862	16	1318	35	3479	0.0244323	0.422928	2.67305e-19
genome	15	103150335	+	586	0	475	0	603	0	921	26	549	20	921	20	2391	0.0276035	0.129669	4.97296e-16
genome	15	103150494	+	951	1	639	2	950	0	1349	36	856	28	1320	37	3525	0.0286525	0.097845	1.25274e-20
genome	15	103150518	+	992	1	662	1	903	0	1322	56	886	54	1228	58	3436	0.0488941	0.211389	1.21592e-38
genome	15	103150682	+	910	2	713	1	860	0	1304	38	933	17	1336	37	3573	0.0257487	0.0728474	5.31417e-18
genome	15	103150888	+	1008	2	832	0	974	0	1180	175	876	117	1218	161	3274	0.138363	0.510054	4.11501e-125
genome	15	103152156	+	959	1	783	0	905	0	1294	34	1000	29	1314	40	3608	0.0285477	0.0827234	5.91099e-24
genome	15	103152391	+	453	0	355	0	380	0	732	17	456	9	700	12	1888	0.0201271	0.091362	7.6114e-09
genome	15	103153250	+	384	0	185	0	329	0	626	53	272	15	556	40	1454	0.0742779	0.311119	5.69191e-24
genome	15	103203165	+	390	0	286	0	366	0	649	24	508	12	613	12	1770	0.0271186	0.113362	1.76158e-10
genome	15	103204983	+	273	1	199	0	273	0	460	8	308	3	503	16	1271	0.0212431	0.0710054	3.90564e-05
genome	15	103207174	+	221	0	184	0	187	0	397	10	303	8	361	13	1061	0.0292177	0.0887891	9.15082e-07
genome	15	103207841	+	308	0	244	0	260	1	433	13	373	10	449	12	1255	0.0278884	0.0755652	3.23004e-07
genome	15	103208215	+	243	0	169	0	243	0	407	17	241	10	430	23	1078	0.0463822	0.123583	3.1602e-11
genome	15	103857724	+	416	0	308	1	390	2	651	15	428	15	650	26	1729	0.0323887	0.0875305	1.26507e-09
genome	15	103858556	+	128	0	100	0	114	0	237	27	144	11	233	17	614	0.0895765	0.461564	1.069e-11
genome	16	4511121	+	88	0	49	0	60	0	131	9	103	3	153	10	387	0.0568475	0.175029	9.5131e-05
genome	16	4525355	+	54	0	37	0	45	0	93	9	73	6	94	7	260	0.0846154	0.213978	6.93776e-05
genome	16	4525394	+	93	0	62	0	85	0	179	14	105	7	169	9	453	0.0662252	0.171898	2.04698e-06
genome	16	4583942	+	66	0	43	0	50	1	133	12	81	12	109	13	323	0.114551	0.402679	2.54235e-06
genome	16	4758370	+	85	0	87	0	103	1	174	10	132	7	182	17	488	0.0696721	0.229019	2.26012e-06
genome	16	9988175	+	78	0	71	0	85	0	155	7	69	0	155	12	379	0.0501319	0.158305	9.02747e-05
genome	16	10241277	+	72	0	50	0	68	0	130	20	84	8	124	19	338	0.139053	0.34959	2.26106e-10
genome	16	10619396	+	358	0	297	3	339	2	577	23	499	15	537	21	1613	0.0365778	0.108245	2.59027e-08
genome	16	10961775	+	27	6	11	1	14	2	18	13	12	6	16	12	46	0.673913	0.959293	4.22696e-07
genome	16	10961819	+	89	1	65	1	49	0	105	20	97	8	91	20	293	0.163823	0.593033	4.98618e-10
genome	16	10961835	+	104	1	79	1	66	1	168	61	145	45	141	51	454	0.345815	0.801694	6.91282e-31
genome	16	10962113	+	85	1	61	0	53	0	37	10	33	4	35	6	105	0.190476	0.860588	2.40237e-09
genome	16	10962143	+	61	1	34	1	31	1	17	2	14	6	17	9	48	0.354167	0.641225	1.68535e-08
genome	16	10962151	+	54	0	26	0	26	3	19	10	11	4	12	6	42	0.47619	0.946557	1.94528e-10
genome	16	13610861	+	191	1	160	0	197	0	393	14	274	11	356	6	1023	0.030303	0.0902678	1.71783e-05
genome	16	13631282	+	140	1	106	0	129	0	247	23	168	13	222	21	637	0.0894819	0.255153	3.06036e-11
genome	16	15270070	+	569	2	384	0	517	0	948	153	579	75	914	128	2441	0.145842	0.367284	3.70873e-74
genome	16	15270104	+	737	0	634	0	717	0	1147	67	814	46	1171	68	3132	0.0577905	0.177887	8.18565e-42
genome	16	15270140	+	127	1	94	0	106	0	208	41	134	24	205	27	547	0.16819	0.404105	3.18179e-19
genome	16	16058465	+	27	0	24	0	33	0	36	4	19	3	49	8	104	0.144231	0.359654	8.54635e-05
genome	16	16742461	+	31	0	33	0	39	0	71	11	50	1	60	8	181	0.110497	0.611644	8.15527e-05
genome	16	16853370	+	168	1	153	0	167	0	355	19	236	12	335	15	926	0.049676	0.15286	4.09263e-08
genome	16	16861805	+	172	0	126	0	153	0	282	10	214	9	307	9	803	0.0348692	0.151285	3.19721e-06
genome	16	16862623	+	152	0	117	0	142	0	274	12	223	4	257	5	754	0.0278515	0.0802804	9.74167e-05
genome	16	16862918	+	149	0	73	0	132	0	242	12	157	9	209	12	608	0.0542763	0.143184	1.91021e-07
genome	16	16955352	+	56	0	48	1	71	0	230	60	132	30	237	61	599	0.252087	0.479411	4.36769e-18
genome	16	16955538	+	117	0	76	0	114	0	190	10	110	9	205	13	505	0.0633663	0.466568	1.70845e-07
genome	16	17460358	+	119	0	82	0	95	0	181	7	155	9	180	9	516	0.0484496	0.14899	9.61265e-06
genome	16	17830036	+	15	1	12	0	7	0	15	13	6	5	8	6	29	0.827586	0.987547	1.66191e-11
genome	16	18735212	+	102	0	80	0	78	0	157	10	114	6	166	4	437	0.0457666	0.153522	7.46077e-05
genome	16	20320229	+	320	0	247	0	310	0	571	11	413	21	560	12	1544	0.0284974	0.0825473	2.0268e-09
genome	16	20320550	+	232	0	145	0	189	0	359	10	254	6	341	12	954	0.0293501	0.185365	1.86482e-06
genome	16	20320700	+	379	1	245	1	356	0	549	22	356	14	521	25	1426	0.042777	0.133752	2.8982e-12
genome	16	20320703	+	381	0	249	0	365	0	564	25	351	19	528	16	1443	0.04158	0.147125	1.2932e-14
genome	16	20320998	+	217	0	191	0	201	0	363	16	292	13	331	16	986	0.0456389	0.263703	2.68885e-10
genome	16	20324231	+	177	0	136	0	201	0	353	15	183	5	372	9	908	0.0319383	0.11496	1.901e-06
genome	16	20324308	+	213	0	200	1	218	0	372	10	209	6	401	13	982	0.0295316	0.112306	5.98699e-06
genome	16	20359086	+	302	0	284	0	283	0	482	13	386	6	457	14	1325	0.0249057	0.113292	5.04494e-08
genome	16	20359999	+	272	0	200	2	254	0	444	130	256	85	374	121	1074	0.312849	0.530964	5.24635e-83
genome	16	20360560	+	315	1	243	0	277	0	484	189	346	131	458	181	1288	0.388975	0.697287	3.08191e-128
genome	16	20361497	+	319	0	263	0	308	1	552	28	442	20	518	24	1512	0.047619	0.138824	5.03646e-14
genome	16	20362291	+	387	0	333	1	395	0	622	24	573	11	639	21	1834	0.0305344	0.089646	4.59387e-11
genome	16	20471372	+	272	0	186	0	268	0	455	21	269	9	409	11	1133	0.0361871	0.108958	1.14239e-09
genome	16	20473302	+	248	0	168	0	221	1	408	18	268	16	417	13	1093	0.0430009	0.408271	5.48241e-09
genome	16	20473786	+	272	0	209	0	260	0	467	7	339	9	431	12	1237	0.0226354	0.107517	1.74458e-06
genome	16	20474034	+	418	0	340	0	399	0	634	14	552	10	660	21	1846	0.024377	0.11132	2.5091e-10
genome	16	20474083	+	430	0	360	1	383	1	644	9	521	15	699	19	1864	0.0230687	0.219906	1.03253e-07
genome	16	20474093	+	431	0	360	0	378	0	691	28	530	15	706	30	1927	0.0378827	0.114643	5.49036e-16
genome	16	20474447	+	239	0	165	0	213	0	447	7	296	7	407	10	1150	0.0208696	0.114068	3.06381e-05
genome	16	20475310	+	300	1	211	0	259	0	539	14	346	8	488	11	1373	0.024035	0.0667287	4.72025e-06
genome	16	20475362	+	218	0	163	0	239	1	466	12	265	6	403	16	1134	0.0299824	0.183983	4.02759e-06
genome	16	20478709	+	425	1	359	1	433	1	756	31	532	25	730	38	2018	0.0465808	0.143047	2.11785e-16
genome	16	20483512	+	163	1	120	0	142	0	251	17	162	8	230	12	643	0.0575428	0.654874	7.46369e-08
genome	16	20491567	+	378	1	280	0	367	0	614	15	417	7	639	15	1670	0.0221557	0.0735025	2.67278e-07
genome	16	20498164	+	406	0	266	0	378	0	649	24	378	9	535	12	1562	0.0288092	0.300996	6.91025e-11
genome	16	20499521	+	237	0	162	0	212	0	390	8	192	7	387	7	969	0.0227038	0.136834	1.94154e-05
genome	16	20500307	+	298	0	189	0	244	0	577	17	346	10	497	17	1420	0.0309859	0.0938976	9.21477e-09
genome	16	20504332	+	344	1	261	0	324	0	594	18	343	14	578	24	1515	0.0369637	0.214072	3.59665e-11
genome	16	20511569	+	291	0	189	0	245	0	553	13	385	9	565	12	1503	0.0226214	0.238297	1.36168e-06
genome	16	20540932	+	138	0	90	0	123	0	264	18	165	10	262	24	691	0.0752533	0.297269	2.69669e-10
genome	16	21715689	+	114	0	106	0	103	0	202	9	132	6	186	6	520	0.0403846	0.223175	3.34986e-05
genome	16	22113780	+	198	0	131	0	165	0	344	9	204	5	330	12	878	0.0296128	0.101081	7.95852e-06
genome	16	22869328	+	475	0	358	0	510	1	734	26	548	24	721	31	2003	0.0404393	0.126902	1.57369e-17
genome	16	22927371	+	279	0	196	0	263	0	467	13	272	12	465	8	1204	0.0274086	0.0927576	1.1885e-07
genome	16	22928755	+	236	0	144	0	173	1	374	11	221	6	380	12	975	0.0297436	0.0868992	2.2038e-05
genome	16	22930010	+	382	0	302	0	341	0	604	18	370	9	574	17	1548	0.0284238	0.0822893	1.52486e-10
genome	16	24349715	+	428	0	211	0	386	0	681	14	406	11	673	15	1760	0.0227273	0.0594743	9.032e-09
genome	16	25336520	+	252	0	179	0	210	0	406	14	331	6	369	19	1106	0.0352622	0.18444	1.40669e-08
genome	16	25341741	+	477	0	357	0	400	0	733	21	600	15	673	30	2006	0.0329013	0.173504	1.19625e-14
genome	16	29958493	+	128	0	128	0	132	1	286	13	256	9	283	14	825	0.0436364	0.146986	9.42183e-06
genome	16	31776227	+	118	0	96	0	107	0	217	12	196	5	208	6	621	0.037037	0.111814	5.97594e-05
genome	16	31776823	+	65	0	26	0	41	0	93	16	54	11	107	17	254	0.173228	0.621225	2.46008e-09
genome	16	32445398	+	146	0	107	0	129	0	305	4	174	9	260	9	739	0.02977	0.19889	9.37207e-05
genome	16	32448981	+	236	0	215	0	229	0	422	11	367	6	389	16	1178	0.0280136	0.0808501	2.49434e-07
genome	16	32451090	+	95	0	70	0	72	0	188	16	96	5	161	8	445	0.0651685	0.199802	3.01952e-06
genome	16	32721034	+	75	0	63	0	85	0	143	7	73	9	127	10	343	0.0758017	0.589346	1.49806e-06
genome	16	32726706	+	116	0	125	0	102	0	224	10	137	2	213	10	574	0.0383275	0.0712038	2.86552e-05
genome	16	32726808	+	73	0	56	0	82	0	163	6	91	3	138	12	392	0.0535714	0.164998	9.73894e-05
genome	16	32879109	+	1010	1	811	1	1019	1	1413	34	952	22	1399	31	3764	0.0231137	0.132199	3.77784e-18
genome	16	33119571	+	95	0	82	0	100	0	187	9	144	7	173	9	504	0.0496032	0.152631	1.41345e-05
genome	16	35741061	+	509	1	432	1	533	1	715	14	540	13	716	15	1971	0.021309	0.122505	6.82991e-08
genome	16	37703827	+	693	0	505	0	589	0	1139	45	785	12	1006	46	2930	0.0351536	0.105469	2.50672e-22
genome	16	38402373	+	132	0	112	1	133	0	241	13	189	5	234	9	664	0.0406627	0.123857	4.84483e-05
genome	16	38405784	+	80	0	60	0	70	0	128	7	81	4	112	8	321	0.05919	0.146393	5.65432e-05
genome	16	43960377	+	333	0	227	0	287	0	534	12	362	6	561	17	1457	0.024022	0.056729	9.29278e-08
genome	16	43981334	+	211	0	158	0	194	0	371	11	192	5	354	12	917	0.0305344	0.089646	1.28762e-06
genome	16	43981383	+	159	0	85	0	106	0	212	5	116	7	214	10	542	0.0405904	0.239877	1.4647e-05
genome	16	45025516	+	681	1	506	0	577	0	959	60	647	31	961	72	2567	0.0634982	0.300931	7.51539e-37
genome	16	45025636	+	193	0	143	0	142	0	334	13	255	7	296	13	885	0.0372881	0.175485	5.2242e-07
genome	16	48039702	+	260	0	187	0	256	0	438	42	305	17	422	29	1165	0.0755365	0.417951	2.48641e-19
genome	16	48111478	+	102	0	60	1	85	0	223	22	94	5	207	10	524	0.0706107	0.246207	5.48207e-06
genome	16	48114122	+	209	0	154	0	183	0	361	4	249	8	352	9	962	0.0218295	0.231327	7.33699e-05
genome	16	48442972	+	91	0	45	0	68	0	144	11	68	4	143	5	355	0.056338	0.463066	9.30841e-05
genome	16	50815190	+	9	0	7	0	10	0	18	17	13	11	10	9	41	0.902439	1	1.01375e-14
genome	16	53804772	+	409	0	333	1	382	0	693	31	525	21	710	19	1928	0.0368257	0.0701318	1.17582e-13
genome	16	53804896	+	240	0	217	0	240	0	468	9	402	15	468	13	1338	0.0276532	0.0749346	1.53751e-07
genome	16	53806135	+	322	0	226	0	315	1	521	12	339	8	533	11	1393	0.0222541	0.0603114	3.69479e-06
genome	16	56942279	+	277	1	157	0	230	0	494	15	283	8	495	14	1272	0.0290881	0.088405	2.06755e-06
genome	16	56958404	+	182	1	129	0	183	0	352	18	197	5	362	9	911	0.0351262	0.0947192	9.80779e-06
genome	16	56965105	+	200	0	130	0	188	0	329	57	200	36	320	59	849	0.179034	0.428823	1.23378e-34
genome	16	56973275	+	313	0	189	1	305	0	517	17	317	8	456	13	1290	0.0294574	0.100696	1.23129e-07
genome	16	58549986	+	54	0	31	0	46	0	102	14	50	2	83	6	235	0.093617	0.211335	4.03638e-05
genome	16	61198879	+	218	0	165	1	179	0	380	10	282	9	431	14	1093	0.0301921	0.708496	1.19208e-05
genome	16	62537754	+	189	0	131	0	165	1	336	11	219	3	382	15	937	0.0309498	0.0910848	5.32451e-05
genome	16	64673287	+	137	0	92	0	143	0	230	20	128	12	223	17	581	0.0843373	0.37002	1.28747e-11
genome	16	84654329	+	178	0	107	0	179	0	267	11	136	4	252	7	655	0.0335878	0.176707	6.58283e-06
genome	16	85441186	+	727	1	734	0	734	0	1047	120	971	107	1091	140	3109	0.118044	0.240252	8.59578e-88
genome	16	85441402	+	100	0	77	1	97	1	151	15	138	13	171	25	460	0.115217	0.349136	1.34956e-09
genome	16	88257070	+	360	0	278	0	354	0	620	16	467	13	602	13	1689	0.0248668	0.117572	3.08285e-09
genome	16	91045614	+	65	0	69	0	75	0	97	8	63	5	98	11	258	0.0930233	0.263549	3.95345e-07
genome	16	91050975	+	209	0	166	0	199	0	394	6	276	8	378	14	1048	0.0267176	0.21119	4.28989e-06
genome	16	91051019	+	395	0	325	0	377	1	786	29	634	17	734	21	2154	0.0311049	0.117963	1.78239e-11
genome	16	91451857	+	120	0	83	0	120	0	180	6	101	7	176	5	457	0.0393873	0.173121	5.74554e-05
genome	16	91452091	+	107	0	79	0	121	0	225	9	129	8	186	6	540	0.0425926	0.122639	2.6808e-05
genome	16	91452407	+	117	0	56	0	93	1	227	8	159	10	205	15	591	0.0558376	0.157672	4.13198e-05
genome	16	91453185	+	180	1	126	0	137	0	290	11	241	5	335	13	866	0.0334873	0.10751	5.88058e-05
genome	16	91455515	+	180	0	104	0	168	0	326	12	222	7	294	10	842	0.0344418	0.137959	3.26149e-06
genome	16	91456132	+	152	0	105	0	145	0	285	13	174	6	260	15	719	0.0472879	0.0982444	2.07722e-07
genome	16	91456366	+	170	0	123	0	146	0	278	8	141	6	240	7	659	0.0318665	0.0652654	1.93944e-05
genome	16	91457128	+	170	0	130	0	174	0	319	12	151	5	299	7	769	0.0312094	0.232951	8.59977e-06
genome	16	91667187	+	12	0	5	0	10	0	23	12	14	4	18	6	55	0.4	0.68119	2.55943e-05
genome	16	93406810	+	47	0	32	0	39	0	66	12	28	2	84	7	178	0.117978	0.322622	1.39291e-05
genome	16	97292891	+	449	1	305	0	393	0	757	55	454	27	662	53	1873	0.0720769	0.228946	7.95334e-28
genome	17	4931014	+	915	0	692	0	790	1	1542	45	1241	36	1522	48	4305	0.0299652	0.08767	3.81025e-24
genome	17	4931071	+	200	0	138	0	167	0	226	14	187	7	274	9	687	0.0436681	0.485979	5.0259e-08
genome	17	4931314	+	961	0	877	0	1004	0	1379	56	1215	44	1422	53	4016	0.0380976	0.121523	8.13607e-37
genome	17	4931337	+	1069	0	904	0	1084	1	1537	31	1247	32	1536	26	4320	0.0206019	0.0892401	5.43728e-20
genome	17	13135346	+	149	0	93	0	132	0	320	23	187	10	246	14	753	0.062417	0.295846	3.58628e-09
genome	17	13135376	+	347	0	235	0	311	0	589	12	365	10	548	16	1502	0.0252996	0.0549681	1.67115e-08
genome	17	13138319	+	559	0	379	0	500	0	777	23	449	7	716	17	1942	0.0242019	0.109185	3.8412e-12
genome	17	13139333	+	595	0	433	0	609	0	977	54	616	30	955	61	2548	0.0569074	0.895149	1.08415e-32
genome	17	13141760	+	25	0	8	1	17	1	40	12	7	4	36	21	83	0.445783	0.861475	9.99819e-08
genome	17	13142249	+	714	1	604	0	734	1	1080	25	801	17	1111	19	2992	0.0203877	0.123704	3.93637e-12
genome	17	13143267	+	481	0	308	0	460	0	809	26	434	3	829	18	2072	0.0226834	0.0924148	1.92494e-10
genome	17	13227263	+	193	1	150	0	164	0	381	12	240	5	350	14	971	0.0319258	0.0944524	2.2153e-05
genome	17	13229510	+	231	0	179	0	214	0	449	12	247	2	423	14	1119	0.0250223	0.0761254	3.61141e-06
genome	17	13234255	+	67	0	46	0	61	0	125	11	65	5	98	10	288	0.0902778	0.709389	2.94832e-06
genome	17	16947295	+	79	0	70	0	101	0	181	12	104	7	181	14	466	0.0708155	0.46062	4.63334e-07
genome	17	17598055	+	72	0	49	0	72	0	147	25	63	15	130	21	340	0.179412	0.431434	1.41518e-13
genome	17	17607762	+	108	0	94	0	121	0	224	8	147	6	213	8	584	0.0376712	0.113936	5.38621e-05
genome	17	17725433	+	8	0	8	0	9	0	17	14	4	4	18	18	39	0.923077	1	8.16879e-15
genome	17	17725480	+	5	0	5	0	6	0	12	8	4	0	11	10	27	0.666667	0.917736	7.70404e-06
genome	17	17725574	+	6	0	7	0	3	0	11	7	6	5	12	12	29	0.827586	0.987547	3.14695e-08
genome	17	17726467	+	9	0	5	1	8	0	13	8	13	13	24	24	50	0.9	1	1.69761e-12
genome	17	17726514	+	8	0	6	0	7	0	9	6	6	5	14	14	29	0.862069	1	1.87888e-10
genome	17	21177103	+	365	0	305	0	389	1	610	16	383	13	606	19	1599	0.0300188	0.0812525	3.92007e-10
genome	17	21178995	+	180	0	145	0	151	0	315	12	203	14	293	10	811	0.0443896	0.249164	4.48844e-08
genome	17	21180831	+	388	0	267	0	386	0	586	20	448	10	555	19	1589	0.030837	0.241091	1.40573e-11
genome	17	21181219	+	372	0	257	0	371	0	589	37	393	20	624	29	1606	0.0535492	0.166486	3.38684e-19
genome	17	21185916	+	263	0	219	0	269	0	459	19	345	8	448	14	1252	0.0327476	0.0954194	3.34429e-09
genome	17	21185977	+	194	0	117	0	177	0	356	6	205	6	337	11	898	0.0256125	0.0848344	4.17944e-05
genome	17	22805230	+	2	0	1	0	4	1	44	43	17	15	30	26	91	0.923077	1	1.06673e-05
genome	17	23828747	+	138	0	146	0	133	0	241	5	259	10	273	13	773	0.0362225	0.0975791	4.76214e-06
genome	17	24031466	+	191	0	106	0	134	0	312	10	195	4	257	7	764	0.0274869	0.148771	7.52554e-05
genome	17	24035668	+	130	0	84	0	104	0	228	19	133	8	190	9	551	0.0653358	0.200289	4.87967e-08
genome	17	24036061	+	230	0	158	0	183	0	394	17	286	7	374	14	1054	0.0360531	0.108507	5.64541e-08
genome	17	24036679	+	173	0	92	0	142	0	310	7	160	6	294	13	764	0.0340314	0.151071	1.29578e-05
genome	17	24037087	+	170	0	123	0	152	0	352	9	159	2	306	13	817	0.0293758	0.0892569	2.60219e-05
genome	17	24037951	+	132	0	101	0	106	0	235	18	144	13	220	23	599	0.0901503	0.300319	1.22391e-11
genome	17	24038019	+	222	0	163	0	189	1	400	18	244	11	340	9	984	0.0386179	0.131314	3.05929e-07
genome	17	24038370	+	235	0	149	0	198	0	383	9	202	4	344	9	929	0.0236814	0.135212	2.04365e-05
genome	17	24038389	+	245	0	154	0	187	0	414	17	221	10	343	13	978	0.0408998	0.124637	5.1451e-09
genome	17	24039231	+	296	0	207	0	279	0	472	14	330	6	418	7	1220	0.0221311	0.0906053	1.38932e-06
genome	17	24039865	+	212	0	136	0	159	0	381	27	208	12	299	18	888	0.0641892	0.196937	3.34864e-12
genome	17	24039991	+	229	0	221	0	231	0	451	18	365	8	391	19	1207	0.0372825	0.112636	1.33537e-09
genome	17	24040189	+	218	1	165	0	185	0	474	21	401	20	439	29	1314	0.0532725	0.14072	1.55088e-10
genome	17	24043224	+	181	0	130	0	145	0	312	4	195	6	303	11	810	0.0259259	0.118015	7.69045e-05
genome	17	24043505	+	238	0	135	0	191	0	409	9	261	5	360	9	1030	0.0223301	0.0707557	3.97943e-05
genome	17	24640818	+	149	0	76	0	116	1	269	28	121	7	303	22	693	0.0822511	0.205745	1.17088e-09
genome	17	24641258	+	252	0	155	1	220	0	444	15	246	9	439	14	1129	0.0336581	0.100388	6.08628e-07
genome	17	24644239	+	373	0	235	0	336	0	599	21	398	8	577	8	1574	0.023507	0.0749095	2.40073e-08
genome	17	24896813	+	96	0	73	0	71	0	203	15	149	11	162	20	514	0.0894942	0.464698	1.12777e-08
genome	17	24939095	+	587	1	530	4	576	8	810	25	745	18	825	28	2380	0.0298319	0.120128	1.94627e-07
genome	17	24939399	+	2612	4	2260	0	2334	1	3207	84	2723	66	3385	93	9315	0.026087	0.140633	1.09475e-53
genome	17	24939648	+	1460	1	1217	2	1380	0	1788	66	1373	58	1836	50	4997	0.0348209	0.10519	2.72109e-41
genome	17	24939678	+	1753	0	1564	1	1666	3	2161	47	1748	43	2154	62	6063	0.0250701	0.142513	1.13665e-34
genome	17	24939954	+	1941	0	1823	2	1917	0	2463	176	2085	141	2409	146	6957	0.0665517	0.267342	1.69283e-119
genome	17	24940007	+	1598	1	1439	0	1544	1	2181	67	1922	38	2035	67	6138	0.0280222	0.793521	2.30403e-39
genome	17	24940019	+	1608	0	1419	0	1562	1	2246	59	1930	59	2092	66	6268	0.0293555	0.643628	3.19182e-43
genome	17	24940679	+	562	0	478	1	466	1	751	20	636	13	695	11	2082	0.0211335	0.0734952	6.50786e-09
genome	17	24940821	+	593	0	528	2	502	0	731	129	615	113	678	96	2024	0.166996	0.439085	5.59825e-89
genome	17	25404024	+	74	0	31	0	54	0	97	11	45	3	132	18	274	0.116788	0.398037	2.14909e-07
genome	17	26343675	+	141	0	111	0	147	0	155	10	108	7	191	11	454	0.061674	0.57515	1.43359e-08
genome	17	26489710	+	721	0	599	0	710	0	1148	31	919	18	1064	28	3131	0.0245928	0.0687265	1.33453e-17
genome	17	26762250	+	448	0	390	0	434	1	667	16	557	8	610	16	1834	0.0218103	0.744675	1.0394e-08
genome	17	26762262	+	653	0	558	0	632	1	962	18	781	21	891	20	2634	0.0223994	0.573147	5.0006e-13
genome	17	26918349	+	132	0	115	0	127	0	247	10	234	6	256	12	737	0.0379919	0.102172	8.56098e-06
genome	17	27144831	+	127	0	107	0	112	0	247	11	184	7	233	6	664	0.0361446	0.21786	3.67488e-05
genome	17	27145242	+	243	0	203	1	210	0	455	20	306	9	397	18	1158	0.0405872	0.150995	9.00343e-09
genome	17	27749204	+	793	2	605	3	770	2	1214	50	994	38	1184	48	3392	0.0400943	0.118127	8.08317e-22
genome	17	27749377	+	252	0	132	0	202	0	347	9	157	4	347	6	851	0.0223267	0.0533451	4.37502e-05
genome	17	27775702	+	168	0	114	0	145	1	252	12	176	10	251	9	679	0.0456554	0.230039	2.74262e-06
genome	17	27781593	+	607	0	482	0	527	0	1022	40	860	20	924	26	2806	0.0306486	0.090042	6.34012e-18
genome	17	27781843	+	197	2	156	0	155	0	330	15	293	6	324	13	947	0.0359029	0.159365	3.28721e-05
genome	17	27782271	+	945	2	796	0	881	0	1274	41	1234	22	1279	32	3787	0.0250858	0.0680188	9.95386e-20
genome	17	27782381	+	743	4	577	3	680	2	1168	33	928	11	1077	23	3173	0.0211157	0.0734335	1.74549e-07
genome	17	28547942	+	1313	3	1274	3	1377	2	1942	50	1732	25	2080	57	5754	0.0229406	0.441214	1.34878e-21
genome	17	28549525	+	1506	1	1341	1	1425	1	2197	68	1897	72	2088	64	6182	0.032999	0.0891391	7.6485e-43
genome	17	28549814	+	1575	1	1508	1	1556	1	2176	101	2034	91	2206	118	6416	0.0483167	0.219713	9.29019e-70
genome	17	28910807	+	106	0	87	0	86	0	198	14	153	6	202	8	553	0.0506329	0.250516	8.52052e-06
genome	17	29255305	+	809	1	735	0	841	0	1101	26	931	18	1121	31	3153	0.0237869	0.222358	1.03356e-17
genome	17	29259770	+	330	2	229	1	304	1	564	23	318	1	541	18	1423	0.0295151	0.205144	7.42018e-06
genome	17	29261786	+	86	0	60	0	92	0	179	15	92	10	151	11	422	0.0853081	0.312079	5.78788e-08
genome	17	29317729	+	248	0	179	0	254	0	440	13	316	5	443	8	1199	0.0216847	0.0994972	7.55181e-06
genome	17	29318417	+	170	0	97	0	134	0	282	6	197	7	285	10	764	0.0301047	0.286173	5.43661e-05
genome	17	29710690	+	161	1	114	0	140	0	268	17	173	4	278	14	719	0.0486787	0.242576	1.23532e-06
genome	17	29860264	+	64	0	36	0	46	0	101	11	66	7	105	4	272	0.0808824	0.401621	5.75327e-05
genome	17	30822631	+	175	0	155	0	135	0	272	14	233	6	266	12	771	0.0415045	0.11121	2.15602e-07
genome	17	32275708	+	116	0	103	0	126	0	229	16	158	5	197	8	584	0.0496575	0.155442	1.09227e-06
genome	17	32593757	+	196	0	162	0	160	0	340	12	239	4	318	9	897	0.0278707	0.218858	9.9294e-06
genome	17	32593789	+	390	0	333	1	354	1	730	23	590	6	717	19	2037	0.0235641	0.0818472	1.90498e-07
genome	17	32593800	+	423	0	364	1	363	0	834	40	679	21	848	38	2361	0.0419314	0.155536	1.4988e-16
genome	17	34037933	+	84	0	66	0	92	0	127	6	94	7	144	5	365	0.0493151	0.138127	8.89985e-05
genome	17	34038086	+	91	0	81	0	78	0	167	9	102	4	170	15	439	0.0637813	0.181314	2.38977e-06
genome	17	34048728	+	404	0	305	0	407	0	630	23	449	13	614	33	1693	0.0407561	0.132431	3.82707e-16
genome	17	34124845	+	50	0	62	0	49	0	119	6	75	3	135	14	329	0.0699088	0.21348	8.07032e-05
genome	17	34129624	+	127	0	84	0	90	0	184	11	98	9	178	14	460	0.073913	0.210607	2.23178e-08
genome	17	34162550	+	66	0	70	0	88	0	168	16	112	6	136	8	416	0.0721154	0.219743	1.66712e-06
genome	17	34167267	+	110	0	62	0	83	0	178	16	127	10	169	13	474	0.0822785	0.279151	2.88611e-08
genome	17	34868206	+	78	0	52	0	67	0	142	14	117	7	111	6	370	0.072973	0.22216	7.00883e-06
genome	17	34869562	+	80	0	47	0	72	0	146	9	92	8	140	8	378	0.0661376	0.30931	1.92572e-05
genome	17	35073422	+	105	1	68	0	86	0	168	18	109	6	167	13	444	0.0833333	0.348405	3.56216e-07
genome	17	35122179	+	104	0	59	1	96	0	196	16	102	10	160	12	458	0.0829694	0.480217	3.47693e-07
genome	17	35124943	+	95	0	60	0	62	0	130	9	89	6	136	5	355	0.056338	0.148219	5.83119e-05
genome	17	35220516	+	108	1	64	0	109	0	206	11	115	7	167	11	488	0.0594262	0.173169	1.64264e-05
genome	17	35223510	+	324	0	180	0	287	0	531	16	355	14	540	21	1426	0.0357644	0.208162	1.2155e-10
genome	17	35223750	+	174	0	101	0	147	0	269	11	142	6	236	6	647	0.0355487	0.106805	8.24131e-06
genome	17	35229584	+	213	0	164	0	195	0	462	17	261	14	434	17	1157	0.0414866	0.097435	3.03725e-09
genome	17	35230195	+	178	0	182	0	161	0	363	10	233	7	329	10	925	0.0291892	0.14572	5.02295e-06
genome	17	35231490	+	239	0	190	0	232	0	471	13	349	11	414	21	1234	0.0364668	0.0982148	3.11004e-09
genome	17	35232329	+	275	0	168	0	225	0	381	16	288	4	407	17	1076	0.0343866	0.18041	1.36442e-08
genome	17	35233270	+	207	0	158	0	160	0	316	11	282	4	316	6	914	0.0229759	0.105197	6.66404e-05
genome	17	35233656	+	101	0	64	0	93	0	219	10	117	4	183	9	519	0.044316	0.118391	7.8909e-05
genome	17	35233723	+	209	0	150	0	162	1	349	17	232	12	352	10	933	0.0418006	0.399058	3.50992e-07
genome	17	35234385	+	276	1	211	0	233	0	459	37	363	19	425	19	1247	0.0601443	0.184963	1.81705e-14
genome	17	35234637	+	444	0	332	1	385	1	711	46	583	24	680	38	1974	0.0547112	0.168506	5.97948e-20
genome	17	35271780	+	107	1	85	0	75	0	166	10	124	5	175	19	465	0.0731183	0.222569	1.76748e-06
genome	17	35355098	+	210	0	152	0	218	0	425	25	249	7	364	9	1038	0.039499	0.132831	9.33891e-09
genome	17	35355187	+	244	0	165	0	223	0	414	13	175	3	356	11	945	0.0285714	0.160488	8.50302e-07
genome	17	35357566	+	148	0	94	0	131	0	310	11	163	9	249	12	722	0.0443213	0.155986	1.2817e-06
genome	17	35357645	+	217	0	184	0	196	0	408	69	300	43	343	65	1051	0.168411	0.441604	7.10551e-38
genome	17	35357665	+	233	0	180	0	191	0	387	22	301	17	368	25	1056	0.0606061	0.176275	1.30502e-13
genome	17	35358008	+	232	0	139	0	204	0	386	23	235	12	331	14	952	0.0514706	0.158481	5.46174e-11
genome	17	35360454	+	256	0	172	0	205	0	417	11	276	6	410	11	1103	0.0253853	0.125737	2.6897e-06
genome	17	35361812	+	277	0	198	0	238	0	466	29	288	10	420	16	1174	0.0468484	0.143901	2.82721e-12
genome	17	35363588	+	422	0	352	0	405	2	691	17	580	13	713	20	1984	0.0252016	0.0709002	1.19593e-08
genome	17	35462165	+	273	0	227	0	247	0	520	16	364	5	488	11	1372	0.0233236	0.0641726	7.99991e-07
genome	17	35462410	+	483	0	438	1	485	0	703	10	565	19	677	18	1945	0.0241645	0.0722409	1.30523e-10
genome	17	35466058	+	331	1	200	0	274	0	511	17	325	6	527	17	1363	0.029347	0.228238	1.12559e-07
genome	17	35471775	+	397	0	304	0	355	1	635	25	445	33	619	32	1699	0.0529723	0.296606	1.84824e-18
genome	17	35471942	+	367	0	225	0	300	1	561	13	353	8	503	10	1417	0.0218772	0.0589454	3.08442e-06
genome	17	35472217	+	373	0	284	0	363	0	580	50	381	34	592	45	1553	0.083065	0.270293	5.70785e-30
genome	17	35555163	+	486	0	397	0	458	0	823	23	731	10	815	15	2369	0.0202617	0.0656712	3.74629e-10
genome	17	35817030	+	1195	1	1085	0	1138	2	1719	73	1530	56	1781	76	5030	0.0407555	0.184407	1.32371e-42
genome	17	35817122	+	1077	0	881	0	1080	0	1564	89	1236	72	1505	102	4305	0.0610918	0.177549	3.34248e-63
genome	17	36170077	+	109	0	84	0	85	0	197	9	122	8	168	13	487	0.0616016	0.169489	9.33713e-07
genome	17	36298360	+	133	0	85	0	104	0	248	20	133	12	238	15	619	0.0759289	0.506559	1.51324e-09
genome	17	36298463	+	127	0	117	0	92	0	181	16	146	21	181	22	508	0.116142	0.401571	2.34899e-14
genome	17	36537019	+	295	0	190	0	310	0	440	36	275	15	512	26	1227	0.0627547	0.178691	7.49115e-18
genome	17	37313603	+	506	0	324	0	438	0	837	25	573	22	790	18	2200	0.0295455	0.128855	9.99451e-14
genome	17	37321108	+	365	0	300	0	313	0	607	14	456	8	584	16	1647	0.0230723	0.0730962	1.72788e-08
genome	17	37321199	+	343	0	265	0	313	0	615	15	418	6	559	18	1592	0.0244975	0.132673	1.56026e-08
genome	17	46544707	+	65	0	35	0	64	0	113	5	40	4	105	10	258	0.0736434	0.224043	6.65986e-05
genome	17	46546907	+	103	0	109	0	70	0	160	7	160	6	176	16	496	0.0584677	0.467663	1.57585e-06
genome	17	46809900	+	57	0	44	1	72	1	105	15	54	8	86	10	245	0.134694	0.340983	1.08754e-06
genome	17	46810297	+	75	0	71	0	91	0	154	6	95	7	148	7	397	0.0503778	0.367573	7.14815e-05
genome	17	46959413	+	205	0	155	0	172	0	360	16	218	7	349	9	927	0.03452	0.103321	4.078e-07
genome	17	47722056	+	283	1	287	0	301	1	520	11	441	15	547	17	1508	0.0285146	0.125659	3.64076e-07
genome	17	47905769	+	378	0	303	0	370	0	605	24	484	11	618	30	1707	0.0380785	0.137329	1.78107e-14
genome	17	47905832	+	404	2	341	0	388	1	649	24	518	17	625	23	1792	0.0357143	0.23719	4.92498e-11
genome	17	47908493	+	284	0	227	0	248	0	459	9	382	13	435	21	1276	0.0336991	0.0909799	1.46745e-09
genome	17	47908988	+	421	0	332	0	388	0	655	18	556	28	680	22	1891	0.0359598	0.124203	7.18899e-15
genome	17	47909599	+	202	0	145	0	227	0	408	8	255	6	356	9	1019	0.0225711	0.143867	3.14568e-05
genome	17	47909764	+	289	0	218	0	229	0	505	15	388	6	514	12	1407	0.0234542	0.0635915	8.18985e-07
genome	17	47910161	+	266	0	209	0	252	0	434	21	285	19	416	17	1135	0.0502203	0.239386	3.16894e-13
genome	17	48722304	+	72	0	45	0	70	0	115	9	75	7	135	9	325	0.0769231	0.319561	8.17721e-06
genome	17	54213817	+	106	0	77	0	108	0	224	8	127	7	212	8	563	0.0408526	0.124482	5.8905e-05
genome	17	56369154	+	87	0	65	0	71	0	161	10	108	10	159	7	428	0.0630841	0.195636	9.03542e-06
genome	17	56389369	+	89	0	45	1	58	0	143	10	81	10	134	22	358	0.117318	0.335165	1.0124e-07
genome	17	56619899	+	412	0	307	1	394	0	660	70	438	44	624	75	1722	0.109756	0.354122	1.29956e-41
genome	17	56624994	+	129	0	86	0	121	1	278	80	158	45	280	77	716	0.282123	0.617181	2.89435e-37
genome	17	56630408	+	313	0	209	0	288	0	564	15	310	4	534	18	1408	0.0262784	0.0869969	4.18431e-08
genome	17	56907362	+	156	0	90	0	135	0	250	10	166	5	221	9	637	0.0376766	0.162251	1.10036e-05
genome	17	56911185	+	139	0	98	0	138	0	297	11	168	5	262	11	727	0.0371389	0.112155	1.12125e-05
genome	17	56920593	+	716	0	614	0	681	0	1163	43	970	23	1090	32	3223	0.0304065	0.0892025	1.2991e-21
genome	17	56920637	+	611	0	437	1	564	0	1003	24	644	14	926	20	2573	0.0225418	0.0538675	1.02874e-11
genome	17	57012554	+	81	0	67	0	82	0	138	11	85	7	161	7	384	0.0651042	0.178181	5.92106e-06
genome	17	57018221	+	111	0	108	0	103	0	239	13	179	3	201	6	619	0.0355412	0.185717	8.7433e-05
genome	17	57024816	+	67	0	43	0	59	0	136	14	95	8	134	11	365	0.090411	0.337018	2.17491e-06
genome	17	57297481	+	222	0	155	0	178	0	348	9	268	8	345	9	961	0.0270552	0.171595	6.28158e-06
genome	17	57303120	+	189	0	119	0	138	0	302	16	190	10	305	21	797	0.0589711	0.257756	5.12908e-10
genome	17	65059559	+	59	0	35	0	46	0	94	11	48	6	74	5	216	0.101852	0.317452	1.07909e-05
genome	17	66148275	+	87	0	68	0	78	0	147	9	102	8	139	8	388	0.064433	0.176523	5.79466e-06
genome	17	71182888	+	719	1	544	0	599	0	1018	65	678	33	997	78	2693	0.0653546	0.307606	4.52643e-40
genome	17	71183007	+	101	0	94	1	102	3	466	39	344	32	428	48	1238	0.0961228	0.432327	4.73672e-08
genome	17	71183250	+	182	1	147	0	159	1	235	18	214	5	255	13	704	0.0511364	0.142864	5.40351e-07
genome	17	71270795	+	12	0	10	0	6	0	35	14	19	3	24	9	78	0.333333	0.808066	8.76595e-05
genome	17	74794470	+	70	0	53	0	79	0	158	10	96	8	138	5	392	0.0586735	0.170964	5.6238e-05
genome	17	78800119	+	161	0	115	0	169	0	374	8	213	5	347	11	934	0.0256959	0.0737522	7.88455e-05
genome	17	80531998	+	105	0	90	1	98	0	200	9	152	4	219	16	571	0.0507881	0.134586	5.29821e-05
genome	17	83787135	+	80	0	55	0	53	0	122	17	73	8	115	10	310	0.112903	0.495006	2.88139e-08
genome	17	84083081	+	138	0	108	0	138	0	240	8	161	5	250	9	651	0.0337942	0.177666	3.24992e-05
genome	17	85265479	+	126	0	118	0	129	0	255	13	213	7	245	10	713	0.0420757	0.128491	2.65859e-06
genome	17	85806230	+	641	1	486	0	641	0	903	33	682	11	930	22	2515	0.0262425	0.15667	1.10289e-14
genome	17	87980092	+	154	0	100	0	144	0	270	14	144	9	267	12	681	0.051395	0.148986	7.25193e-08
genome	17	87987254	+	163	0	135	0	147	0	271	47	161	37	226	48	658	0.200608	0.459208	6.37017e-33
genome	17	88026030	+	138	0	69	0	101	0	193	10	99	7	174	8	466	0.0536481	0.215655	2.38034e-06
genome	17	88028396	+	219	0	131	0	188	1	371	15	190	9	369	19	930	0.0462366	0.141946	3.57637e-08
genome	17	88028405	+	205	1	118	0	170	0	369	13	204	4	348	10	921	0.029316	0.0839889	8.69801e-05
genome	17	88282540	+	319	1	241	0	255	0	586	24	421	9	496	23	1503	0.0372588	0.193515	4.26095e-10
genome	17	88282549	+	306	0	239	0	246	0	564	15	406	13	466	10	1436	0.0264624	0.0575248	4.80712e-08
genome	17	88282626	+	232	0	170	0	215	0	454	10	293	6	423	12	1170	0.0239316	0.136535	6.31879e-06
genome	17	88292027	+	443	0	295	1	362	0	661	24	368	5	623	16	1652	0.0272397	0.0781264	1.60681e-09
genome	17	88292837	+	351	0	222	0	332	0	623	15	331	7	545	15	1499	0.0246831	0.0669285	2.17007e-08
genome	17	88292918	+	386	0	298	0	344	0	603	15	453	13	562	12	1618	0.0247219	0.0837413	2.36115e-09
genome	17	88294000	+	367	0	267	0	393	0	582	10	327	5	552	21	1461	0.0246407	0.133395	3.96719e-09
genome	17	88294356	+	485	2	348	0	438	0	718	39	454	21	649	35	1821	0.0521691	0.199242	4.38096e-20
genome	17	88295752	+	174	0	113	0	137	0	331	9	187	7	270	6	788	0.0279188	0.168827	6.93906e-05
genome	17	88298228	+	578	0	362	0	495	0	773	54	455	23	732	44	1960	0.0617347	0.298051	2.68281e-30
genome	17	88438316	+	45	0	32	0	29	0	74	7	75	11	86	11	235	0.123404	0.447216	1.14969e-05
genome	17	88438565	+	206	1	160	0	207	0	342	11	289	7	351	14	982	0.0325866	0.318885	4.41756e-06
genome	17	89399478	+	209	0	136	0	204	0	328	18	217	3	319	13	864	0.0393519	0.128152	4.21437e-08
genome	17	89399631	+	76	0	53	0	85	0	151	8	111	8	149	7	411	0.0559611	0.38264	5.23259e-05
genome	17	90986629	+	308	1	199	0	250	0	503	10	378	9	480	14	1361	0.0242469	0.0674884	5.1768e-06
genome	18	8051283	+	145	0	123	0	147	0	258	9	205	8	257	9	720	0.0361111	0.123805	6.13282e-06
genome	18	8051694	+	108	0	72	1	107	0	188	44	116	14	182	39	486	0.199588	0.59654	2.18973e-20
genome	18	9593192	+	17	0	16	0	22	0	32	31	28	23	29	26	89	0.898876	1	1.03999e-30
genome	18	12261978	+	157	0	92	0	125	0	220	8	165	1	251	12	636	0.0330189	0.14356	5.3432e-05
genome	18	12499000	+	92	1	72	0	84	1	174	10	141	12	187	14	502	0.0717131	0.186748	3.21327e-05
genome	18	14558095	+	519	0	374	2	498	1	761	51	583	29	716	30	2060	0.0533981	0.540583	1.1775e-21
genome	18	14704230	+	254	0	200	0	243	0	470	15	337	6	479	7	1286	0.0217729	0.0729608	4.87874e-06
genome	18	15965909	+	993	1	835	1	975	1	1526	43	1217	30	1443	41	4186	0.0272336	0.078105	4.09624e-22
genome	18	15965968	+	863	0	769	0	859	1	1255	35	1046	19	1282	31	3583	0.0237231	0.472022	7.87883e-19
genome	18	15966168	+	448	0	396	0	430	0	526	11	414	13	543	16	1483	0.0269724	0.227398	1.32178e-11
genome	18	16123200	+	288	0	146	0	251	0	508	15	302	7	489	6	1299	0.021555	0.0563737	6.39352e-06
genome	18	24078278	+	341	1	328	1	393	0	524	26	465	18	572	30	1561	0.0474055	0.237335	5.23583e-15
genome	18	24400649	+	114	0	87	0	101	0	176	6	132	4	178	14	486	0.0493827	0.151937	7.33802e-06
genome	18	24750501	+	94	0	76	0	103	0	202	9	115	4	186	11	503	0.0477137	0.20256	2.48255e-05
genome	18	27731944	+	569	0	430	0	588	1	953	23	602	12	993	24	2548	0.0231554	0.408681	7.24568e-12
genome	18	27731981	+	341	0	269	0	372	1	617	22	377	17	616	13	1610	0.0322981	0.149835	2.70637e-10
genome	18	27732140	+	848	1	547	2	854	0	1254	35	771	26	1224	32	3249	0.0286242	0.0977445	3.53174e-18
genome	18	27732164	+	780	1	473	1	693	0	1078	50	695	32	996	47	2769	0.0465872	0.202814	6.71626e-28
genome	18	27732236	+	533	1	391	0	530	0	865	30	579	6	863	24	2307	0.0260078	0.0737678	3.34553e-12
genome	18	27732361	+	655	1	475	0	642	0	849	122	613	77	914	112	2376	0.130892	0.493585	7.1847e-78
genome	18	27732705	+	191	0	155	0	233	0	319	6	253	7	329	11	901	0.0266371	0.0759977	5.94741e-06
genome	18	27732762	+	235	0	159	0	206	0	457	11	283	9	435	10	1175	0.0255319	0.114888	3.71594e-06
genome	18	27733386	+	330	0	146	0	261	0	531	46	218	10	471	30	1220	0.0704918	0.298776	6.92969e-19
genome	18	32232831	+	3	0	7	0	7	0	20	19	10	9	13	11	43	0.906977	1	1.54563e-11
genome	18	32992298	+	163	0	101	0	136	0	259	17	197	20	256	14	712	0.0716292	0.35888	6.82389e-11
genome	18	34467411	+	157	0	86	0	146	0	250	17	132	4	294	9	676	0.0443787	0.187599	9.4046e-07
genome	18	34758586	+	296	0	239	0	284	0	483	21	331	13	502	27	1316	0.0463526	0.149221	8.78546e-14
genome	18	34763129	+	118	0	81	0	85	0	199	8	104	4	153	11	456	0.0504386	0.17533	1.17179e-05
genome	18	34929914	+	120	0	86	0	106	0	211	9	97	3	183	7	491	0.0386965	0.126146	7.6027e-05
genome	18	34960573	+	81	0	90	0	73	0	165	12	162	8	187	9	514	0.0564202	0.17373	9.85253e-06
genome	18	35287400	+	222	0	123	0	169	0	230	25	123	11	239	30	592	0.111486	0.273848	2.04058e-19
genome	18	35287571	+	324	1	209	0	334	0	479	9	271	7	525	14	1275	0.0235294	0.141439	2.01535e-06
genome	18	35315413	+	253	0	158	0	214	0	456	12	227	7	378	13	1061	0.0301602	0.26146	3.06868e-07
genome	18	35315584	+	279	0	193	0	225	0	488	14	306	10	442	10	1236	0.0275081	0.135667	2.11153e-07
genome	18	35372589	+	252	0	182	0	231	0	416	12	289	10	388	9	1093	0.0283623	0.132978	3.39372e-07
genome	18	35377800	+	279	0	205	0	279	0	481	18	330	13	490	13	1301	0.0338201	0.177787	1.15364e-09
genome	18	35382776	+	455	0	372	0	414	0	709	39	448	12	679	21	1836	0.0392157	0.172452	4.02373e-17
genome	18	35387739	+	103	1	54	0	88	0	200	15	104	8	174	12	478	0.0732218	0.282767	4.45079e-06
genome	18	35669888	+	489	0	418	0	515	1	793	17	639	11	749	19	2181	0.0215497	0.109658	9.2089e-10
genome	18	35705764	+	117	0	63	0	100	0	207	12	76	2	204	6	487	0.0410678	0.0762739	9.80467e-05
genome	18	35749313	+	242	0	252	0	245	0	457	7	340	10	489	9	1286	0.0202177	0.0513149	6.80334e-06
genome	18	35749395	+	184	0	135	0	182	0	292	11	155	6	284	16	731	0.0451436	0.138439	2.44602e-08
genome	18	35934394	+	164	0	86	0	150	0	235	14	115	10	256	25	606	0.0808581	0.359032	7.30608e-12
genome	18	35938662	+	168	0	96	0	185	0	325	9	174	5	287	7	786	0.0267176	0.121408	6.85602e-05
genome	18	36423015	+	32	0	21	0	21	1	53	10	31	6	47	12	131	0.21374	0.51639	1.40064e-05
genome	18	36886561	+	124	0	80	0	130	0	181	21	101	17	219	26	501	0.127745	0.305287	1.12561e-15
genome	18	36895452	+	90	0	73	0	107	0	205	7	151	8	188	11	544	0.0477941	0.249373	2.29595e-05
genome	18	36931292	+	132	0	100	0	108	0	243	12	173	5	225	8	641	0.0390016	0.104781	2.03123e-05
genome	18	37966397	+	58	0	48	0	55	0	118	18	73	13	98	10	289	0.141869	0.330656	4.33638e-09
genome	18	42385863	+	52	1	36	0	46	0	135	75	87	37	137	77	359	0.526462	0.971439	2.02196e-33
genome	18	42656975	+	123	0	82	0	94	0	220	18	111	5	194	12	525	0.0666667	0.311194	9.17998e-08
genome	18	42681602	+	75	0	42	0	65	0	120	18	86	7	110	17	316	0.132911	0.567828	1.72602e-09
genome	18	42697278	+	61	0	28	0	32	0	91	8	31	5	89	8	211	0.0995261	0.459342	5.00743e-05
genome	18	42701586	+	109	0	69	0	104	0	215	5	120	5	246	15	581	0.0430293	0.131599	4.25682e-05
genome	18	42701609	+	98	0	60	0	94	0	150	8	75	5	172	6	397	0.0478589	0.216192	7.41077e-05
genome	18	42708114	+	96	0	61	0	79	0	149	9	68	3	148	9	365	0.0575342	0.175461	2.24187e-05
genome	18	44538760	+	119	0	75	0	108	0	187	13	96	3	177	5	460	0.0456522	0.20738	2.07185e-05
genome	18	46742075	+	223	1	135	0	224	0	379	14	206	6	394	24	979	0.0449438	0.137796	1.50229e-08
genome	18	47863267	+	193	0	171	0	160	0	347	14	293	14	333	18	973	0.0472765	0.272098	1.68655e-09
genome	18	48179759	+	1198	1	1265	0	1234	1	1626	70	1759	56	1672	48	5057	0.0344078	0.10294	2.75568e-39
genome	18	48179922	+	1329	1	1253	1	1319	0	1900	52	1803	31	1821	45	5524	0.0231716	0.243076	1.62597e-27
genome	18	48180140	+	619	0	483	1	611	2	996	69	745	57	947	62	2688	0.0699405	0.536311	3.10172e-37
genome	18	48180355	+	1053	2	898	1	1028	4	1552	34	1302	26	1460	34	4314	0.0217895	0.0683457	9.597e-15
genome	18	48180568	+	1205	21	1119	19	1168	13	1592	53	1512	34	1620	47	4724	0.0283658	0.0768432	3.64818e-05
genome	18	48180986	+	1359	0	1255	1	1295	1	1890	66	1868	50	1902	72	5660	0.0332155	0.0988763	1.16386e-40
genome	18	50297769	+	80	0	39	0	70	0	123	20	54	5	95	13	272	0.139706	0.382415	6.25262e-10
genome	18	50303834	+	81	0	48	1	71	0	143	19	74	4	143	6	360	0.0805556	0.243115	2.13203e-05
genome	18	50305157	+	99	0	66	0	95	0	179	7	107	5	205	11	491	0.0468432	0.143885	4.73878e-05
genome	18	53322803	+	112	0	109	0	128	0	217	8	127	6	192	9	536	0.0429104	0.398087	8.09825e-06
genome	18	53343507	+	89	0	63	0	80	0	153	14	68	4	138	10	359	0.0779944	0.636458	5.63578e-07
genome	18	53343776	+	88	0	60	0	76	0	134	13	70	5	126	16	330	0.10303	0.274554	1.08251e-08
genome	18	56708545	+	65	0	59	0	85	0	152	6	82	7	147	8	381	0.0551181	0.161711	8.39743e-05
genome	18	56841427	+	364	0	255	0	283	1	598	17	449	7	580	9	1627	0.0202827	0.0531363	5.48403e-06
genome	18	56861476	+	257	0	188	1	256	1	428	28	235	16	400	17	1063	0.0573848	0.271239	6.53167e-12
genome	18	56861518	+	289	0	201	0	263	0	472	52	287	42	449	52	1208	0.120861	0.388518	5.20366e-33
genome	18	56862422	+	524	1	350	0	474	0	792	34	480	21	763	28	2035	0.0407862	0.35041	8.43053e-18
genome	18	56866378	+	302	1	245	0	284	0	508	15	344	10	511	11	1363	0.0264123	0.0715997	4.49071e-07
genome	18	56882869	+	280	0	207	0	292	0	424	8	233	4	456	13	1113	0.0224618	0.268519	1.5509e-06
genome	18	58804369	+	26	0	22	0	31	0	62	10	37	5	50	7	149	0.147651	0.501297	4.80636e-05
genome	18	61688889	+	372	0	228	0	307	0	536	13	326	8	549	8	1411	0.0205528	0.0997314	4.9953e-07
genome	18	61720658	+	388	0	267	0	343	0	556	20	398	5	547	21	1501	0.0306462	0.0900338	4.95107e-11
genome	18	61721540	+	150	0	95	0	141	0	283	10	201	10	264	11	748	0.0414439	0.126423	2.01334e-06
genome	18	64421748	+	428	1	300	0	373	0	658	22	383	6	670	17	1711	0.0263004	0.07997	2.9334e-09
genome	18	67422384	+	129	1	74	0	115	0	230	14	153	5	251	15	634	0.0536278	0.151949	9.36637e-06
genome	18	67921777	+	137	0	90	0	94	0	239	21	95	9	188	16	522	0.0881226	0.497349	1.20385e-10
genome	18	67927625	+	101	0	74	0	104	0	178	7	121	8	156	4	455	0.0417582	0.135468	9.78483e-05
genome	18	68825186	+	23	1	11	0	16	0	12	8	15	13	18	10	45	0.688889	1	4.25054e-13
genome	18	68825236	+	14	1	24	1	13	0	7	5	9	4	14	6	30	0.5	0.842379	1.5984e-06
genome	18	68825355	+	50	1	44	3	56	1	18	8	14	4	9	5	41	0.414634	0.82727	2.43719e-09
genome	18	74928322	+	55	0	22	0	44	0	72	11	43	3	68	10	183	0.131148	0.40412	2.6899e-06
genome	18	75502301	+	86	0	45	0	58	0	132	12	92	12	125	16	349	0.114613	0.391776	1.3119e-08
genome	18	77029056	+	110	0	79	0	112	0	209	11	97	8	224	5	530	0.045283	0.412133	1.69137e-05
genome	18	77126600	+	155	0	146	0	171	0	328	8	219	7	324	8	871	0.0264064	0.0894512	4.26279e-05
genome	18	77866329	+	596	0	508	1	587	1	891	148	616	87	825	124	2332	0.153945	0.412664	4.41681e-87
genome	18	77867565	+	903	1	785	1	929	0	1355	55	1266	39	1305	53	3926	0.0374427	0.10075	1.51919e-30
genome	18	77870557	+	177	0	105	0	199	0	334	10	139	7	335	7	808	0.029703	0.134024	1.19003e-05
genome	18	80250458	+	354	0	224	1	319	0	547	38	294	15	526	34	1367	0.063643	0.811705	1.03884e-18
genome	18	80254654	+	370	0	317	0	347	0	574	23	511	33	574	20	1659	0.0458107	0.140582	5.20804e-17
genome	18	80255061	+	198	0	175	0	206	0	359	18	248	17	366	14	973	0.0503597	0.155007	7.28699e-11
genome	18	80255161	+	167	0	122	0	158	0	296	6	185	7	260	8	741	0.0283401	0.114945	4.44653e-05
genome	18	80255677	+	152	0	104	0	131	0	241	38	160	21	233	22	634	0.12776	0.521426	2.15883e-18
genome	18	82356633	+	222	0	222	1	228	0	408	16	367	8	385	11	1160	0.0301724	0.143463	1.31656e-06
genome	18	82357025	+	2221	3	2176	1	2273	2	2987	152	2981	95	2986	144	8954	0.0436676	0.133672	2.66137e-86
genome	18	82357306	+	1490	0	1389	3	1417	2	2090	59	2042	30	1942	53	6074	0.0233783	0.226453	3.77766e-27
genome	18	82357389	+	240	0	212	1	235	2	491	19	426	14	490	19	1407	0.0369581	0.099492	8.53366e-07
genome	18	82357614	+	228	0	134	0	190	1	383	18	216	4	344	5	943	0.028632	0.0912258	3.83058e-05
genome	18	82357662	+	478	0	444	1	473	0	733	27	611	13	729	22	2073	0.0299083	0.0873727	2.53412e-13
genome	18	82357797	+	1806	4	1683	7	1782	0	2391	133	1981	121	2408	131	6780	0.0567847	0.173404	6.68738e-82
genome	18	82357840	+	2226	0	2009	1	2176	0	2745	64	2298	63	2873	54	7916	0.0228651	0.0877579	7.58536e-46
genome	18	84897676	+	201	0	153	0	209	0	392	19	245	12	373	15	1010	0.0455446	0.139728	9.68126e-10
genome	18	84977318	+	121	0	87	0	153	0	215	12	85	1	223	7	523	0.0382409	0.250236	2.37276e-05
genome	18	84999257	+	297	0	247	0	318	0	449	10	320	8	449	8	1218	0.0213465	0.237777	8.10252e-07
genome	19	3255864	+	215	0	141	0	218	0	338	26	210	8	344	21	892	0.0616592	0.293055	6.91787e-13
genome	19	3944165	+	56	0	41	0	54	0	121	13	86	8	116	13	323	0.105263	0.636586	1.20549e-06
genome	19	4200759	+	92	0	56	0	69	0	158	6	98	4	167	13	423	0.0543735	0.366011	5.92832e-05
genome	19	4243168	+	437	0	267	0	410	0	658	165	430	96	610	127	1698	0.228504	0.588914	2.03644e-94
genome	19	4243196	+	381	1	282	0	377	0	596	167	465	112	522	143	1583	0.266582	0.635119	2.74161e-102
genome	19	4244473	+	371	1	291	0	389	0	651	22	445	8	565	16	1661	0.0276942	0.0957999	2.40461e-09
genome	19	4244773	+	572	0	450	0	535	1	867	43	568	32	777	48	2212	0.0556058	0.176098	4.30846e-28
genome	19	4245272	+	403	0	290	0	370	0	735	19	549	20	685	22	1969	0.0309802	0.0997689	2.62759e-12
genome	19	4245410	+	179	0	83	0	143	0	278	10	110	6	280	10	668	0.0389222	0.169401	3.6911e-06
genome	19	4652854	+	36	0	14	0	18	0	41	14	24	8	35	12	100	0.34	0.66353	1.35263e-09
genome	19	5013561	+	94	0	57	0	93	0	146	23	69	11	168	23	383	0.148825	0.368443	1.07745e-13
genome	19	5013659	+	131	0	96	0	134	0	255	25	202	22	246	25	703	0.102418	0.299641	2.97166e-14
genome	19	5476916	+	50	0	32	0	46	0	70	19	48	10	64	14	182	0.236264	0.554504	1.08737e-11
genome	19	5514364	+	66	0	42	0	72	0	111	9	66	7	98	15	275	0.112727	0.311152	8.16486e-08
genome	19	5543641	+	607	0	425	0	572	1	917	21	687	18	902	14	2506	0.0211492	0.0958828	7.23836e-11
genome	19	5543758	+	1084	2	864	1	979	2	1493	64	1385	58	1417	79	4295	0.0467986	0.155513	2.36623e-39
genome	19	6109188	+	1236	0	956	0	1191	1	1685	46	1259	28	1739	35	4683	0.0232757	0.0896305	5.0683e-25
genome	19	6109196	+	1265	1	948	1	1232	0	1716	64	1239	40	1775	67	4730	0.0361522	0.188505	1.73568e-38
genome	19	6140966	+	94	0	72	0	104	0	190	7	106	7	180	16	476	0.0630252	0.193515	9.93897e-07
genome	19	6348196	+	222	0	170	0	218	0	445	19	236	9	360	21	1041	0.0470701	0.235945	9.9881e-11
genome	19	6349155	+	87	0	75	0	103	0	202	8	165	6	198	10	565	0.0424779	0.134577	8.35472e-05
genome	19	6349642	+	117	0	64	0	113	0	214	8	136	6	187	13	537	0.0502793	0.154755	5.98193e-06
genome	19	6350051	+	73	0	51	0	81	0	139	8	73	4	139	9	351	0.0598291	0.189822	5.08065e-05
genome	19	6422399	+	260	0	172	0	247	0	394	15	237	5	453	9	1084	0.0267528	0.108345	6.47119e-07
genome	19	6424189	+	89	0	48	0	69	0	165	16	91	7	150	11	406	0.0837438	0.234518	5.35293e-07
genome	19	6424608	+	309	0	215	0	266	0	555	18	352	10	491	9	1398	0.0264664	0.0753936	5.3239e-08
genome	19	6424826	+	134	0	106	0	128	0	279	8	200	6	269	10	748	0.0320856	0.0867304	5.96916e-05
genome	19	7248166	+	189	0	138	0	163	0	308	8	187	2	274	9	769	0.0247074	0.0799154	7.83489e-05
genome	19	7248706	+	115	0	82	0	100	0	220	7	127	4	210	12	557	0.0412926	0.110668	4.58109e-05
genome	19	8748069	+	170	0	136	0	147	0	277	15	208	14	264	10	749	0.0520694	0.241392	6.63651e-09
genome	19	8798051	+	132	0	82	0	131	0	211	10	104	4	184	6	499	0.0400802	0.174016	2.32344e-05
genome	19	8798141	+	160	0	100	0	125	0	225	5	97	1	252	13	574	0.033101	0.322918	5.15135e-05
genome	19	8802255	+	301	0	216	0	269	0	525	22	351	12	492	29	1368	0.0460526	0.203527	2.22281e-13
genome	19	8802307	+	240	0	205	0	220	0	446	10	294	15	417	7	1157	0.0276577	0.105502	4.17005e-07
genome	19	8810908	+	79	0	46	1	55	0	148	14	69	10	107	13	324	0.114198	0.540763	5.54406e-07
genome	19	8848941	+	164	0	116	0	167	0	332	16	228	12	352	14	912	0.0460526	0.154395	3.85644e-08
genome	19	8849079	+	431	1	316	0	400	0	779	21	509	19	798	20	2086	0.0287632	0.0834778	6.39022e-11
genome	19	8849232	+	329	0	268	0	370	0	586	16	399	9	610	22	1595	0.0294671	0.085936	1.63551e-10
genome	19	8849411	+	304	0	250	0	302	0	554	23	351	16	529	19	1434	0.0404463	0.108499	1.04253e-12
genome	19	8849584	+	279	0	242	0	299	0	560	14	375	10	543	30	1478	0.0365359	0.110131	3.1364e-11
genome	19	8850914	+	163	0	104	0	138	0	231	15	113	7	279	22	623	0.070626	0.182546	1.44485e-10
genome	19	8852613	+	333	0	270	0	328	0	565	35	413	21	564	31	1542	0.0564202	0.121216	5.54256e-19
genome	19	8852663	+	267	0	213	1	254	2	520	20	333	9	481	8	1334	0.0277361	0.266109	4.04316e-05
genome	19	8886353	+	136	0	78	0	134	1	250	15	160	7	241	13	651	0.0537634	0.563371	3.03912e-06
genome	19	8886957	+	160	0	118	0	116	0	259	8	193	5	261	10	713	0.0322581	0.675819	3.54689e-05
genome	19	8887866	+	206	0	161	0	207	0	354	20	274	15	405	17	1033	0.0503388	0.154942	6.54117e-11
genome	19	8888435	+	193	0	115	0	150	0	319	10	187	2	317	9	823	0.0255164	0.116253	8.40805e-05
genome	19	8888488	+	219	0	160	0	200	0	419	8	249	5	386	10	1054	0.0218216	0.125276	3.88375e-05
genome	19	8888498	+	228	0	171	0	202	0	421	8	262	6	377	16	1060	0.0283019	0.0818619	1.20949e-06
genome	19	8924759	+	185	0	117	0	178	0	314	18	188	13	359	23	861	0.0627178	0.192608	2.19537e-11
genome	19	8928541	+	126	0	75	0	150	0	311	15	153	5	267	8	731	0.0383037	0.102979	1.43517e-05
genome	19	8946546	+	1218	1	1050	1	1190	1	1644	44	1574	42	1688	44	4906	0.0264982	0.0577766	1.08719e-26
genome	19	8954693	+	1335	1	928	0	1164	0	1754	41	1406	21	1702	36	4862	0.0201563	0.0734134	5.50187e-22
genome	19	8954838	+	871	2	751	0	843	1	1241	60	968	41	1147	54	3356	0.0461859	0.596669	9.8448e-34
genome	19	8955327	+	1274	2	1058	0	1203	0	1736	33	1393	29	1690	52	4819	0.0236564	0.0719944	4.08735e-25
genome	19	9194022	+	9	0	12	0	11	1	40	15	22	4	51	25	113	0.389381	0.697664	2.2816e-05
genome	19	9194325	+	433	0	285	0	421	0	718	30	417	17	672	34	1807	0.0448257	0.144681	3.1425e-18
genome	19	9260836	+	685	0	581	0	657	0	1090	26	747	20	1052	36	2889	0.0283835	0.151934	4.24654e-19
genome	19	9261450	+	458	0	283	0	412	1	771	18	420	8	666	24	1857	0.0269251	0.0890907	5.1544e-10
genome	19	9586327	+	74	0	45	0	53	0	136	11	77	1	143	11	356	0.0646067	0.263427	9.08933e-05
genome	19	9961574	+	849	0	703	0	842	1	1325	46	1013	28	1185	41	3523	0.0326426	0.0969147	2.85674e-25
genome	19	9961585	+	716	1	625	0	696	2	1164	71	820	40	1039	52	3023	0.0539199	0.371834	3.09741e-33
genome	19	9962168	+	520	0	418	1	479	0	815	83	625	73	768	62	2208	0.0987319	0.748752	1.27047e-47
genome	19	10184632	+	208	0	178	0	201	0	427	16	293	2	413	13	1133	0.027361	0.078554	2.07967e-06
genome	19	10589027	+	312	0	202	0	254	0	487	9	260	4	475	13	1222	0.0212766	0.0687793	2.80923e-06
genome	19	10592864	+	459	0	375	0	461	0	699	19	456	12	685	10	1840	0.0222826	0.0604145	2.69711e-10
genome	19	10596423	+	578	0	487	0	569	2	1003	46	852	30	955	39	2810	0.0409253	0.109727	5.29379e-21
genome	19	10596430	+	594	0	521	0	596	0	1074	38	927	17	1033	21	3034	0.0250494	0.0703575	1.23054e-15
genome	19	10596634	+	536	1	454	0	534	1	769	114	621	70	803	92	2193	0.125855	0.651052	2.14622e-63
genome	19	10599657	+	451	0	317	0	363	0	660	74	402	57	581	72	1643	0.123554	0.58092	2.86939e-49
genome	19	10599749	+	477	0	339	0	424	0	810	23	653	28	770	36	2233	0.038961	0.118232	1.11321e-17
genome	19	10602621	+	225	1	162	0	228	1	453	9	241	11	388	11	1082	0.0286506	0.0924977	5.95804e-05
genome	19	10602680	+	448	2	294	0	429	0	784	13	437	12	725	18	1946	0.0220966	0.0750827	2.06542e-07
genome	19	10605800	+	298	0	253	0	280	0	552	22	346	12	478	7	1376	0.0297965	0.187999	3.07914e-09
genome	19	10605849	+	302	1	247	0	280	1	483	21	350	14	500	12	1333	0.0352588	0.127949	1.88714e-08
genome	19	10606850	+	507	0	393	0	503	0	895	34	683	15	792	28	2370	0.0324895	0.0963893	1.76927e-16
genome	19	10607023	+	498	0	329	0	460	0	833	29	556	15	805	22	2194	0.030082	0.100432	4.06982e-14
genome	19	10607149	+	457	0	221	1	416	0	619	15	332	6	656	17	1607	0.0236465	0.105236	3.74235e-08
genome	19	10874948	+	90	0	49	0	82	0	154	32	83	15	159	27	396	0.186869	0.773438	3.67475e-16
genome	19	10875255	+	155	0	113	1	140	0	258	13	160	16	235	26	653	0.0842266	0.40188	2.37444e-11
genome	19	10876639	+	232	1	141	0	202	0	392	16	236	13	372	14	1000	0.043	0.139213	4.02109e-08
genome	19	10880078	+	323	0	282	0	272	0	525	15	475	6	510	11	1510	0.0211921	0.0814448	3.82798e-07
genome	19	10880391	+	291	0	224	0	214	0	496	9	345	8	439	12	1280	0.0226562	0.177256	1.87098e-06
genome	19	10880767	+	284	1	204	0	234	0	433	9	285	9	403	14	1121	0.0285459	0.0827173	1.42128e-06
genome	19	10880822	+	231	0	174	0	216	0	379	45	231	25	366	47	976	0.119877	0.310783	5.29036e-27
[truncated: 6,409 more rows]
